# Supplementary material
Source: publisher figshare collection journal article supplement (https://gsajournals.figshare.com/ndownloader/files/28321917)
Supplement: Supplementary file 1 [file 28321917]

## Sheet: Table S7
Table S7 GO terms between the different samples
Sample VS Sample	Regulation	Category	p_value	q_value	NumDEInCat	NumInCat	Term	Class	Gene_id
1VS2	Down	GO:0043565	3.07002e-05	0.0342885	3	38	sequence-specific DNA binding	molecular_function	XLOC_002575, XLOC_004454, XLOC_028335
1VS2	Down	GO:0048364	3.64965e-05	0.0342885	2	6	root development	biological_process	XLOC_025578, XLOC_028335
1VS2	Down	GO:0008757	0.00170222	0.537925	1	1	S-adenosylmethionine-dependent methyltransferase activity	molecular_function	XLOC_025578
1VS2	Down	GO:0010289	0.00170222	0.537925	1	1	homogalacturonan biosynthetic process	biological_process	XLOC_025578
1VS2	Down	GO:0003825	0.0017177	0.537925	1	1	alpha,alpha-trehalose-phosphate synthase (UDP-forming) activity	molecular_function	XLOC_038060
1VS2	Down	GO:0042335	0.0017177	0.537925	1	1	cuticle development	biological_process	XLOC_028335
1VS2	Down	GO:0005992	0.0034299	0.80622	1	2	trehalose biosynthetic process	biological_process	XLOC_038060
1VS2	Down	GO:0048765	0.00343255	0.80622	1	2	root hair cell differentiation	biological_process	XLOC_028335
1VS2	Down	GO:0005802	0.00439956	0.91853	1	3	trans-Golgi network	cellular_component	XLOC_025578
1VS2	Down	GO:0048367	0.00491731	0.923962	1	3	shoot system development	biological_process	XLOC_025578
1VS2	Down	GO:0032259	0.00607189	0.976386	1	4	methylation	biological_process	XLOC_025578
1VS2	Down	GO:0043481	0.00623557	0.976386	1	4	anthocyanin accumulation in tissues in response to UV light	biological_process	XLOC_028335
1VS2	Down	GO:0004018	0.00685184	0.990354	1	4	N6-(1,2-dicarboxyethyl)AMP AMP-lyase (fumarate-forming) activity	molecular_function	Glyma.10G247800
1VS2	Down	GO:0009735	0.00803702	1	1	5	response to cytokinin	biological_process	XLOC_025578
1VS2	Down	GO:0007155	0.00852771	1	1	5	cell adhesion	biological_process	XLOC_025578
1VS2	Down	GO:0005768	0.0105087	1	1	7	endosome	cellular_component	XLOC_025578
1VS2	Down	GO:0005774	0.0122757	1	1	8	vacuolar membrane	cellular_component	XLOC_025578
1VS2	Down	GO:0009408	0.01502	1	1	10	response to heat	biological_process	XLOC_004454
1VS2	Down	GO:0009678	0.0170456	1	1	10	hydrogen-translocating pyrophosphatase activity	molecular_function	Glyma.07G156900
1VS2	Down	GO:0005794	0.019977	1	1	13	Golgi apparatus	cellular_component	XLOC_025578
1VS2	Down	GO:0006351	0.0214279	1	2	142	transcription, DNA-templated	biological_process	XLOC_002575, XLOC_028335
1VS2	Down	GO:0015074	0.0219216	1	2	169	DNA integration	biological_process	XLOC_005953, XLOC_038535
1VS2	Down	GO:0005634	0.0250044	1	4	700	nucleus	cellular_component	XLOC_002575, XLOC_004454, XLOC_028335, XLOC_030774
1VS2	Down	GO:0050664	0.0281861	1	1	17	oxidoreductase activity, acting on NAD(P)H, oxygen as acceptor	molecular_function	Glyma.20G029600
1VS2	Down	GO:0000139	0.0288167	1	1	18	Golgi membrane	cellular_component	XLOC_025578
1VS2	Down	GO:0046872	0.0290559	1	2	173	metal ion binding	molecular_function	XLOC_028041, XLOC_030774
1VS2	Down	GO:0000272	0.0299254	1	1	18	polysaccharide catabolic process	biological_process	Glyma.01G151800
1VS2	Down	GO:0006298	0.0315206	1	1	20	mismatch repair	biological_process	Glyma.20G073400
1VS2	Down	GO:0004427	0.0328635	1	1	20	inorganic diphosphatase activity	molecular_function	Glyma.07G156900
1VS2	Down	GO:0015992	0.0355789	1	1	22	proton transport	biological_process	Glyma.07G156900
1VS2	Down	GO:0004721	0.0380412	1	1	27	phosphoprotein phosphatase activity	molecular_function	XLOC_030774
1VS2	Down	GO:0008168	0.0381848	1	1	25	methyltransferase activity	molecular_function	XLOC_025578
1VS2	Up	GO:0022857	0.00085	0.826291	5	134	transmembrane transporter activity	molecular_function	Glyma.06G111900, Glyma.09G087200, Glyma.09G087400, Glyma.13G081000, Glyma.20G246300
1VS2	Up	GO:0004553	0.000879501	0.826291	8	365	hydrolase activity, hydrolyzing O-glycosyl compounds	molecular_function	Glyma.05G216400, Glyma.10G017000, Glyma.10G251700, Glyma.13G218300, Glyma.15G093700, Glyma.17G252400, Glyma.19G106700, Glyma.20G141800
1VS2	Up	GO:0005215	0.00230934	0.966973	6	244	transporter activity	molecular_function	Glyma.03G227500, Glyma.10G296600, Glyma.13G167700, Glyma.16G155100, Glyma.17G139400, Glyma.20G247400
1VS2	Up	GO:0006073	0.00242342	0.966973	3	49	cellular glucan metabolic process	biological_process	Glyma.10G251700, Glyma.19G106700, Glyma.20G141800
1VS2	Up	GO:0016762	0.00257311	0.966973	3	50	xyloglucan:xyloglucosyl transferase activity	molecular_function	Glyma.10G251700, Glyma.19G106700, Glyma.20G141800
1VS2	Up	GO:0008061	0.00415969	1	1	1	chitin binding	molecular_function	XLOC_024782
1VS2	Up	GO:0005618	0.00512444	1	4	128	cell wall	cellular_component	Glyma.10G251700, Glyma.17G059800, Glyma.19G106700, Glyma.20G141800
1VS2	Up	GO:0004805	0.00578411	1	1	1	trehalose-phosphatase activity	molecular_function	XLOC_045925
1VS2	Up	GO:0005992	0.0115421	1	1	2	trehalose biosynthetic process	biological_process	XLOC_045925
1VS2	Up	GO:0046912	0.0166674	1	1	3	transferase activity, transferring acyl groups, acyl groups converted into alkyl on transfer	molecular_function	Glyma.15G140200
1VS2	Up	GO:0006810	0.0189848	1	6	380	transport	biological_process	Glyma.03G227500, Glyma.10G296600, Glyma.13G167700, Glyma.16G155100, Glyma.17G139400, Glyma.20G247400
1VS2	Up	GO:0046686	0.0254597	1	1	5	response to cadmium ion	biological_process	XLOC_045925
1VS2	Up	GO:0006275	0.0282648	1	1	5	regulation of DNA replication	biological_process	XLOC_030410
1VS2	Up	GO:0005975	0.0300158	1	4	212	carbohydrate metabolic process	biological_process	Glyma.05G216400, Glyma.10G251700, Glyma.19G106700, Glyma.20G141800
1VS2	Up	GO:0015996	0.0332419	1	1	6	chlorophyll catabolic process	biological_process	Glyma.07G096900
1VS2	Up	GO:0004421	0.0334043	1	1	6	hydroxymethylglutaryl-CoA synthase activity	molecular_function	Glyma.10G108800
1VS2	Up	GO:0004420	0.0390046	1	1	7	hydroxymethylglutaryl-CoA reductase (NADPH) activity	molecular_function	Glyma.01G156700
1VS2	Up	GO:0015936	0.0390046	1	1	7	coenzyme A metabolic process	biological_process	Glyma.01G156700
1VS2	Up	GO:0016491	0.0393364	1	8	699	oxidoreductase activity	molecular_function	Glyma.03G057100, Glyma.05G125800, Glyma.08G080900, Glyma.12G097700, Glyma.13G030400, Glyma.14G156400, Glyma.14G209400, Glyma.18G225000
1VS2	Up	GO:0004652	0.0454105	1	1	8	polynucleotide adenylyltransferase activity	molecular_function	Glyma.09G107600
1VS2	Up	GO:0050662	0.0466838	1	1	9	coenzyme binding	molecular_function	Glyma.01G156700
1VS2	Up	GO:0016021	0.0488397	1	8	743	integral component of membrane	cellular_component	Glyma.03G113600, Glyma.04G014000, Glyma.09G087200, Glyma.09G087400, Glyma.15G147200, Glyma.16G115500, Glyma.20G246300, XLOC_000412
1VS3	Down	GO:0043565	1.76112e-05	0.0330914	3	38	sequence-specific DNA binding	molecular_function	XLOC_002575, XLOC_004454, XLOC_028335
1VS3	Down	GO:0003825	0.00141253	0.986406	1	1	alpha,alpha-trehalose-phosphate synthase (UDP-forming) activity	molecular_function	XLOC_038060
1VS3	Down	GO:0042335	0.00157489	0.986406	1	1	cuticle development	biological_process	XLOC_028335
1VS3	Down	GO:0005992	0.00280583	1	1	2	trehalose biosynthetic process	biological_process	XLOC_038060
1VS3	Down	GO:0048765	0.00297836	1	1	2	root hair cell differentiation	biological_process	XLOC_028335
1VS3	Down	GO:0003700	0.00458825	1	5	840	transcription factor activity, sequence-specific DNA binding	molecular_function	Glyma.04G218700, Glyma.08G261500, XLOC_002575, XLOC_004454, XLOC_028335
1VS3	Down	GO:0043481	0.00539685	1	1	4	anthocyanin accumulation in tissues in response to UV light	biological_process	XLOC_028335
1VS3	Down	GO:0048364	0.0080859	1	1	6	root development	biological_process	XLOC_028335
1VS3	Down	GO:0009408	0.01268	1	1	10	response to heat	biological_process	XLOC_004454
1VS3	Down	GO:0005634	0.0144032	1	4	700	nucleus	cellular_component	XLOC_002575, XLOC_004454, XLOC_028335, XLOC_030774
1VS3	Down	GO:0006351	0.0158913	1	2	142	transcription, DNA-templated	biological_process	XLOC_002575, XLOC_028335
1VS3	Down	GO:0015074	0.0174462	1	2	169	DNA integration	biological_process	XLOC_005953, XLOC_038535
1VS3	Down	GO:0046872	0.0217782	1	2	173	metal ion binding	molecular_function	XLOC_028041, XLOC_030774
1VS3	Down	GO:0050664	0.024829	1	1	17	oxidoreductase activity, acting on NAD(P)H, oxygen as acceptor	molecular_function	Glyma.20G029600
1VS3	Down	GO:0000272	0.0253527	1	1	18	polysaccharide catabolic process	biological_process	Glyma.01G151800
1VS3	Down	GO:0004721	0.0333114	1	1	27	phosphoprotein phosphatase activity	molecular_function	XLOC_030774
1VS3	Down	GO:0008483	0.0346067	1	1	25	transaminase activity	molecular_function	Glyma.03G040600
1VS3	Down	GO:0003682	0.0353286	1	1	28	chromatin binding	molecular_function	XLOC_029250
1VS3	Up	GO:0010417	0.0026704	0.409112	1	1	glucuronoxylan biosynthetic process	biological_process	XLOC_025547
1VS3	Up	GO:0032504	0.0026704	0.409112	1	1	multicellular organism reproduction	biological_process	XLOC_025547
1VS3	Up	GO:0045489	0.0026704	0.409112	1	1	pectin biosynthetic process	biological_process	XLOC_025547
1VS3	Up	GO:0052386	0.0026704	0.409112	1	1	cell wall thickening	biological_process	XLOC_025547
1VS3	Up	GO:0030665	0.00273714	0.409112	1	1	clathrin-coated vesicle membrane	cellular_component	XLOC_025546
1VS3	Up	GO:0009855	0.00280072	0.409112	1	1	determination of bilateral symmetry	biological_process	XLOC_033852
1VS3	Up	GO:0009880	0.00280072	0.409112	1	1	embryonic pattern specification	biological_process	XLOC_033852
1VS3	Up	GO:0009943	0.00280072	0.409112	1	1	adaxial/abaxial axis specification	biological_process	XLOC_033852
1VS3	Up	GO:0009944	0.00280072	0.409112	1	1	polarity specification of adaxial/abaxial axis	biological_process	XLOC_033852
1VS3	Up	GO:0010014	0.00280072	0.409112	1	1	meristem initiation	biological_process	XLOC_033852
1VS3	Up	GO:0080060	0.00280072	0.409112	1	1	integument development	biological_process	XLOC_033852
1VS3	Up	GO:0006101	0.00283047	0.409112	1	1	citrate metabolic process	biological_process	XLOC_026551
1VS3	Up	GO:0048027	0.00283047	0.409112	1	1	mRNA 5'-UTR binding	molecular_function	XLOC_026551
1VS3	Up	GO:0004805	0.00305563	0.410109	1	1	trehalose-phosphatase activity	molecular_function	XLOC_045925
1VS3	Up	GO:0010287	0.00466734	0.560585	1	2	plastoglobule	cellular_component	XLOC_020313
1VS3	Up	GO:0010072	0.00477348	0.560585	1	2	primary shoot apical meristem specification	biological_process	XLOC_033852
1VS3	Up	GO:0030131	0.00529302	0.572706	1	2	clathrin adaptor complex	cellular_component	XLOC_025546
1VS3	Up	GO:0010051	0.00548628	0.572706	1	2	xylem and phloem pattern formation	biological_process	XLOC_025547
1VS3	Up	GO:0003994	0.00592056	0.573899	1	2	aconitate hydratase activity	molecular_function	XLOC_026551
1VS3	Up	GO:0005992	0.00610856	0.573899	1	2	trehalose biosynthetic process	biological_process	XLOC_045925
1VS3	Up	GO:0030154	0.0106207	0.950297	1	4	cell differentiation	biological_process	XLOC_033852
1VS3	Up	GO:0048366	0.0117451	0.964895	1	5	leaf development	biological_process	XLOC_025547
1VS3	Up	GO:0008479	0.0119783	0.964895	1	4	queuine tRNA-ribosyltransferase activity	molecular_function	Glyma.08G367700
1VS3	Up	GO:0046686	0.0123244	0.964895	1	5	response to cadmium ion	biological_process	XLOC_045925
1VS3	Up	GO:0009694	0.0145881	1	1	5	jasmonic acid metabolic process	biological_process	Glyma.06G243500
1VS3	Up	GO:0009864	0.0145881	1	1	5	induced systemic resistance, jasmonic acid mediated signaling pathway	biological_process	Glyma.06G243500
1VS3	Up	GO:0016772	0.0156342	1	1	5	transferase activity, transferring phosphorus-containing groups	molecular_function	XLOC_020313
1VS3	Up	GO:0031929	0.0160731	1	1	5	TOR signaling	biological_process	Glyma.09G278700
1VS3	Up	GO:0005886	0.0161391	1	2	77	plasma membrane	cellular_component	XLOC_000412, XLOC_026551
1VS3	Up	GO:0015996	0.0173174	1	1	6	chlorophyll catabolic process	biological_process	Glyma.07G096900
1VS3	Up	GO:0004421	0.0174567	1	1	6	hydroxymethylglutaryl-CoA synthase activity	molecular_function	Glyma.10G108800
1VS3	Up	GO:0008026	0.0175322	1	1	6	ATP-dependent helicase activity	molecular_function	Glyma.13G359400
1VS3	Up	GO:0009651	0.0184502	1	1	7	response to salt stress	biological_process	XLOC_026551
1VS3	Up	GO:0009611	0.0203713	1	1	7	response to wounding	biological_process	Glyma.06G243500
1VS3	Up	GO:0006102	0.0212365	1	1	7	isocitrate metabolic process	biological_process	XLOC_026551
1VS3	Up	GO:0005773	0.0255262	1	1	10	vacuole	cellular_component	XLOC_026551
1VS3	Up	GO:0004652	0.0267174	1	1	8	polynucleotide adenylyltransferase activity	molecular_function	Glyma.09G107600
1VS3	Up	GO:0016740	0.0305396	1	1	16	transferase activity	molecular_function	Glyma.09G184300
1VS3	Up	GO:0005730	0.0311649	1	1	13	nucleolus	cellular_component	XLOC_045925
1VS3	Up	GO:0009941	0.0328266	1	1	13	chloroplast envelope	cellular_component	XLOC_020351
1VS3	Up	GO:0016818	0.0338945	1	1	10	hydrolase activity, acting on acid anhydrides, in phosphorus-containing anhydrides	molecular_function	Glyma.13G359400
1VS3	Up	GO:0005794	0.0341154	1	1	13	Golgi apparatus	cellular_component	XLOC_025546
1VS3	Up	GO:0004523	0.0346896	1	1	13	RNA-DNA hybrid ribonuclease activity	molecular_function	XLOC_004560
1VS3	Up	GO:0006400	0.0355342	1	1	12	tRNA modification	biological_process	Glyma.08G367700
1VS3	Up	GO:0048046	0.0360696	1	1	14	apoplast	cellular_component	XLOC_026551
1VS3	Up	GO:0004602	0.0365007	1	1	14	glutathione peroxidase activity	molecular_function	Glyma.01G219500
1VS3	Up	GO:0005801	0.0415865	1	1	15	cis-Golgi network	cellular_component	Glyma.09G274900
1VS3	Up	GO:0003777	0.0452903	1	2	119	microtubule motor activity	molecular_function	Glyma.03G022500, Glyma.04G155500
1VS3	Up	GO:0005871	0.0452903	1	2	119	kinesin complex	cellular_component	Glyma.03G022500, Glyma.04G155500
1VS3	Up	GO:0051539	0.0468473	1	1	19	4 iron, 4 sulfur cluster binding	molecular_function	XLOC_026551
1VS4	Down	GO:0000096	0.000273667	0.0395554	1	1	sulfur amino acid metabolic process	biological_process	XLOC_004227
1VS4	Down	GO:0006636	0.000273667	0.0395554	1	1	unsaturated fatty acid biosynthetic process	biological_process	XLOC_004227
1VS4	Down	GO:0006733	0.000273667	0.0395554	1	1	oxidoreduction coenzyme metabolic process	biological_process	XLOC_004227
1VS4	Down	GO:0006766	0.000273667	0.0395554	1	1	vitamin metabolic process	biological_process	XLOC_004227
1VS4	Down	GO:0009106	0.000273667	0.0395554	1	1	lipoate metabolic process	biological_process	XLOC_004227
1VS4	Down	GO:0009108	0.000273667	0.0395554	1	1	coenzyme biosynthetic process	biological_process	XLOC_004227
1VS4	Down	GO:0009117	0.000273667	0.0395554	1	1	nucleotide metabolic process	biological_process	XLOC_004227
1VS4	Down	GO:0010319	0.000273667	0.0395554	1	1	stromule	cellular_component	XLOC_004227
1VS4	Down	GO:0019216	0.000273667	0.0395554	1	1	regulation of lipid metabolic process	biological_process	XLOC_004227
1VS4	Down	GO:0019748	0.000273667	0.0395554	1	1	secondary metabolic process	biological_process	XLOC_004227
1VS4	Down	GO:0035671	0.000273667	0.0395554	1	1	enone reductase activity	molecular_function	XLOC_004227
1VS4	Down	GO:0035798	0.000273667	0.0395554	1	1	2-alkenal reductase (NADP+) activity	molecular_function	XLOC_004227
1VS4	Down	GO:0044272	0.000273667	0.0395554	1	1	sulfur compound biosynthetic process	biological_process	XLOC_004227
1VS4	Down	GO:0009695	0.000572884	0.0768893	1	2	jasmonic acid biosynthetic process	biological_process	XLOC_004227
1VS4	Down	GO:0019288	0.000787748	0.0955878	1	3	isopentenyl diphosphate biosynthetic process, methylerythritol 4-phosphate pathway	biological_process	XLOC_004227
1VS4	Down	GO:0009072	0.000899453	0.0955878	1	3	aromatic amino acid family metabolic process	biological_process	XLOC_004227
1VS4	Down	GO:0010264	0.00090949	0.0955878	1	3	myo-inositol hexakisphosphate biosynthetic process	biological_process	XLOC_004227
1VS4	Down	GO:0031408	0.000915689	0.0955878	1	3	oxylipin biosynthetic process	biological_process	XLOC_004227
1VS4	Down	GO:0006546	0.00119927	0.118602	1	5	glycine catabolic process	biological_process	XLOC_004227
1VS4	Down	GO:0009416	0.00160396	0.148132	1	5	response to light stimulus	biological_process	XLOC_004227
1VS4	Down	GO:0009579	0.00165555	0.148132	1	5	thylakoid	cellular_component	XLOC_004227
1VS4	Down	GO:0008652	0.00198695	0.169704	1	7	cellular amino acid biosynthetic process	biological_process	XLOC_004227
1VS4	Down	GO:0004066	0.0023552	0.19241	1	8	asparagine synthase (glutamine-hydrolyzing) activity	molecular_function	Glyma.11G170300
1VS4	Down	GO:0015995	0.00273987	0.214254	1	9	chlorophyll biosynthetic process	biological_process	XLOC_004227
1VS4	Down	GO:0016117	0.00285064	0.214254	1	9	carotenoid biosynthetic process	biological_process	XLOC_004227
1VS4	Down	GO:0009941	0.00412686	0.298245	1	13	chloroplast envelope	cellular_component	XLOC_004227
1VS4	Down	GO:0048046	0.00456555	0.317728	1	14	apoplast	cellular_component	XLOC_004227
1VS4	Down	GO:0042742	0.00485856	0.326044	1	15	defense response to bacterium	biological_process	XLOC_004227
1VS4	Down	GO:0009570	0.00674407	0.436969	1	20	chloroplast stroma	cellular_component	XLOC_004227
1VS4	Up	GO:0009055	0.000684517	0.644059	3	119	electron carrier activity	molecular_function	Glyma.02G153000, Glyma.10G021300, Glyma.17G227700
1VS4	Up	GO:0016491	0.00102767	0.644059	6	699	oxidoreductase activity	molecular_function	Glyma.01G222700, Glyma.07G212800, Glyma.11G003200, Glyma.13G030400, Glyma.14G209400, Glyma.17G140600
1VS4	Up	GO:0015035	0.0010283	0.644059	3	137	protein disulfide oxidoreductase activity	molecular_function	Glyma.02G153000, Glyma.10G021300, Glyma.17G227700
1VS4	Up	GO:0016765	0.00404906	1	1	2	transferase activity, transferring alkyl or aryl (other than methyl) groups	molecular_function	Glyma.15G243100
1VS4	Up	GO:0007018	0.0160012	1	2	115	microtubule-based movement	biological_process	Glyma.06G042400, Glyma.15G043400
1VS4	Up	GO:0003777	0.0170648	1	2	119	microtubule motor activity	molecular_function	Glyma.06G042400, Glyma.15G043400
1VS4	Up	GO:0005871	0.0170648	1	2	119	kinesin complex	cellular_component	Glyma.06G042400, Glyma.15G043400
1VS4	Up	GO:0050664	0.0338395	1	1	17	oxidoreductase activity, acting on NAD(P)H, oxygen as acceptor	molecular_function	Glyma.01G222700
1VS4	Up	GO:0051536	0.0365074	1	1	20	iron-sulfur cluster binding	molecular_function	Glyma.07G212800
1VS4	Up	GO:0008168	0.0383947	1	1	25	methyltransferase activity	molecular_function	Glyma.04G032000
1VS4	Up	GO:0019752	0.0493793	1	1	28	carboxylic acid metabolic process	biological_process	Glyma.17G140600
1VS5	Down	GO:0009523	5.32088e-11	7.91781e-08	12	66	photosystem II	cellular_component	Glyma.02G141700, Glyma.04G014500, Glyma.04G241000, Glyma.05G172300, Glyma.09G073900, Glyma.10G290700, Glyma.15G208300, Glyma.15G273300, Glyma.18G046700, Glyma.19G126700, XLOC_019823, XLOC_034334
1VS5	Down	GO:0015979	8.42768e-11	7.91781e-08	13	87	photosynthesis	biological_process	Glyma.04G014500, Glyma.04G241000, Glyma.05G172300, Glyma.09G073900, Glyma.09G087700, Glyma.09G090100, Glyma.10G290700, Glyma.15G208300, Glyma.15G273300, Glyma.18G046700, Glyma.19G126700, Glyma.U016600, XLOC_009133
1VS5	Down	GO:0009535	8.15939e-08	5.1105e-05	7	29	chloroplast thylakoid membrane	cellular_component	XLOC_009133, XLOC_016679, XLOC_019823, XLOC_026945, XLOC_034214, XLOC_034334, XLOC_042521
1VS5	Down	GO:0008610	3.34672e-06	0.00156746	6	35	lipid biosynthetic process	biological_process	Glyma.02G001500, Glyma.06G058500, Glyma.10G274400, Glyma.12G075100, Glyma.20G115500, Glyma.20G240900
1VS5	Down	GO:0009522	4.35149e-06	0.00156746	6	33	photosystem I	cellular_component	Glyma.07G019700, Glyma.09G087700, Glyma.09G090100, Glyma.13G129500, Glyma.U016600, XLOC_009133
1VS5	Down	GO:0009765	5.0052e-06	0.00156746	6	34	photosynthesis, light harvesting	biological_process	Glyma.06G194900, Glyma.08G074000, Glyma.12G219300, Glyma.13G282000, Glyma.15G179400, Glyma.20G212900
1VS5	Down	GO:0006633	1.24918e-05	0.00305702	7	64	fatty acid biosynthetic process	biological_process	Glyma.02G001500, Glyma.06G058500, Glyma.06G118500, Glyma.10G274400, Glyma.12G075100, Glyma.20G115500, Glyma.20G240900
1VS5	Down	GO:0009654	1.30155e-05	0.00305702	6	40	photosystem II oxygen evolving complex	cellular_component	Glyma.04G014500, Glyma.04G241000, Glyma.10G290700, Glyma.15G273300, Glyma.18G046700, Glyma.19G126700
1VS5	Down	GO:0018298	4.52363e-05	0.00944433	4	18	protein-chromophore linkage	biological_process	Glyma.03G227300, XLOC_009133, XLOC_019823, XLOC_034334
1VS5	Down	GO:0019684	0.000267147	0.0501969	3	10	photosynthesis, light reaction	biological_process	Glyma.06G217900, XLOC_026945, XLOC_042521
1VS5	Down	GO:0009772	0.0003637	0.0621265	3	11	photosynthetic electron transport in photosystem II	biological_process	Glyma.06G217900, XLOC_019823, XLOC_034334
1VS5	Down	GO:0042132	0.000458754	0.0718332	3	12	fructose 1,6-bisphosphate 1-phosphatase activity	molecular_function	Glyma.07G142700, Glyma.10G225400, Glyma.18G193600
1VS5	Down	GO:0016168	0.000618035	0.0893299	3	13	chlorophyll binding	molecular_function	XLOC_009133, XLOC_019823, XLOC_034334
1VS5	Down	GO:0005509	0.00101444	0.136152	6	92	calcium ion binding	molecular_function	Glyma.04G014500, Glyma.04G241000, Glyma.10G290700, Glyma.15G273300, Glyma.18G046700, Glyma.19G126700
1VS5	Down	GO:0009579	0.00156724	0.196323	2	5	thylakoid	cellular_component	Glyma.09G090100, Glyma.U016600
1VS5	Down	GO:0010207	0.00173013	0.203182	2	5	photosystem II assembly	biological_process	Glyma.12G200200, Glyma.13G302100
1VS5	Down	GO:0045156	0.00259906	0.287273	2	6	electron transporter, transferring electrons within the cyclic electron transport pathway of photosynthesis activity	molecular_function	XLOC_019823, XLOC_034334
1VS5	Down	GO:0008289	0.00606633	0.633258	3	38	lipid binding	molecular_function	Glyma.07G076800, Glyma.12G194400, Glyma.13G308200
1VS5	Down	GO:0009507	0.00647869	0.640708	5	90	chloroplast	cellular_component	Glyma.02G141700, Glyma.12G178800, XLOC_009133, XLOC_014132, XLOC_016679
1VS5	Down	GO:0016655	0.00751307	0.705853	2	10	oxidoreductase activity, acting on NAD(P)H, quinone or similar compound as acceptor	molecular_function	XLOC_026945, XLOC_042521
1VS5	Down	GO:0006090	0.0115046	0.959623	1	2	pyruvate metabolic process	biological_process	Glyma.07G253700
1VS5	Down	GO:0050242	0.0115046	0.959623	1	2	pyruvate, phosphate dikinase activity	molecular_function	Glyma.07G253700
1VS5	Down	GO:0046933	0.0117463	0.959623	2	14	proton-transporting ATP synthase activity, rotational mechanism	molecular_function	XLOC_016679, XLOC_034214
1VS5	Down	GO:0009538	0.0124743	0.976633	2	13	photosystem I reaction center	cellular_component	Glyma.07G019700, Glyma.13G129500
1VS5	Down	GO:0045017	0.0134342	1	1	1	glycerolipid biosynthetic process	biological_process	Glyma.12G114900
1VS5	Down	GO:0016020	0.0138469	1	15	690	membrane	cellular_component	Glyma.01G058600, Glyma.02G001500, Glyma.06G058500, Glyma.06G118500, Glyma.08G050500, Glyma.08G070800, Glyma.08G282600, Glyma.10G274400, Glyma.11G169900, Glyma.12G075100, Glyma.16G209400, Glyma.19G202200, Glyma.20G115500, Glyma.20G187400, Glyma.20G240900
1VS5	Down	GO:0016310	0.0158881	1	1	3	phosphorylation	biological_process	Glyma.07G253700
1VS5	Down	GO:0006298	0.0176684	1	2	20	mismatch repair	biological_process	Glyma.10G121600, Glyma.14G188900
1VS5	Down	GO:0071949	0.0197596	1	1	2	FAD binding	molecular_function	Glyma.17G174500
1VS5	Down	GO:0032502	0.0224459	1	2	19	developmental process	biological_process	Glyma.04G230600, Glyma.06G134600
1VS5	Down	GO:0009635	0.0266895	1	1	2	response to herbicide	biological_process	XLOC_034334
1VS5	Down	GO:0010242	0.0266895	1	1	2	oxygen evolving activity	molecular_function	XLOC_034334
1VS5	Down	GO:0045263	0.0266895	1	1	2	proton-transporting ATP synthase complex, coupling factor F(o)	cellular_component	XLOC_034214
1VS5	Down	GO:0006468	0.0267491	1	10	520	protein phosphorylation	biological_process	Glyma.04G139100, Glyma.04G244000, Glyma.06G257500, Glyma.08G061000, Glyma.08G066000, Glyma.08G307400, Glyma.12G140200, Glyma.15G021300, Glyma.15G227000, Glyma.16G065700
1VS5	Down	GO:0015986	0.0275585	1	2	21	ATP synthesis coupled proton transport	biological_process	XLOC_016679, XLOC_034214
1VS5	Down	GO:0048544	0.0360149	1	2	30	recognition of pollen	biological_process	Glyma.04G139100, Glyma.08G061000
1VS5	Down	GO:0048038	0.0366411	1	2	26	quinone binding	molecular_function	XLOC_026945, XLOC_042521
1VS5	Down	GO:0008864	0.0396727	1	1	3	formyltetrahydrofolate deformylase activity	molecular_function	Glyma.05G060500
1VS5	Down	GO:0034599	0.0397584	1	1	3	cellular response to oxidative stress	biological_process	Glyma.12G178800
1VS5	Down	GO:0071486	0.0397584	1	1	3	cellular response to high light intensity	biological_process	Glyma.12G178800
1VS5	Down	GO:0016021	0.0480106	1	14	743	integral component of membrane	cellular_component	Glyma.05G172300, Glyma.06G317100, Glyma.11G066500, Glyma.15G208300, Glyma.16G114900, Glyma.16G180900, Glyma.17G157300, Glyma.18G066000, XLOC_009133, XLOC_019823, XLOC_026945, XLOC_034214, XLOC_034334, XLOC_042521
1VS5	Up	GO:0020037	1.39052e-16	2.61278e-13	48	455	heme binding	molecular_function	Glyma.01G130500, Glyma.01G130800, Glyma.01G179600, Glyma.01G192500, Glyma.02G008900, Glyma.02G052700, Glyma.02G135100, Glyma.02G233800, Glyma.02G298800, Glyma.03G160300, Glyma.04G035000, Glyma.05G170400, Glyma.06G221700, Glyma.07G010700, Glyma.07G212800, Glyma.08G243600, Glyma.09G048700, Glyma.09G049200, Glyma.09G057100, Glyma.09G277900, Glyma.09G279100, Glyma.09G284400, Glyma.09G284700, Glyma.10…
1VS5	Up	GO:0004601	7.95488e-13	7.47361e-10	25	164	peroxidase activity	molecular_function	Glyma.01G130500, Glyma.01G130800, Glyma.01G192500, Glyma.01G222700, Glyma.02G008900, Glyma.02G052700, Glyma.02G135100, Glyma.02G233800, Glyma.06G221700, Glyma.09G057100, Glyma.09G277900, Glyma.09G284400, Glyma.09G284700, Glyma.10G009400, Glyma.10G191700, Glyma.11G162100, Glyma.12G195600, Glyma.13G306900, Glyma.13G307000, Glyma.14G201700, Glyma.16G055900, Glyma.17G052900, Glyma.17G061400, Glyma.18…
1VS5	Up	GO:0006979	4.08898e-12	2.56106e-09	25	178	response to oxidative stress	biological_process	Glyma.01G130500, Glyma.01G130800, Glyma.01G192500, Glyma.01G219400, Glyma.02G008900, Glyma.02G052700, Glyma.02G135100, Glyma.02G233800, Glyma.06G221700, Glyma.09G057100, Glyma.09G277900, Glyma.09G284400, Glyma.09G284700, Glyma.10G009400, Glyma.10G191700, Glyma.11G162100, Glyma.12G195600, Glyma.13G306900, Glyma.13G307000, Glyma.14G201700, Glyma.16G055900, Glyma.17G052900, Glyma.17G061400, Glyma.18…
1VS5	Up	GO:0003700	1.66254e-06	0.000780976	47	840	transcription factor activity, sequence-specific DNA binding	molecular_function	Glyma.01G022500, Glyma.01G195900, Glyma.01G232000, Glyma.03G111700, Glyma.03G128200, Glyma.03G135800, Glyma.03G142400, Glyma.03G157300, Glyma.03G162500, Glyma.04G057700, Glyma.04G173500, Glyma.04G201900, Glyma.04G217400, Glyma.04G251400, Glyma.06G058400, Glyma.06G148400, Glyma.06G163700, Glyma.07G156200, Glyma.08G254400, Glyma.08G257300, Glyma.08G320200, Glyma.09G029800, Glyma.09G199800, Glyma.09…
1VS5	Up	GO:0016491	2.09073e-06	0.000785697	41	699	oxidoreductase activity	molecular_function	Glyma.01G155400, Glyma.01G219400, Glyma.01G222700, Glyma.02G010100, Glyma.03G057100, Glyma.03G099000, Glyma.04G019500, Glyma.04G121700, Glyma.05G124800, Glyma.05G124900, Glyma.05G222400, Glyma.07G129000, Glyma.07G142600, Glyma.07G150900, Glyma.07G212800, Glyma.08G039300, Glyma.08G080900, Glyma.08G092800, Glyma.08G169300, Glyma.08G169700, Glyma.08G169900, Glyma.08G351800, Glyma.08G351900, Glyma.09…
1VS5	Up	GO:0016705	4.19546e-06	0.00131388	23	293	oxidoreductase activity, acting on paired donors, with incorporation or reduction of molecular oxygen	molecular_function	Glyma.01G179600, Glyma.02G298800, Glyma.03G160300, Glyma.04G035000, Glyma.05G170400, Glyma.07G010700, Glyma.08G243600, Glyma.09G048700, Glyma.09G049200, Glyma.09G279100, Glyma.10G234700, Glyma.11G062500, Glyma.11G062700, Glyma.15G156100, Glyma.15G243300, Glyma.15G245300, Glyma.17G015400, Glyma.19G003600, Glyma.19G014600, Glyma.20G114200, Glyma.20G147900, Glyma.20G159700, Glyma.U000100
1VS5	Up	GO:0015238	4.30792e-05	0.00956974	10	79	drug transmembrane transporter activity	molecular_function	Glyma.05G001700, Glyma.05G054100, Glyma.09G102800, Glyma.09G146800, Glyma.10G239000, Glyma.15G274600, Glyma.17G136400, Glyma.17G136500, Glyma.20G123400, Glyma.20G155500
1VS5	Up	GO:0005506	4.71598e-05	0.00956974	23	347	iron ion binding	molecular_function	Glyma.01G179600, Glyma.02G298800, Glyma.03G160300, Glyma.04G035000, Glyma.05G170400, Glyma.07G010700, Glyma.08G243600, Glyma.09G048700, Glyma.09G049200, Glyma.09G279100, Glyma.10G234700, Glyma.11G062500, Glyma.11G062700, Glyma.15G156100, Glyma.15G243300, Glyma.15G245300, Glyma.17G015400, Glyma.19G003600, Glyma.19G014600, Glyma.20G114200, Glyma.20G147900, Glyma.20G159700, Glyma.U000100
1VS5	Up	GO:0006855	4.77389e-05	0.00956974	10	79	drug transmembrane transport	biological_process	Glyma.05G001700, Glyma.05G054100, Glyma.09G102800, Glyma.09G146800, Glyma.10G239000, Glyma.15G274600, Glyma.17G136400, Glyma.17G136500, Glyma.20G123400, Glyma.20G155500
1VS5	Up	GO:0015297	5.093e-05	0.00956974	10	81	antiporter activity	molecular_function	Glyma.05G001700, Glyma.05G054100, Glyma.09G102800, Glyma.09G146800, Glyma.10G239000, Glyma.15G274600, Glyma.17G136400, Glyma.17G136500, Glyma.20G123400, Glyma.20G155500
1VS5	Up	GO:0008171	0.000252955	0.0432093	6	33	O-methyltransferase activity	molecular_function	Glyma.04G227700, Glyma.09G094400, Glyma.09G094600, Glyma.10G176500, Glyma.11G256500, Glyma.18G269600
1VS5	Up	GO:0016020	0.00102968	0.16123	33	690	membrane	cellular_component	Glyma.03G168000, Glyma.03G222300, Glyma.03G264100, Glyma.04G055200, Glyma.04G250900, Glyma.05G001700, Glyma.05G054100, Glyma.06G111900, Glyma.06G324300, Glyma.08G180400, Glyma.08G290600, Glyma.09G102800, Glyma.09G146800, Glyma.10G239000, Glyma.12G191500, Glyma.13G004400, Glyma.13G081000, Glyma.13G227100, Glyma.13G338300, Glyma.13G355000, Glyma.14G148300, Glyma.15G036200, Glyma.15G274600, Glyma.16…
1VS5	Up	GO:0006952	0.00172567	0.249425	7	71	defense response	biological_process	Glyma.01G165200, Glyma.06G249800, Glyma.11G078000, Glyma.15G217100, Glyma.15G218900, Glyma.15G274200, XLOC_024782
1VS5	Up	GO:0008219	0.00249433	0.334775	2	3	cell death	biological_process	XLOC_016210, XLOC_028354
1VS5	Up	GO:0005452	0.00399981	0.469727	3	13	inorganic anion exchanger activity	molecular_function	Glyma.03G222300, Glyma.17G088800, Glyma.19G219500
1VS5	Up	GO:0006820	0.00399981	0.469727	3	13	anion transport	biological_process	Glyma.03G222300, Glyma.17G088800, Glyma.19G219500
1VS5	Up	GO:0030599	0.00441913	0.481631	6	63	pectinesterase activity	molecular_function	Glyma.01G138000, Glyma.02G086900, Glyma.03G216000, Glyma.10G017200, Glyma.19G212500, Glyma.19G231300
1VS5	Up	GO:0050660	0.00461381	0.481631	8	100	flavin adenine dinucleotide binding	molecular_function	Glyma.02G108400, Glyma.04G079700, Glyma.05G124800, Glyma.05G124900, Glyma.08G080900, Glyma.15G132600, Glyma.16G019900, Glyma.17G054600
1VS5	Up	GO:0005618	0.00542891	0.53689	9	128	cell wall	cellular_component	Glyma.01G138000, Glyma.02G086900, Glyma.03G216000, Glyma.10G017200, Glyma.17G059800, Glyma.17G064900, Glyma.19G106700, Glyma.19G212500, Glyma.19G231300
1VS5	Up	GO:0042545	0.0076993	0.723349	5	50	cell wall modification	biological_process	Glyma.01G138000, Glyma.03G216000, Glyma.10G017200, Glyma.19G212500, Glyma.19G231300
1VS5	Up	GO:0008061	0.0113475	0.98501	1	1	chitin binding	molecular_function	XLOC_024782
1VS5	Up	GO:0006096	0.0115329	0.98501	4	32	glycolytic process	biological_process	Glyma.04G104500, Glyma.10G201100, Glyma.19G190100, Glyma.20G136200
1VS5	Up	GO:0005507	0.0139026	1	6	75	copper ion binding	molecular_function	Glyma.04G019500, Glyma.07G142600, Glyma.12G097700, Glyma.17G019300, Glyma.18G193400, Glyma.20G145100
1VS5	Up	GO:0006810	0.0151103	1	18	380	transport	biological_process	Glyma.02G073700, Glyma.05G162500, Glyma.07G018000, Glyma.07G023600, Glyma.08G218200, Glyma.08G290600, Glyma.10G005400, Glyma.10G221100, Glyma.10G227400, Glyma.11G224100, Glyma.11G228000, Glyma.13G119000, Glyma.16G078100, Glyma.17G148600, Glyma.18G259500, Glyma.18G263200, Glyma.19G016400, Glyma.20G170400
1VS5	Up	GO:0015299	0.0177572	1	4	37	solute:proton antiporter activity	molecular_function	Glyma.03G171600, Glyma.04G212200, Glyma.06G154200, Glyma.07G251900
1VS5	Up	GO:0006468	0.0193699	1	23	520	protein phosphorylation	biological_process	Glyma.03G003300, Glyma.04G053100, Glyma.06G117900, Glyma.06G211600, Glyma.06G220200, Glyma.06G256400, Glyma.07G069000, Glyma.08G235800, Glyma.08G357200, Glyma.09G243600, Glyma.10G271900, Glyma.12G007300, Glyma.12G142400, Glyma.13G106500, Glyma.13G300000, Glyma.14G118800, Glyma.14G157600, Glyma.15G021800, Glyma.15G021900, Glyma.15G069500, Glyma.16G092600, Glyma.18G249700, Glyma.19G261700
1VS5	Up	GO:0010181	0.0230101	1	3	23	FMN binding	molecular_function	Glyma.13G186200, Glyma.15G223900, Glyma.17G049900
1VS5	Up	GO:0000150	0.027504	1	1	1	recombinase activity	molecular_function	XLOC_031781
1VS5	Up	GO:0033063	0.027504	1	1	1	Rad51B-Rad51C-Rad51D-XRCC2 complex	cellular_component	XLOC_031781
1VS5	Up	GO:0004743	0.0279142	1	3	23	pyruvate kinase activity	molecular_function	Glyma.10G201100, Glyma.19G190100, Glyma.20G136200
1VS5	Up	GO:0009349	0.0283509	1	1	1	riboflavin synthase complex	cellular_component	XLOC_010715
1VS5	Up	GO:0010154	0.0296938	1	1	1	fruit development	biological_process	XLOC_028354
1VS5	Up	GO:0032441	0.0296938	1	1	1	pheophorbide a oxygenase activity	molecular_function	XLOC_028354
1VS5	Up	GO:0007275	0.0310277	1	4	44	multicellular organismal development	biological_process	Glyma.01G022500, Glyma.01G195900, Glyma.09G199800, Glyma.11G045800
1VS5	Up	GO:0005215	0.0312034	1	12	244	transporter activity	molecular_function	Glyma.02G073700, Glyma.05G162500, Glyma.07G018000, Glyma.07G023600, Glyma.08G218200, Glyma.08G290600, Glyma.10G005400, Glyma.10G221100, Glyma.11G224100, Glyma.11G228000, Glyma.18G259500, Glyma.20G170400
1VS5	Up	GO:0006351	0.0333739	1	8	142	transcription, DNA-templated	biological_process	Glyma.01G162200, Glyma.03G128200, Glyma.03G142400, Glyma.10G092100, Glyma.11G183700, Glyma.13G316900, Glyma.19G145300, XLOC_016210
1VS5	Up	GO:0006812	0.0334891	1	5	66	cation transport	biological_process	Glyma.03G171600, Glyma.04G212200, Glyma.06G154200, Glyma.07G251900, Glyma.09G099500
1VS5	Up	GO:0004568	0.0414422	1	2	12	chitinase activity	molecular_function	Glyma.12G049100, Glyma.19G221800
1VS5	Up	GO:0006032	0.0414422	1	2	12	chitin catabolic process	biological_process	Glyma.12G049100, Glyma.19G221800
1VS5	Up	GO:0016021	0.0453652	1	27	743	integral component of membrane	cellular_component	Glyma.03G171600, Glyma.04G027300, Glyma.04G102600, Glyma.04G171800, Glyma.04G212200, Glyma.06G103900, Glyma.06G154200, Glyma.07G102500, Glyma.07G251900, Glyma.09G099500, Glyma.10G006700, Glyma.10G227400, Glyma.11G195200, Glyma.12G176900, Glyma.13G119000, Glyma.13G213300, Glyma.13G227100, Glyma.13G323800, Glyma.14G074100, Glyma.14G101100, Glyma.15G147200, Glyma.16G078100, Glyma.16G216500, Glyma.18…
1VS5	Up	GO:0004519	0.0468177	1	3	33	endonuclease activity	molecular_function	Glyma.07G050300, XLOC_016623, XLOC_040846
1VS5	Up	GO:0009308	0.0470622	1	2	14	amine metabolic process	biological_process	Glyma.17G019300, Glyma.20G145100
1VS6	Down	GO:0015979	2.68361e-09	5.0425e-06	12	87	photosynthesis	biological_process	Glyma.04G014500, Glyma.05G172300, Glyma.09G073900, Glyma.09G090100, Glyma.10G290700, Glyma.13G232500, Glyma.15G253700, Glyma.15G273300, Glyma.18G046700, Glyma.19G126700, Glyma.U016600, XLOC_009133
1VS6	Down	GO:0009535	5.29443e-08	4.5411e-05	6	29	chloroplast thylakoid membrane	cellular_component	XLOC_009133, XLOC_016679, XLOC_019823, XLOC_026945, XLOC_034214, XLOC_042521
1VS6	Down	GO:0009522	7.2503e-08	4.5411e-05	7	33	photosystem I	cellular_component	Glyma.07G019700, Glyma.08G204800, Glyma.09G090100, Glyma.13G357300, Glyma.20G144700, Glyma.U016600, XLOC_009133
1VS6	Down	GO:0009523	3.02724e-07	0.000142205	9	66	photosystem II	cellular_component	Glyma.04G014500, Glyma.05G172300, Glyma.09G073900, Glyma.10G290700, Glyma.15G253700, Glyma.15G273300, Glyma.18G046700, Glyma.19G126700, XLOC_019823
1VS6	Down	GO:0019684	3.85549e-07	0.000144889	4	10	photosynthesis, light reaction	biological_process	Glyma.04G095000, Glyma.06G217900, XLOC_026945, XLOC_042521
1VS6	Down	GO:0006633	8.37804e-06	0.00262372	8	64	fatty acid biosynthetic process	biological_process	Glyma.06G012500, Glyma.06G058500, Glyma.06G118500, Glyma.10G274400, Glyma.12G075100, Glyma.17G069100, Glyma.20G115500, Glyma.20G240900
1VS6	Down	GO:0009765	1.94457e-05	0.00521979	6	34	photosynthesis, light harvesting	biological_process	Glyma.07G047600, Glyma.12G219300, Glyma.13G282000, Glyma.15G052400, Glyma.15G179400, Glyma.20G212900
1VS6	Down	GO:0008610	2.4487e-05	0.00575139	6	35	lipid biosynthetic process	biological_process	Glyma.06G012500, Glyma.06G058500, Glyma.10G274400, Glyma.12G075100, Glyma.20G115500, Glyma.20G240900
1VS6	Down	GO:0009538	3.42132e-05	0.00714296	4	13	photosystem I reaction center	cellular_component	Glyma.07G019700, Glyma.08G204800, Glyma.13G357300, Glyma.20G144700
1VS6	Down	GO:0009654	4.04818e-05	0.00760653	6	40	photosystem II oxygen evolving complex	cellular_component	Glyma.04G014500, Glyma.10G290700, Glyma.15G253700, Glyma.15G273300, Glyma.18G046700, Glyma.19G126700
1VS6	Down	GO:0009772	4.73622e-05	0.00809033	3	11	photosynthetic electron transport in photosystem II	biological_process	Glyma.04G095000, Glyma.06G217900, XLOC_019823
1VS6	Down	GO:0016168	0.000102304	0.0160191	3	13	chlorophyll binding	molecular_function	Glyma.08G281300, XLOC_009133, XLOC_019823
1VS6	Down	GO:0016020	0.000124631	0.018014	26	690	membrane	cellular_component	Glyma.01G058600, Glyma.04G240000, Glyma.04G240100, Glyma.06G012500, Glyma.06G058500, Glyma.06G106200, Glyma.06G118500, Glyma.08G050500, Glyma.08G241600, Glyma.08G281300, Glyma.08G282600, Glyma.09G160000, Glyma.10G028900, Glyma.10G274400, Glyma.11G169900, Glyma.12G020400, Glyma.12G075100, Glyma.12G133700, Glyma.12G170500, Glyma.13G275400, Glyma.15G236100, Glyma.16G209400, Glyma.18G019000, Glyma.19…
1VS6	Down	GO:0009507	0.000448055	0.0601354	6	90	chloroplast	cellular_component	Glyma.10G028900, Glyma.12G178800, XLOC_009133, XLOC_014132, XLOC_014230, XLOC_016679
1VS6	Down	GO:0046933	0.000648653	0.0812546	3	14	proton-transporting ATP synthase activity, rotational mechanism	molecular_function	Glyma.02G184000, XLOC_016679, XLOC_034214
1VS6	Down	GO:0009579	0.000699605	0.0821599	2	5	thylakoid	cellular_component	Glyma.09G090100, Glyma.U016600
1VS6	Down	GO:0018298	0.00116043	0.128261	3	18	protein-chromophore linkage	biological_process	Glyma.03G227300, XLOC_009133, XLOC_019823
1VS6	Down	GO:0004332	0.00140551	0.14672	3	13	fructose-bisphosphate aldolase activity	molecular_function	Glyma.11G111100, Glyma.11G111400, Glyma.12G037400
1VS6	Down	GO:0015986	0.00249662	0.246902	3	21	ATP synthesis coupled proton transport	biological_process	Glyma.02G184000, XLOC_016679, XLOC_034214
1VS6	Down	GO:0008289	0.0033299	0.312844	4	38	lipid binding	molecular_function	Glyma.03G016600, Glyma.07G076800, Glyma.12G194400, Glyma.13G308200
1VS6	Down	GO:0004061	0.00416995	0.373111	2	6	arylformamidase activity	molecular_function	Glyma.10G263400, Glyma.20G126800
1VS6	Down	GO:0016620	0.00451552	0.385666	3	20	oxidoreductase activity, acting on the aldehyde or oxo group of donors, NAD or NADP as acceptor	molecular_function	Glyma.04G015900, Glyma.16G044900, Glyma.19G106800
1VS6	Down	GO:0016655	0.00694436	0.567324	2	10	oxidoreductase activity, acting on NAD(P)H, quinone or similar compound as acceptor	molecular_function	XLOC_026945, XLOC_042521
1VS6	Down	GO:0045263	0.00821558	0.643211	1	2	proton-transporting ATP synthase complex, coupling factor F(o)	cellular_component	XLOC_034214
1VS6	Down	GO:0009408	0.00921928	0.692921	2	10	response to heat	biological_process	XLOC_001320, XLOC_004454
1VS6	Down	GO:0045261	0.00980325	0.708473	2	11	proton-transporting ATP synthase complex, catalytic core F(1)	cellular_component	Glyma.02G184000, XLOC_016679
1VS6	Down	GO:0016705	0.0111812	0.769954	11	293	oxidoreductase activity, acting on paired donors, with incorporation or reduction of molecular oxygen	molecular_function	Glyma.02G119600, Glyma.02G256800, Glyma.03G030900, Glyma.05G042500, Glyma.13G262100, Glyma.14G117200, Glyma.19G015000, Glyma.19G258700, Glyma.20G007200, Glyma.20G018600, Glyma.20G188000
1VS6	Down	GO:0015116	0.0114735	0.769954	3	26	sulfate transmembrane transporter activity	molecular_function	Glyma.06G106200, Glyma.10G028900, Glyma.18G019000
1VS6	Down	GO:0008272	0.0129122	0.808296	3	28	sulfate transport	biological_process	Glyma.06G106200, Glyma.10G028900, Glyma.18G019000
1VS6	Down	GO:0005506	0.0131241	0.808296	12	347	iron ion binding	molecular_function	Glyma.02G119600, Glyma.02G256800, Glyma.03G030900, Glyma.05G042500, Glyma.13G262100, Glyma.14G117200, Glyma.17G069100, Glyma.19G015000, Glyma.19G258700, Glyma.20G007200, Glyma.20G018600, Glyma.20G188000
1VS6	Down	GO:0009058	0.0133354	0.808296	6	114	biosynthetic process	biological_process	Glyma.07G258500, Glyma.08G269600, Glyma.09G070500, Glyma.11G028200, Glyma.13G001200, Glyma.17G015600
1VS6	Down	GO:0008271	0.0140929	0.827515	3	30	secondary active sulfate transmembrane transporter activity	molecular_function	Glyma.06G106200, Glyma.10G028900, Glyma.18G019000
1VS6	Down	GO:0045017	0.0165175	0.914877	1	1	glycerolipid biosynthetic process	biological_process	Glyma.12G114900
1VS6	Down	GO:0005509	0.0165545	0.914877	5	92	calcium ion binding	molecular_function	Glyma.04G014500, Glyma.10G290700, Glyma.15G273300, Glyma.18G046700, Glyma.19G126700
1VS6	Down	GO:0042132	0.0175716	0.943344	2	12	fructose 1,6-bisphosphate 1-phosphatase activity	molecular_function	Glyma.07G142700, Glyma.18G193600
1VS6	Down	GO:0046872	0.018642	0.973008	7	173	metal ion binding	molecular_function	Glyma.10G117100, Glyma.11G130200, Glyma.12G178800, Glyma.16G089000, XLOC_009133, XLOC_019823, XLOC_028041
1VS6	Down	GO:0006801	0.0238769	1	2	14	superoxide metabolic process	biological_process	Glyma.10G117100, Glyma.12G178800
1VS6	Down	GO:0043565	0.0262255	1	3	38	sequence-specific DNA binding	molecular_function	Glyma.01G044600, Glyma.08G295800, XLOC_004454
1VS6	Down	GO:0045156	0.0310472	1	1	6	electron transporter, transferring electrons within the cyclic electron transport pathway of photosynthesis activity	molecular_function	XLOC_019823
1VS6	Down	GO:0008360	0.0313258	1	1	2	regulation of cell shape	biological_process	XLOC_029769
1VS6	Down	GO:0016021	0.0342399	1	19	743	integral component of membrane	cellular_component	Glyma.03G014000, Glyma.03G241000, Glyma.05G172300, Glyma.06G317100, Glyma.08G098400, Glyma.11G066500, Glyma.11G134700, Glyma.11G175800, Glyma.13G131200, Glyma.15G236100, Glyma.16G180900, Glyma.18G066000, Glyma.20G096400, XLOC_009133, XLOC_019823, XLOC_026945, XLOC_029769, XLOC_034214, XLOC_042521
1VS6	Down	GO:0048038	0.0346695	1	2	26	quinone binding	molecular_function	XLOC_026945, XLOC_042521
1VS6	Down	GO:0000175	0.0347827	1	1	2	3'-5'-exoribonuclease activity	molecular_function	Glyma.19G005800
1VS6	Down	GO:0004077	0.0348052	1	1	2	biotin-[acetyl-CoA-carboxylase] ligase activity	molecular_function	Glyma.06G109600
1VS6	Down	GO:0071949	0.0371372	1	1	2	FAD binding	molecular_function	Glyma.17G174500
1VS6	Down	GO:0009521	0.0373119	1	1	4	photosystem	cellular_component	Glyma.08G281300
1VS6	Down	GO:0009767	0.0373119	1	1	4	photosynthetic electron transport chain	biological_process	Glyma.08G281300
1VS6	Down	GO:0005216	0.0387277	1	3	43	ion channel activity	molecular_function	Glyma.08G241600, Glyma.12G133700, Glyma.12G170500
1VS6	Down	GO:0006811	0.0445767	1	3	45	ion transport	biological_process	Glyma.08G241600, Glyma.12G133700, Glyma.12G170500
1VS6	Down	GO:0005381	0.0466305	1	1	4	iron ion transmembrane transporter activity	molecular_function	Glyma.20G096400
1VS6	Down	GO:0034599	0.0480985	1	1	3	cellular response to oxidative stress	biological_process	Glyma.12G178800
1VS6	Down	GO:0071486	0.0480985	1	1	3	cellular response to high light intensity	biological_process	Glyma.12G178800
1VS6	Up	GO:0004601	2.7351e-11	3.41021e-08	22	164	peroxidase activity	molecular_function	Glyma.01G130500, Glyma.01G192500, Glyma.01G222700, Glyma.02G008900, Glyma.02G052700, Glyma.02G135100, Glyma.02G233800, Glyma.09G057100, Glyma.09G277900, Glyma.09G284400, Glyma.09G284700, Glyma.10G009400, Glyma.10G191700, Glyma.11G162100, Glyma.13G307000, Glyma.14G201700, Glyma.16G055900, Glyma.17G036200, Glyma.17G052900, Glyma.17G061400, Glyma.18G055500, Glyma.20G214200
1VS6	Up	GO:0020037	3.62981e-11	3.41021e-08	37	455	heme binding	molecular_function	Glyma.01G130500, Glyma.01G192500, Glyma.02G008900, Glyma.02G052700, Glyma.02G135100, Glyma.02G233800, Glyma.02G298800, Glyma.04G035000, Glyma.05G170400, Glyma.07G010700, Glyma.08G274500, Glyma.09G048700, Glyma.09G049200, Glyma.09G057100, Glyma.09G277900, Glyma.09G284400, Glyma.09G284700, Glyma.10G009400, Glyma.10G191700, Glyma.10G234700, Glyma.11G062500, Glyma.11G062700, Glyma.11G162100, Glyma.13…
1VS6	Up	GO:0006979	1.30062e-10	8.1462e-08	22	178	response to oxidative stress	biological_process	Glyma.01G130500, Glyma.01G192500, Glyma.01G219400, Glyma.02G008900, Glyma.02G052700, Glyma.02G135100, Glyma.02G233800, Glyma.09G057100, Glyma.09G277900, Glyma.09G284400, Glyma.09G284700, Glyma.10G009400, Glyma.10G191700, Glyma.11G162100, Glyma.13G307000, Glyma.14G201700, Glyma.16G055900, Glyma.17G036200, Glyma.17G052900, Glyma.17G061400, Glyma.18G055500, Glyma.20G214200
1VS6	Up	GO:0003700	4.01791e-08	1.88741e-05	47	840	transcription factor activity, sequence-specific DNA binding	molecular_function	Glyma.01G020500, Glyma.01G022500, Glyma.01G195900, Glyma.01G232000, Glyma.03G111700, Glyma.03G128200, Glyma.03G135800, Glyma.03G142400, Glyma.03G157300, Glyma.03G162500, Glyma.04G057700, Glyma.04G173500, Glyma.04G201900, Glyma.04G217400, Glyma.04G251400, Glyma.05G033400, Glyma.06G058400, Glyma.06G148400, Glyma.06G163700, Glyma.07G156200, Glyma.08G254400, Glyma.08G257300, Glyma.08G320200, Glyma.09…
1VS6	Up	GO:0015238	1.6339e-05	0.00520555	10	79	drug transmembrane transporter activity	molecular_function	Glyma.02G090100, Glyma.05G001700, Glyma.05G054100, Glyma.09G102800, Glyma.09G146800, Glyma.10G239000, Glyma.15G274600, Glyma.17G136400, Glyma.17G136500, Glyma.20G155500
1VS6	Up	GO:0006855	1.81499e-05	0.00520555	10	79	drug transmembrane transport	biological_process	Glyma.02G090100, Glyma.05G001700, Glyma.05G054100, Glyma.09G102800, Glyma.09G146800, Glyma.10G239000, Glyma.15G274600, Glyma.17G136400, Glyma.17G136500, Glyma.20G155500
1VS6	Up	GO:0015297	1.93927e-05	0.00520555	10	81	antiporter activity	molecular_function	Glyma.02G090100, Glyma.05G001700, Glyma.05G054100, Glyma.09G102800, Glyma.09G146800, Glyma.10G239000, Glyma.15G274600, Glyma.17G136400, Glyma.17G136500, Glyma.20G155500
1VS6	Up	GO:0016020	6.01778e-05	0.0141343	34	690	membrane	cellular_component	Glyma.02G090100, Glyma.03G168000, Glyma.03G168100, Glyma.03G175300, Glyma.03G222300, Glyma.03G264100, Glyma.04G055200, Glyma.04G211800, Glyma.04G250900, Glyma.05G001700, Glyma.05G054100, Glyma.09G102800, Glyma.09G146800, Glyma.10G239000, Glyma.12G191500, Glyma.13G004400, Glyma.13G081000, Glyma.13G238600, Glyma.13G338300, Glyma.13G355000, Glyma.14G148100, Glyma.14G148300, Glyma.15G036200, Glyma.15…
1VS6	Up	GO:0008171	0.00013653	0.0285044	6	33	O-methyltransferase activity	molecular_function	Glyma.09G094400, Glyma.10G176500, Glyma.10G215700, Glyma.11G256500, Glyma.18G269600, Glyma.20G176100
1VS6	Up	GO:0016491	0.000156314	0.0293713	33	699	oxidoreductase activity	molecular_function	Glyma.01G155400, Glyma.01G219400, Glyma.01G222700, Glyma.02G010100, Glyma.03G099000, Glyma.05G124800, Glyma.05G124900, Glyma.05G222400, Glyma.07G142600, Glyma.08G039300, Glyma.08G080900, Glyma.08G092800, Glyma.08G169700, Glyma.08G169900, Glyma.08G351800, Glyma.08G351900, Glyma.09G161600, Glyma.09G189200, Glyma.11G035300, Glyma.11G050400, Glyma.13G030400, Glyma.13G036200, Glyma.13G186200, Glyma.15…
1VS6	Up	GO:0016705	0.00186402	0.318409	16	293	oxidoreductase activity, acting on paired donors, with incorporation or reduction of molecular oxygen	molecular_function	Glyma.02G298800, Glyma.04G035000, Glyma.05G170400, Glyma.07G010700, Glyma.08G274500, Glyma.09G048700, Glyma.09G049200, Glyma.10G234700, Glyma.11G062500, Glyma.11G062700, Glyma.15G245300, Glyma.17G015400, Glyma.18G297200, Glyma.19G003600, Glyma.19G014600, Glyma.20G114200
1VS6	Up	GO:0005452	0.00290108	0.419318	3	13	inorganic anion exchanger activity	molecular_function	Glyma.03G222300, Glyma.17G088800, Glyma.19G219500
1VS6	Up	GO:0006820	0.00290108	0.419318	3	13	anion transport	biological_process	Glyma.03G222300, Glyma.17G088800, Glyma.19G219500
1VS6	Up	GO:0007275	0.00407937	0.54751	5	44	multicellular organismal development	biological_process	Glyma.01G022500, Glyma.01G195900, Glyma.09G199800, Glyma.11G045800, Glyma.17G158300
1VS6	Up	GO:0006952	0.00452074	0.563595	6	71	defense response	biological_process	Glyma.01G165200, Glyma.06G249800, Glyma.11G078000, Glyma.15G217100, Glyma.15G218900, XLOC_022011
1VS6	Up	GO:0042545	0.0047991	0.563595	5	50	cell wall modification	biological_process	Glyma.01G138000, Glyma.02G008400, Glyma.03G216000, Glyma.10G017200, Glyma.19G212500
1VS6	Up	GO:0006468	0.00547235	0.604855	23	520	protein phosphorylation	biological_process	Glyma.02G206300, Glyma.03G003300, Glyma.04G026700, Glyma.04G053100, Glyma.05G024000, Glyma.06G220200, Glyma.06G256400, Glyma.07G069000, Glyma.08G357200, Glyma.09G243600, Glyma.12G007300, Glyma.12G142400, Glyma.13G034500, Glyma.13G106500, Glyma.13G300000, Glyma.14G060300, Glyma.14G118800, Glyma.14G157600, Glyma.15G021800, Glyma.15G021900, Glyma.15G069500, Glyma.17G071700, Glyma.18G249700
1VS6	Up	GO:0005506	0.00792649	0.827437	16	347	iron ion binding	molecular_function	Glyma.02G298800, Glyma.04G035000, Glyma.05G170400, Glyma.07G010700, Glyma.08G274500, Glyma.09G048700, Glyma.09G049200, Glyma.10G234700, Glyma.11G062500, Glyma.11G062700, Glyma.15G245300, Glyma.17G015400, Glyma.18G297200, Glyma.19G003600, Glyma.19G014600, Glyma.20G114200
1VS6	Up	GO:0004867	0.00850361	0.840963	2	10	serine-type endopeptidase inhibitor activity	molecular_function	Glyma.18G231400, Glyma.20G205900
1VS6	Up	GO:0030599	0.0122481	1	5	63	pectinesterase activity	molecular_function	Glyma.01G138000, Glyma.02G008400, Glyma.03G216000, Glyma.10G017200, Glyma.19G212500
1VS6	Up	GO:0006351	0.0184949	1	8	142	transcription, DNA-templated	biological_process	Glyma.03G128200, Glyma.03G142400, Glyma.05G195200, Glyma.10G092100, Glyma.11G183700, Glyma.13G316900, Glyma.14G167000, Glyma.19G145300
1VS6	Up	GO:0004743	0.02078	1	3	23	pyruvate kinase activity	molecular_function	Glyma.10G201100, Glyma.19G190100, Glyma.20G136200
1VS6	Up	GO:0009349	0.0253065	1	1	1	riboflavin synthase complex	cellular_component	XLOC_010715
1VS6	Up	GO:0005618	0.0267689	1	7	128	cell wall	cellular_component	Glyma.01G138000, Glyma.02G008400, Glyma.03G216000, Glyma.10G017200, Glyma.17G064900, Glyma.19G106700, Glyma.19G212500
1VS6	Up	GO:0006270	0.0273891	1	2	11	DNA replication initiation	biological_process	Glyma.03G219200, XLOC_030410
1VS6	Up	GO:0050660	0.0293116	1	6	100	flavin adenine dinucleotide binding	molecular_function	Glyma.05G124800, Glyma.05G124900, Glyma.08G080900, Glyma.15G132600, Glyma.16G019900, Glyma.17G054600
1VS6	Up	GO:0022857	0.0386892	1	7	134	transmembrane transporter activity	molecular_function	Glyma.04G171800, Glyma.04G250900, Glyma.06G192100, Glyma.13G081000, Glyma.14G148100, Glyma.14G148300, Glyma.16G216500
1VS6	Up	GO:0042626	0.0400596	1	6	102	ATPase activity, coupled to transmembrane movement of substances	molecular_function	Glyma.10G227400, Glyma.13G119000, Glyma.16G078100, Glyma.18G263200, Glyma.19G016400, XLOC_035220
1VS6	Up	GO:0006096	0.0444764	1	3	32	glycolytic process	biological_process	Glyma.10G201100, Glyma.19G190100, Glyma.20G136200
1VS6	Up	GO:0004672	0.0452759	1	56	1827	protein kinase activity	molecular_function	Glyma.01G179000, Glyma.01G240800, Glyma.01G240900, Glyma.02G206300, Glyma.03G003300, Glyma.04G020100, Glyma.04G026700, Glyma.04G035100, Glyma.04G053100, Glyma.04G151200, Glyma.05G024000, Glyma.06G088700, Glyma.06G220200, Glyma.06G256400, Glyma.07G004600, Glyma.07G069000, Glyma.08G125800, Glyma.08G167300, Glyma.08G227200, Glyma.08G345500, Glyma.08G357200, Glyma.09G005500, Glyma.09G018800, Glyma.09…
1VS7	Down	GO:0015979	2.48256e-11	4.66474e-08	13	87	photosynthesis	biological_process	Glyma.04G014500, Glyma.04G112800, Glyma.05G172300, Glyma.09G073900, Glyma.09G087700, Glyma.09G090100, Glyma.10G290700, Glyma.15G174200, Glyma.15G194300, Glyma.18G046700, Glyma.19G126700, Glyma.U016600, XLOC_009133
1VS7	Down	GO:0009522	1.39756e-10	1.31301e-07	9	33	photosystem I	cellular_component	Glyma.04G112800, Glyma.07G019700, Glyma.08G204800, Glyma.09G087700, Glyma.09G090100, Glyma.13G129500, Glyma.15G194300, Glyma.U016600, XLOC_009133
1VS7	Down	GO:0009765	5.24942e-09	3.28789e-06	8	34	photosynthesis, light harvesting	biological_process	Glyma.06G194900, Glyma.08G074000, Glyma.12G219300, Glyma.13G282000, Glyma.14G003400, Glyma.15G179400, Glyma.16G145800, Glyma.20G212900
1VS7	Down	GO:0009523	8.94937e-08	4.20397e-05	9	66	photosystem II	cellular_component	Glyma.04G014500, Glyma.05G172300, Glyma.09G073900, Glyma.10G290700, Glyma.15G174200, Glyma.18G046700, Glyma.19G126700, XLOC_019823, XLOC_034334
1VS7	Down	GO:0009772	6.59025e-06	0.00247662	4	11	photosynthetic electron transport in photosystem II	biological_process	Glyma.04G095000, Glyma.06G217900, XLOC_019823, XLOC_034334
1VS7	Down	GO:0008610	3.53485e-05	0.01107	5	35	lipid biosynthetic process	biological_process	Glyma.04G057800, Glyma.06G058500, Glyma.12G075100, Glyma.20G115500, Glyma.20G240900
1VS7	Down	GO:0006633	7.35771e-05	0.0197502	6	64	fatty acid biosynthetic process	biological_process	Glyma.04G057800, Glyma.06G058500, Glyma.12G075100, Glyma.17G069100, Glyma.20G115500, Glyma.20G240900
1VS7	Down	GO:0019684	0.000200772	0.0471563	3	10	photosynthesis, light reaction	biological_process	Glyma.04G095000, Glyma.06G217900, XLOC_026945
1VS7	Down	GO:0042132	0.000344843	0.0719956	3	12	fructose 1,6-bisphosphate 1-phosphatase activity	molecular_function	Glyma.07G142700, Glyma.10G225400, Glyma.18G193600
1VS7	Down	GO:0009535	0.000388005	0.0729062	4	29	chloroplast thylakoid membrane	cellular_component	XLOC_009133, XLOC_019823, XLOC_026945, XLOC_034334
1VS7	Down	GO:0009538	0.000452506	0.072933	3	13	photosystem I reaction center	cellular_component	Glyma.07G019700, Glyma.08G204800, Glyma.13G129500
1VS7	Down	GO:0016168	0.000465778	0.072933	3	13	chlorophyll binding	molecular_function	XLOC_009133, XLOC_019823, XLOC_034334
1VS7	Down	GO:0018298	0.000798149	0.115363	3	18	protein-chromophore linkage	biological_process	XLOC_009133, XLOC_019823, XLOC_034334
1VS7	Down	GO:0016620	0.00126908	0.153066	3	20	oxidoreductase activity, acting on the aldehyde or oxo group of donors, NAD or NADP as acceptor	molecular_function	Glyma.04G015900, Glyma.06G015900, Glyma.19G106800
1VS7	Down	GO:0009579	0.00128898	0.153066	2	5	thylakoid	cellular_component	Glyma.09G090100, Glyma.U016600
1VS7	Down	GO:0009654	0.00130339	0.153066	4	40	photosystem II oxygen evolving complex	cellular_component	Glyma.04G014500, Glyma.10G290700, Glyma.18G046700, Glyma.19G126700
1VS7	Down	GO:0010207	0.00142777	0.157811	2	5	photosystem II assembly	biological_process	Glyma.12G200200, Glyma.13G302100
1VS7	Down	GO:0006468	0.00170548	0.178033	12	520	protein phosphorylation	biological_process	Glyma.03G027200, Glyma.04G139100, Glyma.04G244000, Glyma.06G257500, Glyma.08G061000, Glyma.08G307400, Glyma.12G140200, Glyma.15G021300, Glyma.15G227000, Glyma.16G027200, Glyma.16G065700, Glyma.U024800
1VS7	Down	GO:0045156	0.0021474	0.212367	2	6	electron transporter, transferring electrons within the cyclic electron transport pathway of photosynthesis activity	molecular_function	XLOC_019823, XLOC_034334
1VS7	Down	GO:0005509	0.00385146	0.361845	5	92	calcium ion binding	molecular_function	Glyma.04G014500, Glyma.10G290700, Glyma.17G242400, Glyma.18G046700, Glyma.19G126700
1VS7	Down	GO:0045017	0.0121944	1	1	1	glycerolipid biosynthetic process	biological_process	Glyma.12G114900
1VS7	Down	GO:0005506	0.0167571	1	9	347	iron ion binding	molecular_function	Glyma.02G119600, Glyma.05G021900, Glyma.05G042500, Glyma.14G117200, Glyma.17G069100, Glyma.20G007200, Glyma.20G018600, Glyma.20G188000, XLOC_034334
1VS7	Down	GO:0004672	0.0216652	1	26	1827	protein kinase activity	molecular_function	Glyma.01G013500, Glyma.03G027200, Glyma.04G139100, Glyma.04G244000, Glyma.06G257500, Glyma.07G154100, Glyma.07G270800, Glyma.08G061000, Glyma.08G307400, Glyma.09G014900, Glyma.10G254300, Glyma.11G036600, Glyma.11G204500, Glyma.11G230400, Glyma.12G140200, Glyma.13G053800, Glyma.15G021300, Glyma.15G226500, Glyma.15G227000, Glyma.16G027200, Glyma.16G059700, Glyma.16G065700, Glyma.17G262300, Glyma.20…
1VS7	Down	GO:0009507	0.0221254	1	4	90	chloroplast	cellular_component	Glyma.12G178800, Glyma.19G251000, XLOC_009133, XLOC_014132
1VS7	Down	GO:0046422	0.0222244	1	1	2	violaxanthin de-epoxidase activity	molecular_function	Glyma.19G251000
1VS7	Down	GO:0008360	0.0242342	1	1	2	regulation of cell shape	biological_process	XLOC_029769
1VS7	Down	GO:0009635	0.0242416	1	1	2	response to herbicide	biological_process	XLOC_034334
1VS7	Down	GO:0010242	0.0242416	1	1	2	oxygen evolving activity	molecular_function	XLOC_034334
1VS7	Down	GO:0004970	0.0263246	1	2	31	ionotropic glutamate receptor activity	molecular_function	Glyma.13G233400, Glyma.14G001100
1VS7	Down	GO:0048544	0.0296645	1	2	30	recognition of pollen	biological_process	Glyma.04G139100, Glyma.08G061000
1VS7	Down	GO:0008152	0.0301012	1	12	583	metabolic process	biological_process	Glyma.03G014300, Glyma.03G221100, Glyma.04G243000, Glyma.06G247100, Glyma.10G281400, Glyma.11G245700, Glyma.12G009200, Glyma.12G122700, Glyma.13G289100, Glyma.17G176200, Glyma.19G079000, Glyma.20G107800
1VS7	Down	GO:0034599	0.036134	1	1	3	cellular response to oxidative stress	biological_process	Glyma.12G178800
1VS7	Down	GO:0071486	0.036134	1	1	3	cellular response to high light intensity	biological_process	Glyma.12G178800
1VS7	Down	GO:0004451	0.0425903	1	1	4	isocitrate lyase activity	molecular_function	Glyma.12G100500
1VS7	Down	GO:0016705	0.0466255	1	7	293	oxidoreductase activity, acting on paired donors, with incorporation or reduction of molecular oxygen	molecular_function	Glyma.02G119600, Glyma.05G021900, Glyma.05G042500, Glyma.14G117200, Glyma.20G007200, Glyma.20G018600, Glyma.20G188000
1VS7	Down	GO:0008839	0.0477756	1	1	4	4-hydroxy-tetrahydrodipicolinate reductase	molecular_function	Glyma.10G238800
1VS7	Down	GO:0009089	0.0477756	1	1	4	lysine biosynthetic process via diaminopimelate	biological_process	Glyma.10G238800
1VS7	Up	GO:0003700	3.06188e-12	5.75328e-09	56	840	transcription factor activity, sequence-specific DNA binding	molecular_function	Glyma.01G020500, Glyma.01G022500, Glyma.01G195900, Glyma.01G232000, Glyma.02G073900, Glyma.03G002300, Glyma.03G111700, Glyma.03G128200, Glyma.03G135800, Glyma.03G142400, Glyma.03G157300, Glyma.03G162500, Glyma.03G177500, Glyma.04G057700, Glyma.04G173500, Glyma.04G201900, Glyma.04G217400, Glyma.04G218400, Glyma.05G033400, Glyma.05G105600, Glyma.06G125100, Glyma.06G148400, Glyma.06G163700, Glyma.07…
1VS7	Up	GO:0020037	3.73914e-08	3.51292e-05	32	455	heme binding	molecular_function	Glyma.01G130500, Glyma.01G179600, Glyma.02G008900, Glyma.02G052700, Glyma.02G233800, Glyma.03G007700, Glyma.04G035000, Glyma.05G019200, Glyma.07G010700, Glyma.07G212800, Glyma.09G048700, Glyma.09G049200, Glyma.09G057100, Glyma.09G277900, Glyma.09G279100, Glyma.09G284700, Glyma.10G009400, Glyma.10G203500, Glyma.11G062500, Glyma.11G062700, Glyma.11G162100, Glyma.14G201700, Glyma.15G245300, Glyma.17…
1VS7	Up	GO:0004601	1.40352e-06	0.000879069	16	164	peroxidase activity	molecular_function	Glyma.01G130500, Glyma.01G222700, Glyma.02G008900, Glyma.02G052700, Glyma.02G233800, Glyma.03G007700, Glyma.07G130800, Glyma.09G057100, Glyma.09G277900, Glyma.09G284700, Glyma.10G009400, Glyma.11G162100, Glyma.14G201700, Glyma.17G052900, Glyma.17G061400, Glyma.18G055500
1VS7	Up	GO:0006979	1.55586e-05	0.00549896	15	178	response to oxidative stress	biological_process	Glyma.01G130500, Glyma.01G219400, Glyma.02G008900, Glyma.02G052700, Glyma.02G233800, Glyma.03G007700, Glyma.09G057100, Glyma.09G277900, Glyma.09G284700, Glyma.10G009400, Glyma.11G162100, Glyma.14G201700, Glyma.17G052900, Glyma.17G061400, Glyma.18G055500
1VS7	Up	GO:0015238	1.72672e-05	0.00549896	10	79	drug transmembrane transporter activity	molecular_function	Glyma.05G001700, Glyma.05G054100, Glyma.09G102800, Glyma.09G146800, Glyma.10G239000, Glyma.15G274600, Glyma.17G136400, Glyma.17G136500, Glyma.20G123400, Glyma.20G155500
1VS7	Up	GO:0006855	1.92022e-05	0.00549896	10	79	drug transmembrane transport	biological_process	Glyma.05G001700, Glyma.05G054100, Glyma.09G102800, Glyma.09G146800, Glyma.10G239000, Glyma.15G274600, Glyma.17G136400, Glyma.17G136500, Glyma.20G123400, Glyma.20G155500
1VS7	Up	GO:0015297	2.04858e-05	0.00549896	10	81	antiporter activity	molecular_function	Glyma.05G001700, Glyma.05G054100, Glyma.09G102800, Glyma.09G146800, Glyma.10G239000, Glyma.15G274600, Glyma.17G136400, Glyma.17G136500, Glyma.20G123400, Glyma.20G155500
1VS7	Up	GO:0016020	2.95942e-05	0.00695094	35	690	membrane	cellular_component	Glyma.01G200100, Glyma.03G168000, Glyma.03G175300, Glyma.03G222300, Glyma.04G055200, Glyma.04G250900, Glyma.05G001700, Glyma.05G054100, Glyma.05G210400, Glyma.06G111900, Glyma.06G112100, Glyma.08G290600, Glyma.09G102800, Glyma.09G146800, Glyma.10G239000, Glyma.12G191500, Glyma.13G004400, Glyma.13G081000, Glyma.13G227100, Glyma.13G238600, Glyma.13G338300, Glyma.14G148100, Glyma.14G148300, Glyma.15…
1VS7	Up	GO:0007275	8.46596e-05	0.017675	7	44	multicellular organismal development	biological_process	Glyma.01G022500, Glyma.01G195900, Glyma.03G177500, Glyma.09G199800, Glyma.11G045800, Glyma.14G089200, Glyma.17G158300
1VS7	Up	GO:0008171	0.00013904	0.0261256	6	33	O-methyltransferase activity	molecular_function	Glyma.04G227700, Glyma.09G094600, Glyma.10G176500, Glyma.10G215700, Glyma.11G256500, Glyma.20G176100
1VS7	Up	GO:0016705	0.000745567	0.1201	17	293	oxidoreductase activity, acting on paired donors, with incorporation or reduction of molecular oxygen	molecular_function	Glyma.01G179600, Glyma.04G035000, Glyma.05G019200, Glyma.07G010700, Glyma.09G048700, Glyma.09G049200, Glyma.09G279100, Glyma.10G203500, Glyma.11G062500, Glyma.11G062700, Glyma.15G245300, Glyma.17G015400, Glyma.17G080500, Glyma.18G297200, Glyma.20G114200, Glyma.20G147900, Glyma.U000100
1VS7	Up	GO:0016491	0.000767002	0.1201	31	699	oxidoreductase activity	molecular_function	Glyma.01G155400, Glyma.01G219400, Glyma.01G222700, Glyma.03G099000, Glyma.04G019500, Glyma.04G121700, Glyma.05G124800, Glyma.05G222400, Glyma.07G130800, Glyma.07G150900, Glyma.07G212800, Glyma.08G039300, Glyma.08G080900, Glyma.08G092800, Glyma.08G169700, Glyma.08G351800, Glyma.08G351900, Glyma.11G035300, Glyma.13G030400, Glyma.13G036200, Glyma.13G186200, Glyma.15G112700, Glyma.16G153400, Glyma.17…
1VS7	Up	GO:0005452	0.00296029	0.397313	3	13	inorganic anion exchanger activity	molecular_function	Glyma.03G222300, Glyma.17G088800, Glyma.19G219500
1VS7	Up	GO:0006820	0.00296029	0.397313	3	13	anion transport	biological_process	Glyma.03G222300, Glyma.17G088800, Glyma.19G219500
1VS7	Up	GO:0005506	0.00364485	0.456578	17	347	iron ion binding	molecular_function	Glyma.01G179600, Glyma.04G035000, Glyma.05G019200, Glyma.07G010700, Glyma.09G048700, Glyma.09G049200, Glyma.09G279100, Glyma.10G203500, Glyma.11G062500, Glyma.11G062700, Glyma.15G245300, Glyma.17G015400, Glyma.17G080500, Glyma.18G297200, Glyma.20G114200, Glyma.20G147900, Glyma.U000100
1VS7	Up	GO:0004375	0.00416749	0.48942	2	4	glycine dehydrogenase (decarboxylating) activity	molecular_function	Glyma.04G051200, Glyma.06G052100
1VS7	Up	GO:0006952	0.00453924	0.50172	6	71	defense response	biological_process	Glyma.06G249800, Glyma.11G078000, Glyma.15G145900, Glyma.15G218900, Glyma.15G274200, XLOC_024782
1VS7	Up	GO:0006546	0.00682157	0.712096	2	5	glycine catabolic process	biological_process	Glyma.04G051200, Glyma.06G052100
1VS7	Up	GO:0006355	0.00857326	0.84785	28	705	regulation of transcription, DNA-templated	biological_process	Glyma.02G073900, Glyma.03G002300, Glyma.03G128200, Glyma.03G135800, Glyma.03G142400, Glyma.03G157300, Glyma.04G173500, Glyma.04G218400, Glyma.07G218000, Glyma.08G254400, Glyma.08G320200, Glyma.09G029800, Glyma.09G240000, Glyma.10G092100, Glyma.11G183700, Glyma.12G005000, Glyma.13G316900, Glyma.14G071400, Glyma.14G083700, Glyma.14G085500, Glyma.14G167000, Glyma.16G042300, Glyma.18G052500, Glyma.18…
1VS7	Up	GO:0008061	0.0100204	0.941416	1	1	chitin binding	molecular_function	XLOC_024782
1VS7	Up	GO:0042626	0.0135428	1	7	102	ATPase activity, coupled to transmembrane movement of substances	molecular_function	Glyma.01G008200, Glyma.10G137600, Glyma.10G227400, Glyma.13G119000, Glyma.16G078100, Glyma.18G263200, Glyma.19G016400
1VS7	Up	GO:0022857	0.0140574	1	8	134	transmembrane transporter activity	molecular_function	Glyma.04G250900, Glyma.06G111900, Glyma.06G112100, Glyma.06G192100, Glyma.13G081000, Glyma.13G227100, Glyma.14G148100, Glyma.14G148300
1VS7	Up	GO:0004650	0.0140829	1	3	25	polygalacturonase activity	molecular_function	Glyma.02G009300, Glyma.09G224800, Glyma.15G275400
1VS7	Up	GO:0008083	0.0147972	1	2	11	growth factor activity	molecular_function	Glyma.01G195700, Glyma.10G255800
1VS7	Up	GO:0030001	0.0181449	1	8	148	metal ion transport	biological_process	Glyma.10G264100, Glyma.13G004400, Glyma.13G208400, Glyma.13G338300, Glyma.15G036200, Glyma.15G104400, Glyma.17G141000, Glyma.20G114400
1VS7	Up	GO:0004743	0.0213004	1	3	23	pyruvate kinase activity	molecular_function	Glyma.10G201100, Glyma.19G190100, Glyma.20G136200
1VS7	Up	GO:0006810	0.0231273	1	16	380	transport	biological_process	Glyma.01G008200, Glyma.01G200100, Glyma.07G023600, Glyma.08G218200, Glyma.08G290600, Glyma.10G005400, Glyma.10G137600, Glyma.10G221100, Glyma.10G227400, Glyma.13G119000, Glyma.16G078100, Glyma.16G155100, Glyma.17G148600, Glyma.18G263200, Glyma.19G016400, Glyma.20G170400
1VS7	Up	GO:0055085	0.0233263	1	7	111	transmembrane transport	biological_process	Glyma.01G008200, Glyma.10G137600, Glyma.13G119000, Glyma.16G078100, Glyma.18G169000, Glyma.19G016400, Glyma.19G159000
1VS7	Up	GO:0009349	0.0252909	1	1	1	riboflavin synthase complex	cellular_component	XLOC_010715
1VS7	Up	GO:0005618	0.0271396	1	7	128	cell wall	cellular_component	Glyma.02G086900, Glyma.03G216000, Glyma.10G017200, Glyma.17G059800, Glyma.17G064900, Glyma.19G106700, Glyma.19G212500
1VS7	Up	GO:0006096	0.0452456	1	3	32	glycolytic process	biological_process	Glyma.10G201100, Glyma.19G190100, Glyma.20G136200
1VS7	Up	GO:0003824	0.0476673	1	15	379	catalytic activity	molecular_function	Glyma.01G172900, Glyma.01G232400, Glyma.04G103600, Glyma.05G151200, Glyma.09G029900, Glyma.09G269400, Glyma.09G269500, Glyma.11G091600, Glyma.12G019800, Glyma.12G234200, Glyma.13G369800, Glyma.13G372000, Glyma.14G171700, Glyma.19G218300, XLOC_037011
1VS7	Up	GO:0030599	0.0499549	1	4	63	pectinesterase activity	molecular_function	Glyma.02G086900, Glyma.03G216000, Glyma.10G017200, Glyma.19G212500
1VS8	Down	GO:0009522	1.2065e-08	2.18241e-05	8	33	photosystem I	cellular_component	Glyma.08G204800, Glyma.09G087700, Glyma.09G090100, Glyma.13G129500, Glyma.13G357300, Glyma.15G003800, Glyma.15G194300, Glyma.U016600
1VS8	Down	GO:0015979	2.32295e-08	2.18241e-05	11	87	photosynthesis	biological_process	Glyma.02G061100, Glyma.04G014500, Glyma.09G073900, Glyma.09G087700, Glyma.09G090100, Glyma.10G290700, Glyma.15G194300, Glyma.15G253700, Glyma.18G046700, Glyma.19G126700, Glyma.U016600
1VS8	Down	GO:0009523	2.75184e-07	0.000153652	9	66	photosystem II	cellular_component	Glyma.02G061100, Glyma.04G014500, Glyma.09G073900, Glyma.10G290700, Glyma.15G253700, Glyma.18G046700, Glyma.19G126700, XLOC_019823, XLOC_034334
1VS8	Down	GO:0009765	3.27092e-07	0.000153652	7	34	photosynthesis, light harvesting	biological_process	Glyma.07G047600, Glyma.08G074000, Glyma.12G219300, Glyma.13G282000, Glyma.15G179400, Glyma.16G145800, Glyma.20G212900
1VS8	Down	GO:0006633	1.41314e-06	0.000531057	8	64	fatty acid biosynthetic process	biological_process	Glyma.04G057800, Glyma.06G058500, Glyma.06G118500, Glyma.10G274400, Glyma.12G075100, Glyma.17G069100, Glyma.20G115500, Glyma.20G240900
1VS8	Down	GO:0008610	4.23932e-06	0.00132761	6	35	lipid biosynthetic process	biological_process	Glyma.04G057800, Glyma.06G058500, Glyma.10G274400, Glyma.12G075100, Glyma.20G115500, Glyma.20G240900
1VS8	Down	GO:0009654	1.58416e-05	0.00425235	6	40	photosystem II oxygen evolving complex	cellular_component	Glyma.02G061100, Glyma.04G014500, Glyma.10G290700, Glyma.15G253700, Glyma.18G046700, Glyma.19G126700
1VS8	Down	GO:0009772	0.000401314	0.0942587	3	11	photosynthetic electron transport in photosystem II	biological_process	Glyma.04G095000, XLOC_019823, XLOC_034334
1VS8	Down	GO:0009538	0.000663829	0.138593	3	13	photosystem I reaction center	cellular_component	Glyma.08G204800, Glyma.13G129500, Glyma.13G357300
1VS8	Down	GO:0005509	0.00123353	0.23178	6	92	calcium ion binding	molecular_function	Glyma.02G061100, Glyma.04G014500, Glyma.10G290700, Glyma.18G046700, Glyma.19G126700, XLOC_005097
1VS8	Down	GO:0009579	0.0016867	0.271486	2	5	thylakoid	cellular_component	Glyma.09G090100, Glyma.U016600
1VS8	Down	GO:0010207	0.00184971	0.271486	2	5	photosystem II assembly	biological_process	Glyma.12G200200, Glyma.13G302100
1VS8	Down	GO:0016620	0.0018783	0.271486	3	20	oxidoreductase activity, acting on the aldehyde or oxo group of donors, NAD or NADP as acceptor	molecular_function	Glyma.04G015900, Glyma.16G044900, Glyma.19G106800
1VS8	Down	GO:0045156	0.00277649	0.372644	2	6	electron transporter, transferring electrons within the cyclic electron transport pathway of photosynthesis activity	molecular_function	XLOC_019823, XLOC_034334
1VS8	Down	GO:0005506	0.00548375	0.686931	11	347	iron ion binding	molecular_function	Glyma.02G119600, Glyma.03G030900, Glyma.05G021900, Glyma.05G042500, Glyma.13G120500, Glyma.14G117200, Glyma.17G069100, Glyma.19G015000, Glyma.20G007200, Glyma.20G018600, XLOC_034334
1VS8	Down	GO:0006468	0.00626591	0.735853	12	520	protein phosphorylation	biological_process	Glyma.04G139100, Glyma.04G244000, Glyma.06G257500, Glyma.08G061000, Glyma.08G066000, Glyma.12G140200, Glyma.13G032600, Glyma.15G021300, Glyma.15G227000, Glyma.16G065700, Glyma.17G214100, Glyma.U024800
1VS8	Down	GO:0009535	0.00725395	0.801775	3	29	chloroplast thylakoid membrane	cellular_component	XLOC_019823, XLOC_026945, XLOC_034334
1VS8	Down	GO:0019684	0.00802977	0.838219	2	10	photosynthesis, light reaction	biological_process	Glyma.04G095000, XLOC_026945
1VS8	Down	GO:0016020	0.00925952	0.900033	16	690	membrane	cellular_component	Glyma.02G188300, Glyma.03G005300, Glyma.04G057800, Glyma.04G240000, Glyma.06G058500, Glyma.06G118500, Glyma.08G050500, Glyma.08G070800, Glyma.10G086800, Glyma.10G274400, Glyma.11G169900, Glyma.12G075100, Glyma.12G133700, Glyma.19G202200, Glyma.20G115500, Glyma.20G240900
1VS8	Down	GO:0003825	0.0124309	0.900033	1	1	alpha,alpha-trehalose-phosphate synthase (UDP-forming) activity	molecular_function	XLOC_038060
1VS8	Down	GO:0006090	0.0126711	0.900033	1	2	pyruvate metabolic process	biological_process	Glyma.07G253700
1VS8	Down	GO:0050242	0.0126711	0.900033	1	2	pyruvate, phosphate dikinase activity	molecular_function	Glyma.07G253700
1VS8	Down	GO:0000160	0.0128216	0.900033	3	51	phosphorelay signal transduction system	biological_process	Glyma.07G015600, Glyma.08G201100, Glyma.15G019500
1VS8	Down	GO:0004332	0.0129804	0.900033	2	13	fructose-bisphosphate aldolase activity	molecular_function	Glyma.04G008300, Glyma.11G111400
1VS8	Down	GO:0016705	0.0135153	0.900033	9	293	oxidoreductase activity, acting on paired donors, with incorporation or reduction of molecular oxygen	molecular_function	Glyma.02G119600, Glyma.03G030900, Glyma.05G021900, Glyma.05G042500, Glyma.13G120500, Glyma.14G117200, Glyma.19G015000, Glyma.20G007200, Glyma.20G018600
1VS8	Down	GO:0016168	0.0135426	0.900033	2	13	chlorophyll binding	molecular_function	XLOC_019823, XLOC_034334
1VS8	Down	GO:0008757	0.0137286	0.900033	1	1	S-adenosylmethionine-dependent methyltransferase activity	molecular_function	XLOC_025578
1VS8	Down	GO:0010289	0.0137286	0.900033	1	1	homogalacturonan biosynthetic process	biological_process	XLOC_025578
1VS8	Down	GO:0045017	0.0138909	0.900033	1	1	glycerolipid biosynthetic process	biological_process	Glyma.12G114900
1VS8	Down	GO:0016310	0.0174928	1	1	3	phosphorylation	biological_process	Glyma.07G253700
1VS8	Down	GO:0018298	0.019198	1	2	18	protein-chromophore linkage	biological_process	XLOC_019823, XLOC_034334
1VS8	Down	GO:0004683	0.02028	1	1	3	calmodulin-dependent protein kinase activity	molecular_function	XLOC_005097
1VS8	Down	GO:0009738	0.02028	1	1	3	abscisic acid-activated signaling pathway	biological_process	XLOC_005097
1VS8	Down	GO:0009931	0.02028	1	1	3	calcium-dependent protein serine/threonine kinase activity	molecular_function	XLOC_005097
1VS8	Down	GO:0018105	0.02028	1	1	3	peptidyl-serine phosphorylation	biological_process	XLOC_005097
1VS8	Down	GO:0071949	0.0208744	1	1	2	FAD binding	molecular_function	Glyma.17G174500
1VS8	Down	GO:0005992	0.0257143	1	1	2	trehalose biosynthetic process	biological_process	XLOC_038060
1VS8	Down	GO:0009635	0.0275928	1	1	2	response to herbicide	biological_process	XLOC_034334
1VS8	Down	GO:0010242	0.0275928	1	1	2	oxygen evolving activity	molecular_function	XLOC_034334
1VS8	Down	GO:0048544	0.0396123	1	2	30	recognition of pollen	biological_process	Glyma.04G139100, Glyma.08G061000
1VS8	Down	GO:0004553	0.0403523	1	9	365	hydrolase activity, hydrolyzing O-glycosyl compounds	molecular_function	Glyma.03G132700, Glyma.03G226000, Glyma.04G200900, Glyma.12G021300, Glyma.13G278600, Glyma.15G031400, Glyma.18G165700, Glyma.19G134700, Glyma.19G223000
1VS8	Down	GO:0005802	0.0408064	1	1	3	trans-Golgi network	cellular_component	XLOC_025578
1VS8	Down	GO:0048367	0.0409395	1	1	3	shoot system development	biological_process	XLOC_025578
1VS8	Down	GO:0034599	0.0410917	1	1	3	cellular response to oxidative stress	biological_process	Glyma.12G178800
1VS8	Down	GO:0071486	0.0410917	1	1	3	cellular response to high light intensity	biological_process	Glyma.12G178800
1VS8	Down	GO:0006508	0.0432079	1	6	211	proteolysis	biological_process	Glyma.03G199100, Glyma.06G272800, Glyma.07G205400, Glyma.12G179600, Glyma.19G045800, Glyma.19G196700
1VS8	Down	GO:0004672	0.0436796	1	28	1827	protein kinase activity	molecular_function	Glyma.01G013500, Glyma.01G206500, Glyma.02G100000, Glyma.04G139100, Glyma.04G244000, Glyma.06G257500, Glyma.07G270800, Glyma.08G061000, Glyma.08G066000, Glyma.08G249200, Glyma.10G254300, Glyma.11G036600, Glyma.11G204500, Glyma.11G230500, Glyma.12G140200, Glyma.13G032600, Glyma.13G053800, Glyma.15G021300, Glyma.15G226500, Glyma.15G227000, Glyma.16G065700, Glyma.17G214100, Glyma.17G262300, Glyma.20…
1VS8	Up	GO:0020037	2.02785e-10	3.81033e-07	37	455	heme binding	molecular_function	Glyma.01G130500, Glyma.01G179600, Glyma.02G008900, Glyma.02G052700, Glyma.02G135100, Glyma.02G135200, Glyma.02G233800, Glyma.02G298800, Glyma.04G035000, Glyma.05G019200, Glyma.06G221700, Glyma.07G010700, Glyma.07G212800, Glyma.08G274500, Glyma.09G057100, Glyma.09G160900, Glyma.09G277900, Glyma.09G279100, Glyma.09G284700, Glyma.11G062700, Glyma.11G162100, Glyma.13G306900, Glyma.13G307000, Glyma.14…
1VS8	Up	GO:0004601	4.42857e-10	4.16065e-07	21	164	peroxidase activity	molecular_function	Glyma.01G130500, Glyma.02G008900, Glyma.02G052700, Glyma.02G135100, Glyma.02G135200, Glyma.02G233800, Glyma.06G221700, Glyma.07G130800, Glyma.09G057100, Glyma.09G277900, Glyma.09G284700, Glyma.11G162100, Glyma.13G306900, Glyma.13G307000, Glyma.14G201700, Glyma.16G055900, Glyma.16G132800, Glyma.17G052900, Glyma.17G061400, Glyma.18G055500, Glyma.20G214200
1VS8	Up	GO:0006979	1.36415e-09	8.54411e-07	21	178	response to oxidative stress	biological_process	Glyma.01G130500, Glyma.01G219400, Glyma.02G008900, Glyma.02G052700, Glyma.02G135100, Glyma.02G135200, Glyma.02G233800, Glyma.06G221700, Glyma.09G057100, Glyma.09G277900, Glyma.09G284700, Glyma.11G162100, Glyma.13G306900, Glyma.13G307000, Glyma.14G201700, Glyma.16G055900, Glyma.16G132800, Glyma.17G052900, Glyma.17G061400, Glyma.18G055500, Glyma.20G214200
1VS8	Up	GO:0003700	1.34853e-08	6.33472e-06	50	840	transcription factor activity, sequence-specific DNA binding	molecular_function	Glyma.01G022500, Glyma.01G232000, Glyma.03G002300, Glyma.03G111700, Glyma.03G128200, Glyma.03G135800, Glyma.03G142400, Glyma.03G157300, Glyma.03G177500, Glyma.04G057700, Glyma.04G173500, Glyma.04G201900, Glyma.04G217400, Glyma.04G251400, Glyma.05G033400, Glyma.05G105600, Glyma.06G058400, Glyma.06G125100, Glyma.06G148400, Glyma.06G163700, Glyma.07G017300, Glyma.08G254400, Glyma.08G257300, Glyma.08…
1VS8	Up	GO:0015238	5.15001e-06	0.00166961	11	79	drug transmembrane transporter activity	molecular_function	Glyma.05G001700, Glyma.05G049700, Glyma.05G054100, Glyma.09G102800, Glyma.09G146800, Glyma.10G239000, Glyma.15G274600, Glyma.17G131700, Glyma.17G136400, Glyma.17G136500, Glyma.20G155500
1VS8	Up	GO:0006855	5.84535e-06	0.00166961	11	79	drug transmembrane transport	biological_process	Glyma.05G001700, Glyma.05G049700, Glyma.05G054100, Glyma.09G102800, Glyma.09G146800, Glyma.10G239000, Glyma.15G274600, Glyma.17G131700, Glyma.17G136400, Glyma.17G136500, Glyma.20G155500
1VS8	Up	GO:0015297	6.21993e-06	0.00166961	11	81	antiporter activity	molecular_function	Glyma.05G001700, Glyma.05G049700, Glyma.05G054100, Glyma.09G102800, Glyma.09G146800, Glyma.10G239000, Glyma.15G274600, Glyma.17G131700, Glyma.17G136400, Glyma.17G136500, Glyma.20G155500
1VS8	Up	GO:0016020	1.146e-05	0.00269167	38	690	membrane	cellular_component	Glyma.01G200100, Glyma.03G168000, Glyma.03G168100, Glyma.03G175300, Glyma.03G222300, Glyma.04G055200, Glyma.04G250900, Glyma.05G001700, Glyma.05G049700, Glyma.05G054100, Glyma.05G210400, Glyma.06G111900, Glyma.06G112100, Glyma.08G290600, Glyma.09G102800, Glyma.09G146800, Glyma.10G239000, Glyma.11G042000, Glyma.12G191500, Glyma.13G004400, Glyma.13G081000, Glyma.13G081100, Glyma.13G238600, Glyma.13…
1VS8	Up	GO:0016491	0.0010262	0.214248	32	699	oxidoreductase activity	molecular_function	Glyma.01G155400, Glyma.01G219400, Glyma.02G010100, Glyma.03G099000, Glyma.04G121700, Glyma.05G124800, Glyma.05G222400, Glyma.07G130800, Glyma.07G142600, Glyma.07G150900, Glyma.07G212800, Glyma.08G039300, Glyma.08G080900, Glyma.08G092800, Glyma.08G169700, Glyma.08G169900, Glyma.08G351800, Glyma.08G351900, Glyma.11G035300, Glyma.13G030400, Glyma.13G036200, Glyma.13G186200, Glyma.15G112700, Glyma.15…
1VS8	Up	GO:0005452	0.00369793	0.609135	3	13	inorganic anion exchanger activity	molecular_function	Glyma.03G222300, Glyma.17G088800, Glyma.19G219500
1VS8	Up	GO:0006820	0.00369793	0.609135	3	13	anion transport	biological_process	Glyma.03G222300, Glyma.17G088800, Glyma.19G219500
1VS8	Up	GO:0016705	0.00389016	0.609135	16	293	oxidoreductase activity, acting on paired donors, with incorporation or reduction of molecular oxygen	molecular_function	Glyma.01G179600, Glyma.02G298800, Glyma.04G035000, Glyma.05G019200, Glyma.07G010700, Glyma.08G274500, Glyma.09G160900, Glyma.09G279100, Glyma.11G062700, Glyma.15G245300, Glyma.16G210300, Glyma.17G015400, Glyma.18G297200, Glyma.20G114200, Glyma.20G147900, Glyma.U000100
1VS8	Up	GO:0006810	0.00525662	0.759784	19	380	transport	biological_process	Glyma.01G008200, Glyma.01G041400, Glyma.01G200100, Glyma.07G023600, Glyma.08G218200, Glyma.08G290600, Glyma.10G005400, Glyma.10G221100, Glyma.10G227400, Glyma.11G042000, Glyma.11G224100, Glyma.13G119000, Glyma.16G078100, Glyma.16G155100, Glyma.17G148600, Glyma.18G259500, Glyma.18G263200, Glyma.19G016400, Glyma.20G170400
1VS8	Up	GO:0022857	0.00636716	0.854564	9	134	transmembrane transporter activity	molecular_function	Glyma.04G250900, Glyma.06G111900, Glyma.06G112100, Glyma.06G192100, Glyma.13G081000, Glyma.13G081100, Glyma.14G148100, Glyma.14G148300, Glyma.16G216500
1VS8	Up	GO:0008171	0.0102567	1	4	33	O-methyltransferase activity	molecular_function	Glyma.10G176500, Glyma.10G215700, Glyma.11G256500, Glyma.20G176100
1VS8	Up	GO:0003824	0.0118731	1	18	379	catalytic activity	molecular_function	Glyma.01G103100, Glyma.01G172900, Glyma.01G232400, Glyma.06G028800, Glyma.09G029900, Glyma.09G269400, Glyma.11G091600, Glyma.11G239300, Glyma.12G019800, Glyma.12G226400, Glyma.12G234200, Glyma.13G285700, Glyma.13G369800, Glyma.13G372000, Glyma.14G171700, Glyma.19G218300, XLOC_041702, XLOC_045925
1VS8	Up	GO:0006873	0.0140221	1	2	8	cellular ion homeostasis	biological_process	Glyma.04G027300, Glyma.10G229300
1VS8	Up	GO:0008308	0.0140221	1	2	8	voltage-gated anion channel activity	molecular_function	Glyma.04G027300, Glyma.10G229300
1VS8	Up	GO:0005506	0.0145056	1	16	347	iron ion binding	molecular_function	Glyma.01G179600, Glyma.02G298800, Glyma.04G035000, Glyma.05G019200, Glyma.07G010700, Glyma.08G274500, Glyma.09G160900, Glyma.09G279100, Glyma.11G062700, Glyma.15G245300, Glyma.16G210300, Glyma.17G015400, Glyma.18G297200, Glyma.20G114200, Glyma.20G147900, Glyma.U000100
1VS8	Up	GO:0004650	0.0160633	1	3	25	polygalacturonase activity	molecular_function	Glyma.02G009300, Glyma.09G224800, Glyma.15G275400
1VS8	Up	GO:0004659	0.0195831	1	3	22	prenyltransferase activity	molecular_function	Glyma.03G033100, Glyma.10G070300, Glyma.11G210500
1VS8	Up	GO:0005215	0.0234166	1	12	244	transporter activity	molecular_function	Glyma.01G041400, Glyma.01G200100, Glyma.07G023600, Glyma.08G218200, Glyma.08G290600, Glyma.10G005400, Glyma.10G221100, Glyma.11G042000, Glyma.11G224100, Glyma.16G155100, Glyma.18G259500, Glyma.20G170400
1VS8	Up	GO:0009349	0.0258985	1	1	1	riboflavin synthase complex	cellular_component	XLOC_010715
1VS8	Up	GO:0007275	0.0263281	1	4	44	multicellular organismal development	biological_process	Glyma.01G022500, Glyma.03G177500, Glyma.09G199800, Glyma.11G045800
1VS8	Up	GO:0004743	0.0272256	1	3	23	pyruvate kinase activity	molecular_function	Glyma.10G201100, Glyma.19G190100, Glyma.20G136200
1VS8	Up	GO:0004805	0.0285632	1	1	1	trehalose-phosphatase activity	molecular_function	XLOC_045925
1VS8	Up	GO:0006468	0.0300569	1	22	520	protein phosphorylation	biological_process	Glyma.02G206300, Glyma.03G002700, Glyma.03G054900, Glyma.04G053100, Glyma.06G220200, Glyma.06G256400, Glyma.07G069000, Glyma.08G174500, Glyma.08G235800, Glyma.09G243600, Glyma.12G007300, Glyma.12G142300, Glyma.12G142400, Glyma.13G034500, Glyma.13G106500, Glyma.13G300000, Glyma.14G118800, Glyma.14G157600, Glyma.15G021800, Glyma.18G249700, Glyma.19G261700, Glyma.U025000
1VS8	Up	GO:0043531	0.0391162	1	8	152	ADP binding	molecular_function	Glyma.01G125400, Glyma.02G284100, Glyma.06G310000, Glyma.12G239700, Glyma.12G239800, Glyma.12G240100, Glyma.16G118600, Glyma.18G281700
1VS8	Up	GO:0009308	0.0466356	1	2	14	amine metabolic process	biological_process	Glyma.02G038500, Glyma.17G019300
1VS8	Up	GO:0003774	0.0478218	1	3	29	motor activity	molecular_function	Glyma.08G161500, Glyma.13G120800, Glyma.15G266300
1VS8	Up	GO:0016021	0.0481073	1	26	743	integral component of membrane	cellular_component	Glyma.01G008200, Glyma.01G200100, Glyma.04G014000, Glyma.04G027300, Glyma.04G102600, Glyma.06G192100, Glyma.09G122600, Glyma.09G134900, Glyma.10G006700, Glyma.10G227400, Glyma.10G229300, Glyma.11G042000, Glyma.11G195200, Glyma.13G119000, Glyma.13G213300, Glyma.13G323800, Glyma.14G101100, Glyma.16G078100, Glyma.16G115500, Glyma.16G180800, Glyma.16G216500, Glyma.18G141900, Glyma.18G263200, Glyma.19…
1VS9	Down	GO:0009535	2.24411e-09	4.21669e-06	7	29	chloroplast thylakoid membrane	cellular_component	XLOC_009133, XLOC_019823, XLOC_026945, XLOC_034214, XLOC_034334, XLOC_042521, XLOC_047675
1VS9	Down	GO:0009522	1.91624e-08	1.24088e-05	7	33	photosystem I	cellular_component	Glyma.08G204800, Glyma.09G087700, Glyma.09G090100, Glyma.13G357300, Glyma.15G126100, Glyma.U016600, XLOC_009133
1VS9	Down	GO:0015979	1.98118e-08	1.24088e-05	10	87	photosynthesis	biological_process	Glyma.08G154300, Glyma.09G073900, Glyma.09G087700, Glyma.09G090100, Glyma.10G290700, Glyma.15G174200, Glyma.18G046700, Glyma.19G126700, Glyma.U016600, XLOC_009133
1VS9	Down	GO:0009523	3.5746e-07	0.000167917	8	66	photosystem II	cellular_component	Glyma.08G154300, Glyma.09G073900, Glyma.10G290700, Glyma.15G174200, Glyma.18G046700, Glyma.19G126700, XLOC_019823, XLOC_034334
1VS9	Down	GO:0019684	6.82455e-07	0.000256467	4	10	photosynthesis, light reaction	biological_process	Glyma.04G095000, Glyma.06G217900, XLOC_026945, XLOC_042521
1VS9	Down	GO:0009772	1.08068e-06	0.000338432	4	11	photosynthetic electron transport in photosystem II	biological_process	Glyma.04G095000, Glyma.06G217900, XLOC_019823, XLOC_034334
1VS9	Down	GO:0008610	2.44291e-06	0.000655746	6	35	lipid biosynthetic process	biological_process	Glyma.02G001500, Glyma.06G012500, Glyma.06G058500, Glyma.12G075100, Glyma.20G115500, Glyma.20G240900
1VS9	Down	GO:0006633	6.55047e-06	0.00153854	7	64	fatty acid biosynthetic process	biological_process	Glyma.02G001500, Glyma.06G012500, Glyma.06G058500, Glyma.12G075100, Glyma.17G069100, Glyma.20G115500, Glyma.20G240900
1VS9	Down	GO:0009765	3.71788e-05	0.0077621	5	34	photosynthesis, light harvesting	biological_process	Glyma.07G047600, Glyma.12G219300, Glyma.13G282000, Glyma.15G179400, Glyma.20G212900
1VS9	Down	GO:0016168	0.000130902	0.0245965	3	13	chlorophyll binding	molecular_function	XLOC_009133, XLOC_019823, XLOC_034334
1VS9	Down	GO:0018298	0.000621196	0.106112	3	18	protein-chromophore linkage	biological_process	XLOC_009133, XLOC_019823, XLOC_034334
1VS9	Down	GO:0009579	0.000677929	0.106152	2	5	thylakoid	cellular_component	Glyma.09G090100, Glyma.U016600
1VS9	Down	GO:0045156	0.000756685	0.10937	2	6	electron transporter, transferring electrons within the cyclic electron transport pathway of photosynthesis activity	molecular_function	XLOC_019823, XLOC_034334
1VS9	Down	GO:0009654	0.000967473	0.129849	4	40	photosystem II oxygen evolving complex	cellular_component	Glyma.08G154300, Glyma.10G290700, Glyma.18G046700, Glyma.19G126700
1VS9	Down	GO:0010207	0.00126284	0.158191	2	5	photosystem II assembly	biological_process	Glyma.12G200200, Glyma.13G302100
1VS9	Down	GO:0048038	0.00177834	0.208844	3	26	quinone binding	molecular_function	XLOC_026945, XLOC_042521, XLOC_047675
1VS9	Down	GO:0005509	0.0035278	0.389926	5	92	calcium ion binding	molecular_function	Glyma.08G154300, Glyma.10G290700, Glyma.18G046700, Glyma.19G126700, XLOC_005097
1VS9	Down	GO:0016655	0.00415837	0.434087	2	10	oxidoreductase activity, acting on NAD(P)H, quinone or similar compound as acceptor	molecular_function	XLOC_026945, XLOC_042521
1VS9	Down	GO:0009408	0.00477183	0.471909	2	10	response to heat	biological_process	XLOC_001320, XLOC_004454
1VS9	Down	GO:0042132	0.00800741	0.701814	2	12	fructose 1,6-bisphosphate 1-phosphatase activity	molecular_function	Glyma.10G225400, Glyma.18G193600
1VS9	Down	GO:0009538	0.00829109	0.701814	2	13	photosystem I reaction center	cellular_component	Glyma.08G204800, Glyma.13G357300
1VS9	Down	GO:0005886	0.00830929	0.701814	4	77	plasma membrane	cellular_component	XLOC_005097, XLOC_026945, XLOC_034214, XLOC_042521
1VS9	Down	GO:0008289	0.0085906	0.701814	3	38	lipid binding	molecular_function	Glyma.03G016600, Glyma.12G194400, Glyma.13G308200
1VS9	Down	GO:0009507	0.00949406	0.743306	4	90	chloroplast	cellular_component	Glyma.12G178800, XLOC_009133, XLOC_014230, XLOC_047675
1VS9	Down	GO:0045017	0.0111884	0.763528	1	1	glycerolipid biosynthetic process	biological_process	Glyma.12G114900
1VS9	Down	GO:0046872	0.0115058	0.763528	6	173	metal ion binding	molecular_function	Glyma.12G178800, Glyma.20G054000, XLOC_009133, XLOC_019823, XLOC_028041, XLOC_030774
1VS9	Down	GO:0008757	0.0118789	0.763528	1	1	S-adenosylmethionine-dependent methyltransferase activity	molecular_function	XLOC_025578
1VS9	Down	GO:0010289	0.0118789	0.763528	1	1	homogalacturonan biosynthetic process	biological_process	XLOC_025578
1VS9	Down	GO:0003825	0.0119813	0.763528	1	1	alpha,alpha-trehalose-phosphate synthase (UDP-forming) activity	molecular_function	XLOC_038060
1VS9	Down	GO:0016020	0.0121904	0.763528	15	690	membrane	cellular_component	Glyma.01G058600, Glyma.02G001500, Glyma.04G240000, Glyma.06G012500, Glyma.06G058500, Glyma.10G086800, Glyma.11G169900, Glyma.12G075100, Glyma.12G133700, Glyma.16G209400, Glyma.16G218300, Glyma.19G202200, Glyma.20G115500, Glyma.20G187400, Glyma.20G240900
1VS9	Down	GO:0045263	0.0135385	0.820609	1	2	proton-transporting ATP synthase complex, coupling factor F(o)	cellular_component	XLOC_034214
1VS9	Down	GO:0009635	0.0151542	0.862871	1	2	response to herbicide	biological_process	XLOC_034334
1VS9	Down	GO:0010242	0.0151542	0.862871	1	2	oxygen evolving activity	molecular_function	XLOC_034334
1VS9	Down	GO:0016021	0.0184485	1	15	743	integral component of membrane	cellular_component	Glyma.06G317100, Glyma.11G066500, Glyma.11G175800, Glyma.16G114900, Glyma.16G180900, Glyma.18G066000, XLOC_004969, XLOC_009133, XLOC_019823, XLOC_025578, XLOC_026945, XLOC_034214, XLOC_034334, XLOC_042521, XLOC_047675
1VS9	Down	GO:0005992	0.0238024	1	1	2	trehalose biosynthetic process	biological_process	XLOC_038060
1VS9	Down	GO:0006090	0.0238198	1	1	2	pyruvate metabolic process	biological_process	Glyma.07G253700
1VS9	Down	GO:0050242	0.0238198	1	1	2	pyruvate, phosphate dikinase activity	molecular_function	Glyma.07G253700
1VS9	Down	GO:0071949	0.0238198	1	1	2	FAD binding	molecular_function	Glyma.17G174500
1VS9	Down	GO:0003690	0.0252506	1	3	55	double-stranded DNA binding	molecular_function	Glyma.09G089600, Glyma.15G000800, XLOC_001320
1VS9	Down	GO:0005802	0.0306809	1	1	3	trans-Golgi network	cellular_component	XLOC_025578
1VS9	Down	GO:0034599	0.0329617	1	1	3	cellular response to oxidative stress	biological_process	Glyma.12G178800
1VS9	Down	GO:0071486	0.0329617	1	1	3	cellular response to high light intensity	biological_process	Glyma.12G178800
1VS9	Down	GO:0048367	0.034044	1	1	3	shoot system development	biological_process	XLOC_025578
1VS9	Down	GO:0004683	0.0355172	1	1	3	calmodulin-dependent protein kinase activity	molecular_function	XLOC_005097
1VS9	Down	GO:0009738	0.0355172	1	1	3	abscisic acid-activated signaling pathway	biological_process	XLOC_005097
1VS9	Down	GO:0009931	0.0355172	1	1	3	calcium-dependent protein serine/threonine kinase activity	molecular_function	XLOC_005097
1VS9	Down	GO:0016310	0.0355172	1	1	3	phosphorylation	biological_process	Glyma.07G253700
1VS9	Down	GO:0018105	0.0355172	1	1	3	peptidyl-serine phosphorylation	biological_process	XLOC_005097
1VS9	Down	GO:0006303	0.0404927	1	1	4	double-strand break repair via nonhomologous end joining	biological_process	XLOC_001320
1VS9	Down	GO:0009058	0.041154	1	4	114	biosynthetic process	biological_process	Glyma.07G258500, Glyma.08G269600, Glyma.09G070500, Glyma.17G015600
1VS9	Down	GO:0032259	0.0420512	1	1	4	methylation	biological_process	XLOC_025578
1VS9	Down	GO:0008429	0.044958	1	1	5	phosphatidylethanolamine binding	molecular_function	Glyma.08G363100
1VS9	Down	GO:0048544	0.0452056	1	2	30	recognition of pollen	biological_process	Glyma.04G139100, Glyma.08G061000
1VS9	Down	GO:0004451	0.0465689	1	1	4	isocitrate lyase activity	molecular_function	Glyma.12G100500
1VS9	Down	GO:0042773	0.0488276	1	1	7	ATP synthesis coupled electron transport	biological_process	XLOC_047675
1VS9	Down	GO:0004970	0.0496119	1	2	31	ionotropic glutamate receptor activity	molecular_function	Glyma.13G233400, Glyma.14G001100
1VS9	Down	GO:0042162	0.0498308	1	1	5	telomeric DNA binding	molecular_function	XLOC_001320
1VS9	Down	GO:0043564	0.0498308	1	1	5	Ku70:Ku80 complex	cellular_component	XLOC_001320
1VS9	Up	GO:0020037	5.28998e-10	9.93987e-07	38	455	heme binding	molecular_function	Glyma.01G130500, Glyma.01G179600, Glyma.01G192500, Glyma.02G135100, Glyma.02G233800, Glyma.02G298800, Glyma.03G007700, Glyma.07G010700, Glyma.07G212800, Glyma.09G048700, Glyma.09G049200, Glyma.09G049300, Glyma.09G277900, Glyma.09G284700, Glyma.10G234700, Glyma.11G062500, Glyma.11G062700, Glyma.11G162100, Glyma.12G195600, Glyma.13G307000, Glyma.14G201600, Glyma.14G201700, Glyma.15G050800, Glyma.15…
1VS9	Up	GO:0006979	1.18816e-06	0.00111627	18	178	response to oxidative stress	biological_process	Glyma.01G130500, Glyma.01G192500, Glyma.01G219400, Glyma.02G135100, Glyma.02G233800, Glyma.03G007700, Glyma.09G277900, Glyma.09G284700, Glyma.11G162100, Glyma.12G195600, Glyma.13G307000, Glyma.14G201600, Glyma.14G201700, Glyma.15G050800, Glyma.16G055900, Glyma.17G052900, Glyma.17G061400, Glyma.20G214200
1VS9	Up	GO:0004601	1.91589e-06	0.00119999	17	164	peroxidase activity	molecular_function	Glyma.01G130500, Glyma.01G192500, Glyma.02G135100, Glyma.02G233800, Glyma.03G007700, Glyma.09G277900, Glyma.09G284700, Glyma.11G162100, Glyma.12G195600, Glyma.13G307000, Glyma.14G201600, Glyma.14G201700, Glyma.15G050800, Glyma.16G055900, Glyma.17G052900, Glyma.17G061400, Glyma.20G214200
1VS9	Up	GO:0003700	3.7141e-06	0.0017447	47	840	transcription factor activity, sequence-specific DNA binding	molecular_function	Glyma.01G020500, Glyma.01G022500, Glyma.01G195900, Glyma.02G073900, Glyma.03G128200, Glyma.03G135800, Glyma.03G142400, Glyma.03G157300, Glyma.03G177500, Glyma.04G057700, Glyma.04G159300, Glyma.04G173500, Glyma.04G201900, Glyma.04G217400, Glyma.04G251400, Glyma.05G033400, Glyma.05G108600, Glyma.06G148400, Glyma.06G163700, Glyma.08G254400, Glyma.08G257300, Glyma.08G320200, Glyma.09G199800, Glyma.09…
1VS9	Up	GO:0006952	6.94529e-05	0.0261004	9	71	defense response	biological_process	Glyma.01G165200, Glyma.06G249800, Glyma.11G078000, Glyma.15G145700, Glyma.15G217100, Glyma.15G218900, Glyma.15G274200, XLOC_022011, XLOC_024782
1VS9	Up	GO:0016705	0.000182327	0.0475075	20	293	oxidoreductase activity, acting on paired donors, with incorporation or reduction of molecular oxygen	molecular_function	Glyma.01G179600, Glyma.02G298800, Glyma.07G010700, Glyma.09G048700, Glyma.09G049200, Glyma.09G049300, Glyma.10G234700, Glyma.11G062500, Glyma.11G062700, Glyma.15G156100, Glyma.15G245300, Glyma.17G015400, Glyma.18G080400, Glyma.18G297200, Glyma.19G003600, Glyma.19G014600, Glyma.20G114200, Glyma.20G147900, Glyma.20G159700, Glyma.U000100
1VS9	Up	GO:0007275	0.000198114	0.0475075	7	44	multicellular organismal development	biological_process	Glyma.01G022500, Glyma.01G195900, Glyma.03G177500, Glyma.05G108600, Glyma.09G199800, Glyma.11G045800, Glyma.17G158300
1VS9	Up	GO:0016020	0.000202267	0.0475075	36	690	membrane	cellular_component	Glyma.02G090000, Glyma.03G168000, Glyma.03G175300, Glyma.03G264100, Glyma.04G055200, Glyma.04G211800, Glyma.04G250900, Glyma.05G001700, Glyma.05G210400, Glyma.06G111900, Glyma.06G112100, Glyma.08G290600, Glyma.09G102800, Glyma.09G146800, Glyma.10G239000, Glyma.12G191500, Glyma.13G004400, Glyma.13G081000, Glyma.13G238600, Glyma.13G338300, Glyma.13G355000, Glyma.14G047700, Glyma.14G148300, Glyma.15…
1VS9	Up	GO:0015238	0.000288621	0.05699	9	79	drug transmembrane transporter activity	molecular_function	Glyma.02G090000, Glyma.05G001700, Glyma.09G102800, Glyma.09G146800, Glyma.10G239000, Glyma.15G274600, Glyma.17G136400, Glyma.19G001600, Glyma.20G155500
1VS9	Up	GO:0006855	0.000315713	0.05699	9	79	drug transmembrane transport	biological_process	Glyma.02G090000, Glyma.05G001700, Glyma.09G102800, Glyma.09G146800, Glyma.10G239000, Glyma.15G274600, Glyma.17G136400, Glyma.19G001600, Glyma.20G155500
1VS9	Up	GO:0015297	0.00033363	0.05699	9	81	antiporter activity	molecular_function	Glyma.02G090000, Glyma.05G001700, Glyma.09G102800, Glyma.09G146800, Glyma.10G239000, Glyma.15G274600, Glyma.17G136400, Glyma.19G001600, Glyma.20G155500
1VS9	Up	GO:0016491	0.000952263	0.149108	34	699	oxidoreductase activity	molecular_function	Glyma.01G155400, Glyma.01G219400, Glyma.02G010100, Glyma.03G099000, Glyma.04G019500, Glyma.05G124800, Glyma.05G124900, Glyma.05G222400, Glyma.07G129000, Glyma.07G142600, Glyma.07G150900, Glyma.07G212800, Glyma.08G039300, Glyma.08G092800, Glyma.08G169700, Glyma.08G169900, Glyma.08G351800, Glyma.08G351900, Glyma.11G035300, Glyma.11G050400, Glyma.11G089300, Glyma.13G030400, Glyma.13G036200, Glyma.13…
1VS9	Up	GO:0003824	0.0011037	0.159528	22	379	catalytic activity	molecular_function	Glyma.01G103100, Glyma.01G118000, Glyma.01G172900, Glyma.01G232400, Glyma.04G103600, Glyma.04G196100, Glyma.05G151200, Glyma.06G068600, Glyma.06G082700, Glyma.06G126300, Glyma.09G029900, Glyma.09G269400, Glyma.11G091600, Glyma.12G019800, Glyma.12G234200, Glyma.13G231700, Glyma.13G285700, Glyma.13G372000, Glyma.14G171700, Glyma.19G218300, XLOC_041702, XLOC_045925
1VS9	Up	GO:0005506	0.00122926	0.164984	20	347	iron ion binding	molecular_function	Glyma.01G179600, Glyma.02G298800, Glyma.07G010700, Glyma.09G048700, Glyma.09G049200, Glyma.09G049300, Glyma.10G234700, Glyma.11G062500, Glyma.11G062700, Glyma.15G156100, Glyma.15G245300, Glyma.17G015400, Glyma.18G080400, Glyma.18G297200, Glyma.19G003600, Glyma.19G014600, Glyma.20G114200, Glyma.20G147900, Glyma.20G159700, Glyma.U000100
1VS9	Up	GO:0008171	0.00222742	0.279022	5	33	O-methyltransferase activity	molecular_function	Glyma.04G227700, Glyma.10G176500, Glyma.10G215700, Glyma.11G256500, Glyma.20G176100
1VS9	Up	GO:0005452	0.00432307	0.477826	3	13	inorganic anion exchanger activity	molecular_function	Glyma.15G011200, Glyma.17G088800, Glyma.19G219500
1VS9	Up	GO:0006820	0.00432307	0.477826	3	13	anion transport	biological_process	Glyma.15G011200, Glyma.17G088800, Glyma.19G219500
1VS9	Up	GO:0030599	0.00505062	0.527229	6	63	pectinesterase activity	molecular_function	Glyma.01G138000, Glyma.02G008400, Glyma.02G086900, Glyma.03G029000, Glyma.10G017200, Glyma.19G212500
1VS9	Up	GO:0005618	0.00647137	0.639984	9	128	cell wall	cellular_component	Glyma.01G138000, Glyma.02G008400, Glyma.02G086900, Glyma.03G029000, Glyma.10G017200, Glyma.17G059800, Glyma.17G064900, Glyma.19G106700, Glyma.19G212500
1VS9	Up	GO:0042545	0.00862197	0.810034	5	50	cell wall modification	biological_process	Glyma.01G138000, Glyma.02G008400, Glyma.03G029000, Glyma.10G017200, Glyma.19G212500
1VS9	Up	GO:0008061	0.0116682	1	1	1	chitin binding	molecular_function	XLOC_024782
1VS9	Up	GO:0006096	0.0126633	1	4	32	glycolytic process	biological_process	Glyma.10G201100, Glyma.19G190100, Glyma.20G136200, XLOC_013425
1VS9	Up	GO:0016891	0.0176342	1	2	7	endoribonuclease activity, producing 5'-phosphomonoesters	molecular_function	Glyma.09G025300, Glyma.09G025400
1VS9	Up	GO:0006810	0.0194136	1	18	380	transport	biological_process	Glyma.01G008200, Glyma.05G162500, Glyma.07G023600, Glyma.08G218200, Glyma.08G290600, Glyma.10G005400, Glyma.10G221100, Glyma.10G227400, Glyma.11G224100, Glyma.11G228000, Glyma.13G119000, Glyma.14G047700, Glyma.16G078100, Glyma.17G096200, Glyma.17G148600, Glyma.18G263200, Glyma.19G016400, Glyma.20G170400
1VS9	Up	GO:0008083	0.0196367	1	2	11	growth factor activity	molecular_function	Glyma.01G195700, Glyma.10G255800
1VS9	Up	GO:0004650	0.0203292	1	3	25	polygalacturonase activity	molecular_function	Glyma.02G009300, Glyma.09G224800, Glyma.15G275400
1VS9	Up	GO:0009925	0.0274964	1	1	1	basal plasma membrane	cellular_component	XLOC_020484
1VS9	Up	GO:0010229	0.0274964	1	1	1	inflorescence development	biological_process	XLOC_020484
1VS9	Up	GO:0010252	0.0274964	1	1	1	auxin homeostasis	biological_process	XLOC_020484
1VS9	Up	GO:0010338	0.0274964	1	1	1	leaf formation	biological_process	XLOC_020484
1VS9	Up	GO:0010358	0.0274964	1	1	1	leaf shaping	biological_process	XLOC_020484
1VS9	Up	GO:0045177	0.0274964	1	1	1	apical part of cell	cellular_component	XLOC_020484
1VS9	Up	GO:0048825	0.0274964	1	1	1	cotyledon development	biological_process	XLOC_020484
1VS9	Up	GO:0048826	0.0274964	1	1	1	cotyledon morphogenesis	biological_process	XLOC_020484
1VS9	Up	GO:0004365	0.0282652	1	1	1	glyceraldehyde-3-phosphate dehydrogenase (NAD+) (phosphorylating) activity	molecular_function	XLOC_013425
1VS9	Up	GO:0022857	0.0291466	1	8	134	transmembrane transporter activity	molecular_function	Glyma.04G171800, Glyma.04G250900, Glyma.06G111900, Glyma.06G112100, Glyma.06G192100, Glyma.13G081000, Glyma.14G148300, Glyma.16G216500
1VS9	Up	GO:0004743	0.0299666	1	3	23	pyruvate kinase activity	molecular_function	Glyma.10G201100, Glyma.19G190100, Glyma.20G136200
1VS9	Up	GO:0004588	0.0300501	1	1	1	orotate phosphoribosyltransferase activity	molecular_function	XLOC_032363
1VS9	Up	GO:0044205	0.0300501	1	1	1	'de novo' UMP biosynthetic process	biological_process	XLOC_032363
1VS9	Up	GO:0004805	0.0304451	1	1	1	trehalose-phosphatase activity	molecular_function	XLOC_045925
1VS9	Up	GO:0030001	0.0372978	1	8	148	metal ion transport	biological_process	Glyma.08G017900, Glyma.10G264100, Glyma.13G004400, Glyma.13G338300, Glyma.15G036200, Glyma.15G104400, Glyma.17G141000, Glyma.20G114400
1VS9	Up	GO:0005215	0.0373322	1	12	244	transporter activity	molecular_function	Glyma.05G162500, Glyma.07G023600, Glyma.08G218200, Glyma.08G290600, Glyma.10G005400, Glyma.10G221100, Glyma.11G224100, Glyma.11G228000, Glyma.14G047700, Glyma.17G096200, Glyma.20G170400, XLOC_020484
1VS9	Up	GO:0004144	0.0433172	1	2	14	diacylglycerol O-acyltransferase activity	molecular_function	Glyma.09G239600, Glyma.18G258100
1VS9	Up	GO:0009308	0.0494652	1	2	14	amine metabolic process	biological_process	Glyma.02G038500, Glyma.17G019300
1VS10	Down	GO:0015979	5.27794e-11	9.91726e-08	13	87	photosynthesis	biological_process	Glyma.04G014500, Glyma.08G154300, Glyma.09G073900, Glyma.09G087700, Glyma.09G090100, Glyma.10G290700, Glyma.15G080200, Glyma.15G174200, Glyma.15G273300, Glyma.18G046700, Glyma.19G126700, Glyma.U016600, XLOC_009133
1VS10	Down	GO:0009523	1.0377e-08	9.74916e-06	10	66	photosystem II	cellular_component	Glyma.04G014500, Glyma.08G154300, Glyma.09G073900, Glyma.10G290700, Glyma.15G174200, Glyma.15G273300, Glyma.18G046700, Glyma.19G126700, XLOC_019823, XLOC_034334
1VS10	Down	GO:0009535	1.52711e-06	0.00095648	6	29	chloroplast thylakoid membrane	cellular_component	XLOC_009133, XLOC_016679, XLOC_019823, XLOC_026945, XLOC_034334, XLOC_047675
1VS10	Down	GO:0008610	2.76385e-06	0.00129832	6	35	lipid biosynthetic process	biological_process	Glyma.04G057800, Glyma.06G058500, Glyma.10G274400, Glyma.12G075100, Glyma.20G115500, Glyma.20G240900
1VS10	Down	GO:0009522	3.48258e-06	0.00130875	6	33	photosystem I	cellular_component	Glyma.07G019700, Glyma.09G087700, Glyma.09G090100, Glyma.13G129500, Glyma.U016600, XLOC_009133
1VS10	Down	GO:0006633	9.99245e-06	0.00281341	7	64	fatty acid biosynthetic process	biological_process	Glyma.04G057800, Glyma.06G058500, Glyma.06G118500, Glyma.10G274400, Glyma.12G075100, Glyma.20G115500, Glyma.20G240900
1VS10	Down	GO:0009654	1.04811e-05	0.00281341	6	40	photosystem II oxygen evolving complex	cellular_component	Glyma.04G014500, Glyma.08G154300, Glyma.10G290700, Glyma.15G273300, Glyma.18G046700, Glyma.19G126700
1VS10	Down	GO:0016168	1.76161e-05	0.00413758	4	13	chlorophyll binding	molecular_function	Glyma.05G074900, XLOC_009133, XLOC_019823, XLOC_034334
1VS10	Down	GO:0016020	0.00026523	0.0553741	19	690	membrane	cellular_component	Glyma.01G058600, Glyma.02G188300, Glyma.04G057800, Glyma.04G240000, Glyma.05G074900, Glyma.06G058500, Glyma.06G118500, Glyma.08G070800, Glyma.08G282600, Glyma.09G160000, Glyma.10G274400, Glyma.11G169900, Glyma.12G075100, Glyma.16G209400, Glyma.17G076500, Glyma.17G108200, Glyma.19G202200, Glyma.20G115500, Glyma.20G240900
1VS10	Down	GO:0009772	0.000324558	0.0609845	3	11	photosynthetic electron transport in photosystem II	biological_process	Glyma.04G095000, XLOC_019823, XLOC_034334
1VS10	Down	GO:0005509	0.000844543	0.144263	6	92	calcium ion binding	molecular_function	Glyma.04G014500, Glyma.08G154300, Glyma.10G290700, Glyma.15G273300, Glyma.18G046700, Glyma.19G126700
1VS10	Down	GO:0018298	0.000972225	0.152234	3	18	protein-chromophore linkage	biological_process	XLOC_009133, XLOC_019823, XLOC_034334
1VS10	Down	GO:0009579	0.00145931	0.210927	2	5	thylakoid	cellular_component	Glyma.09G090100, Glyma.U016600
1VS10	Down	GO:0010207	0.00160299	0.215144	2	5	photosystem II assembly	biological_process	Glyma.12G200200, Glyma.13G302100
1VS10	Down	GO:0045156	0.00240789	0.301628	2	6	electron transporter, transferring electrons within the cyclic electron transport pathway of photosynthesis activity	molecular_function	XLOC_019823, XLOC_034334
1VS10	Down	GO:0009507	0.00554177	0.650812	5	90	chloroplast	cellular_component	XLOC_009133, XLOC_014132, XLOC_014230, XLOC_016679, XLOC_047675
1VS10	Down	GO:0045261	0.00636348	0.690465	2	11	proton-transporting ATP synthase complex, catalytic core F(1)	cellular_component	Glyma.13G204800, XLOC_016679
1VS10	Down	GO:0009408	0.00673743	0.690465	2	10	response to heat	biological_process	XLOC_001320, XLOC_004454
1VS10	Down	GO:0019684	0.00698182	0.690465	2	10	photosynthesis, light reaction	biological_process	Glyma.04G095000, XLOC_026945
1VS10	Down	GO:0009765	0.00919275	0.863659	3	34	photosynthesis, light harvesting	biological_process	Glyma.07G047600, Glyma.15G179400, Glyma.20G212900
1VS10	Down	GO:0006508	0.00981727	0.878412	7	211	proteolysis	biological_process	Glyma.03G199100, Glyma.05G132000, Glyma.06G272800, Glyma.07G205400, Glyma.12G179600, Glyma.19G045800, Glyma.19G196700
1VS10	Down	GO:0046933	0.0109824	0.907664	2	14	proton-transporting ATP synthase activity, rotational mechanism	molecular_function	Glyma.13G204800, XLOC_016679
1VS10	Down	GO:0003825	0.0115423	0.907664	1	1	alpha,alpha-trehalose-phosphate synthase (UDP-forming) activity	molecular_function	XLOC_038060
1VS10	Down	GO:0009538	0.0115934	0.907664	2	13	photosystem I reaction center	cellular_component	Glyma.07G019700, Glyma.13G129500
1VS10	Down	GO:0008757	0.012769	0.922807	1	1	S-adenosylmethionine-dependent methyltransferase activity	molecular_function	XLOC_025578
1VS10	Down	GO:0010289	0.012769	0.922807	1	1	homogalacturonan biosynthetic process	biological_process	XLOC_025578
1VS10	Down	GO:0004003	0.0182928	1	2	19	ATP-dependent DNA helicase activity	molecular_function	Glyma.17G262000, XLOC_001320
1VS10	Down	GO:0071949	0.0193306	1	1	2	FAD binding	molecular_function	Glyma.17G174500
1VS10	Down	GO:0006468	0.023356	1	10	520	protein phosphorylation	biological_process	Glyma.03G027200, Glyma.04G139100, Glyma.04G244000, Glyma.06G257500, Glyma.08G061000, Glyma.10G081300, Glyma.13G032600, Glyma.15G227000, Glyma.16G065700, Glyma.U024800
1VS10	Down	GO:0005992	0.0239041	1	1	2	trehalose biosynthetic process	biological_process	XLOC_038060
1VS10	Down	GO:0009635	0.0256804	1	1	2	response to herbicide	biological_process	XLOC_034334
1VS10	Down	GO:0010242	0.0256804	1	1	2	oxygen evolving activity	molecular_function	XLOC_034334
1VS10	Down	GO:0015986	0.025763	1	2	21	ATP synthesis coupled proton transport	biological_process	Glyma.13G204800, XLOC_016679
1VS10	Down	GO:0048544	0.0344659	1	2	30	recognition of pollen	biological_process	Glyma.04G139100, Glyma.08G061000
1VS10	Down	GO:0048038	0.0345505	1	2	26	quinone binding	molecular_function	XLOC_026945, XLOC_047675
1VS10	Down	GO:0005802	0.0379929	1	1	3	trans-Golgi network	cellular_component	XLOC_025578
1VS10	Down	GO:0048367	0.0381196	1	1	3	shoot system development	biological_process	XLOC_025578
1VS10	Down	GO:0003682	0.0425003	1	2	28	chromatin binding	molecular_function	XLOC_029250, XLOC_039617
1VS10	Down	GO:0006303	0.0458371	1	1	4	double-strand break repair via nonhomologous end joining	biological_process	XLOC_001320
1VS10	Down	GO:0009058	0.0463263	1	4	114	biosynthetic process	biological_process	Glyma.07G258500, Glyma.08G269600, Glyma.09G070500, Glyma.17G015600
1VS10	Down	GO:0007155	0.0482867	1	1	5	cell adhesion	biological_process	XLOC_025578
1VS10	Up	GO:0020037	5.67489e-18	1.06631e-14	50	455	heme binding	molecular_function	Glyma.01G130500, Glyma.01G130800, Glyma.01G179600, Glyma.01G192500, Glyma.02G008900, Glyma.02G052700, Glyma.02G135100, Glyma.02G135200, Glyma.02G233800, Glyma.02G298800, Glyma.03G160300, Glyma.04G035000, Glyma.06G221700, Glyma.07G010700, Glyma.07G212800, Glyma.08G274500, Glyma.09G048700, Glyma.09G048900, Glyma.09G049200, Glyma.09G049300, Glyma.09G057100, Glyma.09G277900, Glyma.09G279100, Glyma.09…
1VS10	Up	GO:0006979	4.08898e-12	3.50412e-09	25	178	response to oxidative stress	biological_process	Glyma.01G130500, Glyma.01G130800, Glyma.01G192500, Glyma.01G219400, Glyma.02G008900, Glyma.02G052700, Glyma.02G135100, Glyma.02G135200, Glyma.02G233800, Glyma.06G221700, Glyma.09G057100, Glyma.09G277900, Glyma.09G284400, Glyma.09G284700, Glyma.10G009400, Glyma.10G191700, Glyma.11G162100, Glyma.13G307000, Glyma.14G201600, Glyma.14G201700, Glyma.16G055900, Glyma.17G052900, Glyma.17G061400, Glyma.18…
1VS10	Up	GO:0004601	5.59465e-12	3.50412e-09	24	164	peroxidase activity	molecular_function	Glyma.01G130500, Glyma.01G130800, Glyma.01G192500, Glyma.02G008900, Glyma.02G052700, Glyma.02G135100, Glyma.02G135200, Glyma.02G233800, Glyma.06G221700, Glyma.09G057100, Glyma.09G277900, Glyma.09G284400, Glyma.09G284700, Glyma.10G009400, Glyma.10G191700, Glyma.11G162100, Glyma.13G307000, Glyma.14G201600, Glyma.14G201700, Glyma.16G055900, Glyma.17G052900, Glyma.17G061400, Glyma.18G055500, Glyma.20…
1VS10	Up	GO:0003700	1.86758e-07	8.77294e-05	49	840	transcription factor activity, sequence-specific DNA binding	molecular_function	Glyma.01G022500, Glyma.01G195900, Glyma.01G232000, Glyma.02G073900, Glyma.03G111700, Glyma.03G128200, Glyma.03G135800, Glyma.03G142400, Glyma.03G157300, Glyma.03G162500, Glyma.03G177500, Glyma.04G057700, Glyma.04G173500, Glyma.04G201900, Glyma.04G217400, Glyma.04G251400, Glyma.05G033400, Glyma.06G058400, Glyma.06G148400, Glyma.06G163700, Glyma.08G254400, Glyma.08G257300, Glyma.08G320200, Glyma.09…
1VS10	Up	GO:0016705	3.41902e-07	0.000128487	25	293	oxidoreductase activity, acting on paired donors, with incorporation or reduction of molecular oxygen	molecular_function	Glyma.01G179600, Glyma.02G298800, Glyma.03G160300, Glyma.04G035000, Glyma.07G010700, Glyma.08G274500, Glyma.09G048700, Glyma.09G048900, Glyma.09G049200, Glyma.09G049300, Glyma.09G279100, Glyma.10G234600, Glyma.10G234700, Glyma.11G062500, Glyma.11G062700, Glyma.15G156100, Glyma.15G245300, Glyma.17G015400, Glyma.18G080400, Glyma.18G297200, Glyma.19G014600, Glyma.20G114200, Glyma.20G147900, Glyma.20…
1VS10	Up	GO:0005506	5.31929e-06	0.00166582	25	347	iron ion binding	molecular_function	Glyma.01G179600, Glyma.02G298800, Glyma.03G160300, Glyma.04G035000, Glyma.07G010700, Glyma.08G274500, Glyma.09G048700, Glyma.09G048900, Glyma.09G049200, Glyma.09G049300, Glyma.09G279100, Glyma.10G234600, Glyma.10G234700, Glyma.11G062500, Glyma.11G062700, Glyma.15G156100, Glyma.15G245300, Glyma.17G015400, Glyma.18G080400, Glyma.18G297200, Glyma.19G014600, Glyma.20G114200, Glyma.20G147900, Glyma.20…
1VS10	Up	GO:0008171	0.000252955	0.0679003	6	33	O-methyltransferase activity	molecular_function	Glyma.04G227700, Glyma.10G176500, Glyma.10G215700, Glyma.11G256500, Glyma.18G269600, Glyma.20G176100
1VS10	Up	GO:0016491	0.000587796	0.138059	34	699	oxidoreductase activity	molecular_function	Glyma.01G155400, Glyma.01G219400, Glyma.02G010100, Glyma.03G099000, Glyma.04G121700, Glyma.05G124800, Glyma.05G124900, Glyma.05G222400, Glyma.07G129000, Glyma.07G142600, Glyma.07G212800, Glyma.08G039300, Glyma.08G080900, Glyma.08G092800, Glyma.08G169700, Glyma.08G169900, Glyma.08G351800, Glyma.09G046400, Glyma.11G035300, Glyma.13G030400, Glyma.13G036200, Glyma.13G186200, Glyma.15G112700, Glyma.15…
1VS10	Up	GO:0030599	0.0008674	0.173995	7	63	pectinesterase activity	molecular_function	Glyma.01G138000, Glyma.02G008400, Glyma.02G086900, Glyma.03G216000, Glyma.10G010500, Glyma.10G017200, Glyma.19G212500
1VS10	Up	GO:0016020	0.00102968	0.173995	33	690	membrane	cellular_component	Glyma.02G090000, Glyma.03G168000, Glyma.03G175300, Glyma.03G222300, Glyma.03G264100, Glyma.04G055200, Glyma.04G250900, Glyma.05G001700, Glyma.05G210400, Glyma.06G111900, Glyma.06G112100, Glyma.08G290600, Glyma.09G102800, Glyma.09G146800, Glyma.10G239000, Glyma.12G191500, Glyma.13G004400, Glyma.13G081000, Glyma.13G238600, Glyma.13G338300, Glyma.13G355000, Glyma.14G047700, Glyma.14G148300, Glyma.15…
1VS10	Up	GO:0007275	0.00114325	0.173995	6	44	multicellular organismal development	biological_process	Glyma.01G022500, Glyma.01G195900, Glyma.03G177500, Glyma.09G199800, Glyma.11G045800, Glyma.17G158300
1VS10	Up	GO:0015238	0.00114413	0.173995	8	79	drug transmembrane transporter activity	molecular_function	Glyma.02G090000, Glyma.05G001700, Glyma.09G102800, Glyma.09G146800, Glyma.10G239000, Glyma.15G274600, Glyma.17G136400, Glyma.20G155500
1VS10	Up	GO:0006855	0.00123701	0.173995	8	79	drug transmembrane transport	biological_process	Glyma.02G090000, Glyma.05G001700, Glyma.09G102800, Glyma.09G146800, Glyma.10G239000, Glyma.15G274600, Glyma.17G136400, Glyma.20G155500
1VS10	Up	GO:0015297	0.0012964	0.173995	8	81	antiporter activity	molecular_function	Glyma.02G090000, Glyma.05G001700, Glyma.09G102800, Glyma.09G146800, Glyma.10G239000, Glyma.15G274600, Glyma.17G136400, Glyma.20G155500
1VS10	Up	GO:0006952	0.00172567	0.216169	7	71	defense response	biological_process	Glyma.01G165200, Glyma.06G249800, Glyma.11G078000, Glyma.15G145700, Glyma.15G218900, Glyma.15G274200, XLOC_022011
1VS10	Up	GO:0005452	0.00399981	0.442096	3	13	inorganic anion exchanger activity	molecular_function	Glyma.03G222300, Glyma.17G088800, Glyma.19G219500
1VS10	Up	GO:0006820	0.00399981	0.442096	3	13	anion transport	biological_process	Glyma.03G222300, Glyma.17G088800, Glyma.19G219500
1VS10	Up	GO:0005618	0.00542891	0.566718	9	128	cell wall	cellular_component	Glyma.01G138000, Glyma.02G008400, Glyma.02G086900, Glyma.03G216000, Glyma.10G010500, Glyma.10G017200, Glyma.17G059800, Glyma.17G064900, Glyma.19G212500
1VS10	Up	GO:0042545	0.0076993	0.76142	5	50	cell wall modification	biological_process	Glyma.01G138000, Glyma.02G008400, Glyma.03G216000, Glyma.10G017200, Glyma.19G212500
1VS10	Up	GO:0006810	0.0151103	1	18	380	transport	biological_process	Glyma.01G008200, Glyma.01G041400, Glyma.07G023600, Glyma.08G218200, Glyma.08G290600, Glyma.10G005400, Glyma.10G137600, Glyma.10G221100, Glyma.10G227400, Glyma.11G228000, Glyma.13G119000, Glyma.14G047700, Glyma.16G078100, Glyma.16G155100, Glyma.17G148600, Glyma.18G263200, Glyma.19G016400, Glyma.20G170400
1VS10	Up	GO:0006873	0.0160935	1	2	8	cellular ion homeostasis	biological_process	Glyma.04G027300, Glyma.10G229300
1VS10	Up	GO:0008308	0.0160935	1	2	8	voltage-gated anion channel activity	molecular_function	Glyma.04G027300, Glyma.10G229300
1VS10	Up	GO:0003824	0.0167471	1	18	379	catalytic activity	molecular_function	Glyma.01G103100, Glyma.01G172900, Glyma.01G232400, Glyma.04G103600, Glyma.08G176600, Glyma.09G029900, Glyma.09G269400, Glyma.09G269500, Glyma.11G091600, Glyma.12G019800, Glyma.12G234200, Glyma.13G231700, Glyma.13G285700, Glyma.13G369800, Glyma.13G372000, Glyma.14G171700, Glyma.19G218300, XLOC_045925
1VS10	Up	GO:0016021	0.0172353	1	29	743	integral component of membrane	cellular_component	Glyma.01G008200, Glyma.03G113600, Glyma.03G171600, Glyma.04G027300, Glyma.04G102600, Glyma.04G171800, Glyma.06G103900, Glyma.06G154200, Glyma.06G192100, Glyma.08G177400, Glyma.08G182800, Glyma.09G122600, Glyma.10G006700, Glyma.10G137600, Glyma.10G227400, Glyma.10G229300, Glyma.13G119000, Glyma.13G213300, Glyma.14G101100, Glyma.15G055600, Glyma.16G078100, Glyma.16G180800, Glyma.16G216500, Glyma.18…
1VS10	Up	GO:0042626	0.0226728	1	7	102	ATPase activity, coupled to transmembrane movement of substances	molecular_function	Glyma.01G008200, Glyma.10G137600, Glyma.10G227400, Glyma.13G119000, Glyma.16G078100, Glyma.18G263200, Glyma.19G016400
1VS10	Up	GO:0010181	0.0230101	1	3	23	FMN binding	molecular_function	Glyma.13G186200, Glyma.15G223900, Glyma.17G049900
1VS10	Up	GO:0022857	0.0252796	1	8	134	transmembrane transporter activity	molecular_function	Glyma.04G171800, Glyma.04G250900, Glyma.06G111900, Glyma.06G112100, Glyma.06G192100, Glyma.13G081000, Glyma.14G148300, Glyma.16G216500
1VS10	Up	GO:0004743	0.0279142	1	3	23	pyruvate kinase activity	molecular_function	Glyma.10G201100, Glyma.19G190100, Glyma.20G136200
1VS10	Up	GO:0009349	0.0283509	1	1	1	riboflavin synthase complex	cellular_component	XLOC_010715
1VS10	Up	GO:0004805	0.0296162	1	1	1	trehalose-phosphatase activity	molecular_function	XLOC_045925
1VS10	Up	GO:0010154	0.0296938	1	1	1	fruit development	biological_process	XLOC_028354
1VS10	Up	GO:0032441	0.0296938	1	1	1	pheophorbide a oxygenase activity	molecular_function	XLOC_028354
1VS10	Up	GO:0004519	0.0468177	1	3	33	endonuclease activity	molecular_function	Glyma.07G050300, XLOC_016623, XLOC_038594
1VS11	Down	GO:0009523	1.94417e-08	3.65309e-05	10	66	photosystem II	cellular_component	Glyma.01G050900, Glyma.02G094900, Glyma.04G014500, Glyma.04G241000, Glyma.09G073900, Glyma.10G290700, Glyma.18G046700, Glyma.19G126700, XLOC_019823, XLOC_034334
1VS11	Down	GO:0015979	2.46365e-07	0.00023146	10	87	photosynthesis	biological_process	Glyma.01G050900, Glyma.02G094900, Glyma.04G014500, Glyma.04G241000, Glyma.09G073900, Glyma.09G090100, Glyma.10G290700, Glyma.18G046700, Glyma.19G126700, Glyma.U016600
1VS11	Down	GO:0009654	9.85853e-07	0.000617472	7	40	photosystem II oxygen evolving complex	cellular_component	Glyma.01G050900, Glyma.02G094900, Glyma.04G014500, Glyma.04G241000, Glyma.10G290700, Glyma.18G046700, Glyma.19G126700
1VS11	Down	GO:0009772	1.06443e-05	0.00500018	4	11	photosynthetic electron transport in photosystem II	biological_process	Glyma.04G095000, Glyma.06G217900, XLOC_019823, XLOC_034334
1VS11	Down	GO:0005509	2.58553e-05	0.0097164	8	92	calcium ion binding	molecular_function	Glyma.01G050900, Glyma.02G094900, Glyma.04G014500, Glyma.04G241000, Glyma.10G290700, Glyma.17G242400, Glyma.18G046700, Glyma.19G126700
1VS11	Down	GO:0009535	4.1475e-05	0.0129886	5	29	chloroplast thylakoid membrane	cellular_component	XLOC_016679, XLOC_019823, XLOC_034334, XLOC_042521, XLOC_047675
1VS11	Down	GO:0008610	7.38523e-05	0.0198241	5	35	lipid biosynthetic process	biological_process	Glyma.04G057800, Glyma.06G058500, Glyma.10G274400, Glyma.20G115500, Glyma.20G240900
1VS11	Down	GO:0009765	9.07495e-05	0.0213148	5	34	photosynthesis, light harvesting	biological_process	Glyma.07G047600, Glyma.08G074000, Glyma.09G154700, Glyma.15G179400, Glyma.16G145800
1VS11	Down	GO:0006633	0.000165404	0.0345327	6	64	fatty acid biosynthetic process	biological_process	Glyma.04G057800, Glyma.06G058500, Glyma.06G118500, Glyma.10G274400, Glyma.20G115500, Glyma.20G240900
1VS11	Down	GO:0045261	0.000267864	0.0489917	3	11	proton-transporting ATP synthase complex, catalytic core F(1)	cellular_component	Glyma.02G184000, Glyma.13G204800, XLOC_016679
1VS11	Down	GO:0019684	0.000286806	0.0489917	3	10	photosynthesis, light reaction	biological_process	Glyma.04G095000, Glyma.06G217900, XLOC_042521
1VS11	Down	GO:0042132	0.000498257	0.0780188	3	12	fructose 1,6-bisphosphate 1-phosphatase activity	molecular_function	Glyma.07G142700, Glyma.10G225400, Glyma.18G193600
1VS11	Down	GO:0046933	0.000625875	0.0889868	3	14	proton-transporting ATP synthase activity, rotational mechanism	molecular_function	Glyma.02G184000, Glyma.13G204800, XLOC_016679
1VS11	Down	GO:0016168	0.00066302	0.0889868	3	13	chlorophyll binding	molecular_function	Glyma.08G281300, XLOC_019823, XLOC_034334
1VS11	Down	GO:0008289	0.000732414	0.091747	4	38	lipid binding	molecular_function	Glyma.03G016600, Glyma.07G076800, Glyma.12G194400, Glyma.13G308200
1VS11	Down	GO:0006468	0.00127328	0.149531	14	520	protein phosphorylation	biological_process	Glyma.03G027200, Glyma.04G244000, Glyma.06G257500, Glyma.06G258200, Glyma.08G061000, Glyma.08G066000, Glyma.12G007000, Glyma.12G140200, Glyma.13G032600, Glyma.13G352900, Glyma.15G021300, Glyma.15G227000, Glyma.17G214100, Glyma.U024800
1VS11	Down	GO:0016705	0.00152242	0.168272	11	293	oxidoreductase activity, acting on paired donors, with incorporation or reduction of molecular oxygen	molecular_function	Glyma.02G119600, Glyma.03G030900, Glyma.05G042500, Glyma.12G191400, Glyma.13G147500, Glyma.14G117200, Glyma.17G209100, Glyma.19G015000, Glyma.20G007200, Glyma.20G018600, Glyma.20G188000
1VS11	Down	GO:0009579	0.00169152	0.176575	2	5	thylakoid	cellular_component	Glyma.09G090100, Glyma.U016600
1VS11	Down	GO:0016620	0.00190242	0.182878	3	20	oxidoreductase activity, acting on the aldehyde or oxo group of donors, NAD or NADP as acceptor	molecular_function	Glyma.04G015900, Glyma.16G044900, Glyma.19G106800
1VS11	Down	GO:0005506	0.00194655	0.182878	12	347	iron ion binding	molecular_function	Glyma.02G119600, Glyma.03G030900, Glyma.05G042500, Glyma.12G191400, Glyma.13G147500, Glyma.14G117200, Glyma.17G209100, Glyma.19G015000, Glyma.20G007200, Glyma.20G018600, Glyma.20G188000, XLOC_034334
1VS11	Down	GO:0016020	0.00209825	0.187744	18	690	membrane	cellular_component	Glyma.04G057800, Glyma.04G240000, Glyma.06G058500, Glyma.06G106200, Glyma.06G118500, Glyma.08G281300, Glyma.08G282600, Glyma.10G086800, Glyma.10G274400, Glyma.11G169900, Glyma.12G020400, Glyma.12G133700, Glyma.14G191300, Glyma.19G202200, Glyma.20G017100, Glyma.20G115500, Glyma.20G187400, Glyma.20G240900
1VS11	Down	GO:0015986	0.00235242	0.200918	3	21	ATP synthesis coupled proton transport	biological_process	Glyma.02G184000, Glyma.13G204800, XLOC_016679
1VS11	Down	GO:0045156	0.00272503	0.222623	2	6	electron transporter, transferring electrons within the cyclic electron transport pathway of photosynthesis activity	molecular_function	XLOC_019823, XLOC_034334
1VS11	Down	GO:0009522	0.0102594	0.803229	3	33	photosystem I	cellular_component	Glyma.08G204800, Glyma.09G090100, Glyma.U016600
1VS11	Down	GO:0003825	0.0126209	0.948586	1	1	alpha,alpha-trehalose-phosphate synthase (UDP-forming) activity	molecular_function	XLOC_038060
1VS11	Down	GO:0045017	0.0137601	0.994429	1	1	glycerolipid biosynthetic process	biological_process	Glyma.12G114900
1VS11	Down	GO:0006090	0.0148911	0.999302	1	2	pyruvate metabolic process	biological_process	Glyma.07G253700
1VS11	Down	GO:0050242	0.0148911	0.999302	1	2	pyruvate, phosphate dikinase activity	molecular_function	Glyma.07G253700
1VS11	Down	GO:0018298	0.0197531	1	2	18	protein-chromophore linkage	biological_process	XLOC_019823, XLOC_034334
1VS11	Down	GO:0016310	0.0205227	1	1	3	phosphorylation	biological_process	Glyma.07G253700
1VS11	Down	GO:0005992	0.0258683	1	1	2	trehalose biosynthetic process	biological_process	XLOC_038060
1VS11	Down	GO:0009635	0.0273323	1	1	2	response to herbicide	biological_process	XLOC_034334
1VS11	Down	GO:0010242	0.0273323	1	1	2	oxygen evolving activity	molecular_function	XLOC_034334
1VS11	Down	GO:0005215	0.0351014	1	7	244	transporter activity	molecular_function	Glyma.01G081700, Glyma.08G328400, Glyma.10G005300, Glyma.14G191300, Glyma.17G096400, Glyma.18G299200, Glyma.18G300400
1VS11	Down	GO:0015116	0.0367419	1	2	26	sulfate transmembrane transporter activity	molecular_function	Glyma.06G106200, Glyma.20G017100
1VS11	Down	GO:0020037	0.0370192	1	11	455	heme binding	molecular_function	Glyma.02G119600, Glyma.03G030900, Glyma.05G042500, Glyma.12G191400, Glyma.13G147500, Glyma.14G117200, Glyma.17G209100, Glyma.19G015000, Glyma.20G007200, Glyma.20G018600, Glyma.20G188000
1VS11	Down	GO:0048038	0.0407208	1	2	26	quinone binding	molecular_function	XLOC_042521, XLOC_047675
1VS11	Down	GO:0008272	0.04306	1	2	28	sulfate transport	biological_process	Glyma.06G106200, Glyma.20G017100
1VS11	Down	GO:0048544	0.0430702	1	2	30	recognition of pollen	biological_process	Glyma.06G258200, Glyma.08G061000
1VS11	Down	GO:0004451	0.0496641	1	1	4	isocitrate lyase activity	molecular_function	Glyma.12G100500
1VS11	Down	GO:0008271	0.0497518	1	2	30	secondary active sulfate transmembrane transporter activity	molecular_function	Glyma.06G106200, Glyma.20G017100
1VS11	Up	GO:0020037	1.28351e-11	2.41171e-08	42	455	heme binding	molecular_function	Glyma.01G179600, Glyma.01G192500, Glyma.02G052700, Glyma.02G135100, Glyma.02G135200, Glyma.02G233800, Glyma.02G298800, Glyma.05G019200, Glyma.06G221700, Glyma.07G010700, Glyma.07G089700, Glyma.07G202400, Glyma.07G212800, Glyma.09G022500, Glyma.09G048700, Glyma.09G048900, Glyma.09G049200, Glyma.09G049300, Glyma.09G277900, Glyma.09G284700, Glyma.10G009400, Glyma.11G062500, Glyma.11G062700, Glyma.11…
1VS11	Up	GO:0004601	3.51308e-08	3.30054e-05	20	164	peroxidase activity	molecular_function	Glyma.01G192500, Glyma.02G052700, Glyma.02G135100, Glyma.02G135200, Glyma.02G233800, Glyma.06G221700, Glyma.09G022500, Glyma.09G277900, Glyma.09G284700, Glyma.10G009400, Glyma.11G162100, Glyma.12G195600, Glyma.13G306900, Glyma.13G307000, Glyma.14G201700, Glyma.16G055900, Glyma.17G052900, Glyma.17G061400, Glyma.18G055500, Glyma.20G214200
1VS11	Up	GO:0006979	1.17844e-07	7.38094e-05	20	178	response to oxidative stress	biological_process	Glyma.01G192500, Glyma.02G052700, Glyma.02G135100, Glyma.02G135200, Glyma.02G233800, Glyma.06G221700, Glyma.09G022500, Glyma.09G277900, Glyma.09G284700, Glyma.10G009400, Glyma.11G162100, Glyma.12G195600, Glyma.13G306900, Glyma.13G307000, Glyma.14G201700, Glyma.16G055900, Glyma.17G052900, Glyma.17G061400, Glyma.18G055500, Glyma.20G214200
1VS11	Up	GO:0007275	4.22322e-06	0.00198386	9	44	multicellular organismal development	biological_process	Glyma.01G022500, Glyma.01G195900, Glyma.03G177500, Glyma.05G108600, Glyma.09G199800, Glyma.11G045800, Glyma.14G089200, Glyma.17G158300, Glyma.18G244600
1VS11	Up	GO:0016705	0.000125951	0.0414445	21	293	oxidoreductase activity, acting on paired donors, with incorporation or reduction of molecular oxygen	molecular_function	Glyma.01G179600, Glyma.02G298800, Glyma.05G019200, Glyma.07G010700, Glyma.07G089700, Glyma.07G202400, Glyma.09G048700, Glyma.09G048900, Glyma.09G049200, Glyma.09G049300, Glyma.11G062500, Glyma.11G062700, Glyma.15G243300, Glyma.15G245300, Glyma.16G210300, Glyma.17G015400, Glyma.17G080500, Glyma.18G297200, Glyma.19G003600, Glyma.19G014600, Glyma.20G114200
1VS11	Up	GO:0006810	0.00013234	0.0414445	25	380	transport	biological_process	Glyma.01G008200, Glyma.01G200100, Glyma.02G073600, Glyma.04G003200, Glyma.04G192500, Glyma.07G018000, Glyma.07G023600, Glyma.08G218200, Glyma.08G290600, Glyma.08G342600, Glyma.09G238200, Glyma.10G005400, Glyma.10G221100, Glyma.10G227300, Glyma.10G227400, Glyma.11G224100, Glyma.11G224500, Glyma.13G119000, Glyma.14G047700, Glyma.16G078100, Glyma.16G155100, Glyma.17G148600, Glyma.18G263200, Glyma.19…
1VS11	Up	GO:0003700	0.00024422	0.0612716	43	840	transcription factor activity, sequence-specific DNA binding	molecular_function	Glyma.01G022500, Glyma.01G195900, Glyma.03G111700, Glyma.03G128200, Glyma.03G135800, Glyma.03G157300, Glyma.03G162500, Glyma.03G177500, Glyma.04G159300, Glyma.04G173500, Glyma.04G201900, Glyma.05G033400, Glyma.05G105600, Glyma.05G108600, Glyma.06G024900, Glyma.06G029600, Glyma.06G148400, Glyma.07G017300, Glyma.09G184300, Glyma.09G199800, Glyma.09G231600, Glyma.09G240000, Glyma.10G016500, Glyma.11…
1VS11	Up	GO:0005215	0.000260869	0.0612716	18	244	transporter activity	molecular_function	Glyma.01G200100, Glyma.02G073600, Glyma.04G003200, Glyma.04G192500, Glyma.07G018000, Glyma.07G023600, Glyma.08G218200, Glyma.08G290600, Glyma.09G238200, Glyma.10G005400, Glyma.10G221100, Glyma.11G224100, Glyma.11G224500, Glyma.14G047700, Glyma.16G155100, Glyma.20G170400, XLOC_020351, XLOC_020484
1VS11	Up	GO:0050660	0.000511097	0.0942641	10	100	flavin adenine dinucleotide binding	molecular_function	Glyma.01G048800, Glyma.02G108400, Glyma.04G079700, Glyma.05G124800, Glyma.05G124900, Glyma.05G125800, Glyma.09G063900, Glyma.16G019900, Glyma.16G020100, Glyma.17G054500
1VS11	Up	GO:0042555	0.000535388	0.0942641	3	6	MCM complex	cellular_component	Glyma.03G219200, Glyma.09G047300, Glyma.19G216100
1VS11	Up	GO:0006952	0.000551839	0.0942641	8	71	defense response	biological_process	Glyma.01G165200, Glyma.06G249800, Glyma.11G078000, Glyma.15G217100, Glyma.15G218900, Glyma.15G274200, XLOC_022011, XLOC_024782
1VS11	Up	GO:0005506	0.000934927	0.144655	21	347	iron ion binding	molecular_function	Glyma.01G179600, Glyma.02G298800, Glyma.05G019200, Glyma.07G010700, Glyma.07G089700, Glyma.07G202400, Glyma.09G048700, Glyma.09G048900, Glyma.09G049200, Glyma.09G049300, Glyma.11G062500, Glyma.11G062700, Glyma.15G243300, Glyma.15G245300, Glyma.16G210300, Glyma.17G015400, Glyma.17G080500, Glyma.18G297200, Glyma.19G003600, Glyma.19G014600, Glyma.20G114200
1VS11	Up	GO:0016020	0.00100081	0.144655	35	690	membrane	cellular_component	Glyma.01G200100, Glyma.03G168000, Glyma.03G175300, Glyma.03G222300, Glyma.04G055200, Glyma.04G192500, Glyma.04G250900, Glyma.05G001700, Glyma.05G210400, Glyma.06G112100, Glyma.06G324300, Glyma.08G288500, Glyma.08G290600, Glyma.09G102800, Glyma.09G146800, Glyma.10G205600, Glyma.10G239000, Glyma.11G224500, Glyma.12G191500, Glyma.13G081000, Glyma.13G338300, Glyma.14G047700, Glyma.14G148100, Glyma.14…
1VS11	Up	GO:0016021	0.00166013	0.222813	35	743	integral component of membrane	cellular_component	Glyma.01G008200, Glyma.01G200100, Glyma.03G171600, Glyma.04G014000, Glyma.04G027300, Glyma.04G102600, Glyma.04G171800, Glyma.06G313500, Glyma.07G102500, Glyma.07G141600, Glyma.07G251900, Glyma.08G182800, Glyma.08G342600, Glyma.09G099500, Glyma.10G006700, Glyma.10G227300, Glyma.10G227400, Glyma.11G224500, Glyma.13G119000, Glyma.13G186400, Glyma.13G213300, Glyma.13G323800, Glyma.14G074100, Glyma.14…
1VS11	Up	GO:0006270	0.0033701	0.422162	3	11	DNA replication initiation	biological_process	Glyma.03G219200, Glyma.09G047300, Glyma.19G216100
1VS11	Up	GO:0022857	0.00489572	0.517408	10	134	transmembrane transporter activity	molecular_function	Glyma.04G171800, Glyma.04G250900, Glyma.06G112100, Glyma.06G313500, Glyma.13G081000, Glyma.13G186400, Glyma.14G148100, Glyma.14G148300, Glyma.16G216500, Glyma.19G173800
1VS11	Up	GO:0005452	0.00495654	0.517408	3	13	inorganic anion exchanger activity	molecular_function	Glyma.03G222300, Glyma.17G088800, Glyma.19G219500
1VS11	Up	GO:0006820	0.00495654	0.517408	3	13	anion transport	biological_process	Glyma.03G222300, Glyma.17G088800, Glyma.19G219500
1VS11	Up	GO:0005507	0.00530907	0.52504	7	75	copper ion binding	molecular_function	Glyma.02G038500, Glyma.04G019500, Glyma.07G142600, Glyma.12G192800, Glyma.17G019300, Glyma.18G193400, Glyma.20G145100
1VS11	Up	GO:0009308	0.00579444	0.544388	3	14	amine metabolic process	biological_process	Glyma.02G038500, Glyma.17G019300, Glyma.20G145100
1VS11	Up	GO:0008131	0.00677687	0.601483	3	15	primary amine oxidase activity	molecular_function	Glyma.02G038500, Glyma.17G019300, Glyma.20G145100
1VS11	Up	GO:0016614	0.00705773	0.601483	3	15	oxidoreductase activity, acting on CH-OH group of donors	molecular_function	Glyma.01G048800, Glyma.02G108400, Glyma.10G183000
1VS11	Up	GO:0015238	0.00736249	0.601483	7	79	drug transmembrane transporter activity	molecular_function	Glyma.05G001700, Glyma.09G102800, Glyma.09G146800, Glyma.10G239000, Glyma.15G274600, Glyma.17G136400, Glyma.20G155500
1VS11	Up	GO:0006855	0.00785075	0.612701	7	79	drug transmembrane transport	biological_process	Glyma.05G001700, Glyma.09G102800, Glyma.09G146800, Glyma.10G239000, Glyma.15G274600, Glyma.17G136400, Glyma.20G155500
1VS11	Up	GO:0015297	0.00815195	0.612701	7	81	antiporter activity	molecular_function	Glyma.05G001700, Glyma.09G102800, Glyma.09G146800, Glyma.10G239000, Glyma.15G274600, Glyma.17G136400, Glyma.20G155500
1VS11	Up	GO:0016887	0.0106099	0.766766	5	47	ATPase activity	molecular_function	Glyma.06G202200, Glyma.10G227300, Glyma.10G227400, Glyma.18G263200, XLOC_020351
1VS11	Up	GO:0042626	0.0110906	0.771826	8	102	ATPase activity, coupled to transmembrane movement of substances	molecular_function	Glyma.01G008200, Glyma.08G342600, Glyma.10G227300, Glyma.10G227400, Glyma.13G119000, Glyma.16G078100, Glyma.18G263200, Glyma.19G016400
1VS11	Up	GO:0008061	0.0122565	0.822496	1	1	chitin binding	molecular_function	XLOC_024782
1VS11	Up	GO:0048038	0.0135341	0.876917	3	26	quinone binding	molecular_function	Glyma.02G038500, Glyma.17G019300, Glyma.20G145100
1VS11	Up	GO:0006468	0.0140525	0.880158	25	520	protein phosphorylation	biological_process	Glyma.01G062900, Glyma.03G003300, Glyma.06G211600, Glyma.07G069000, Glyma.08G198900, Glyma.08G235800, Glyma.08G357200, Glyma.09G243600, Glyma.10G261600, Glyma.10G271900, Glyma.12G007300, Glyma.12G142400, Glyma.12G188100, Glyma.13G034500, Glyma.13G174900, Glyma.13G300000, Glyma.14G118800, Glyma.14G157600, Glyma.15G021800, Glyma.15G069500, Glyma.15G111600, Glyma.16G092600, Glyma.18G249700, Glyma.19…
1VS11	Up	GO:0008171	0.0161393	0.978249	4	33	O-methyltransferase activity	molecular_function	Glyma.04G227700, Glyma.10G215700, Glyma.11G256500, Glyma.20G176100
1VS11	Up	GO:0003824	0.0175629	1	19	379	catalytic activity	molecular_function	Glyma.01G172900, Glyma.01G232400, Glyma.03G063000, Glyma.04G103600, Glyma.04G196100, Glyma.05G151200, Glyma.06G068600, Glyma.09G029900, Glyma.09G269400, Glyma.09G269500, Glyma.11G126300, Glyma.12G019800, Glyma.12G234200, Glyma.13G285700, Glyma.13G369800, Glyma.13G372000, Glyma.14G171700, Glyma.19G218300, XLOC_045925
1VS11	Up	GO:0016491	0.0201337	1	30	699	oxidoreductase activity	molecular_function	Glyma.03G099000, Glyma.04G019500, Glyma.04G121700, Glyma.05G023700, Glyma.05G124800, Glyma.05G124900, Glyma.05G125800, Glyma.05G222400, Glyma.07G142600, Glyma.07G212800, Glyma.08G039300, Glyma.08G092800, Glyma.08G169700, Glyma.08G169900, Glyma.09G063900, Glyma.11G035300, Glyma.12G192800, Glyma.13G030400, Glyma.13G036200, Glyma.16G019900, Glyma.16G020100, Glyma.16G072000, Glyma.16G153400, Glyma.17…
1VS11	Up	GO:0003678	0.0250014	1	3	31	DNA helicase activity	molecular_function	Glyma.03G219200, Glyma.09G047300, Glyma.19G216100
1VS11	Up	GO:0009925	0.028871	1	1	1	basal plasma membrane	cellular_component	XLOC_020484
1VS11	Up	GO:0010229	0.028871	1	1	1	inflorescence development	biological_process	XLOC_020484
1VS11	Up	GO:0010252	0.028871	1	1	1	auxin homeostasis	biological_process	XLOC_020484
1VS11	Up	GO:0010338	0.028871	1	1	1	leaf formation	biological_process	XLOC_020484
1VS11	Up	GO:0010358	0.028871	1	1	1	leaf shaping	biological_process	XLOC_020484
1VS11	Up	GO:0045177	0.028871	1	1	1	apical part of cell	cellular_component	XLOC_020484
1VS11	Up	GO:0048825	0.028871	1	1	1	cotyledon development	biological_process	XLOC_020484
1VS11	Up	GO:0048826	0.028871	1	1	1	cotyledon morphogenesis	biological_process	XLOC_020484
1VS11	Up	GO:0016740	0.0294818	1	2	16	transferase activity	molecular_function	Glyma.09G184300, XLOC_010715
1VS11	Up	GO:0003885	0.0302076	1	2	10	D-arabinono-1,4-lactone oxidase activity	molecular_function	Glyma.16G019900, Glyma.16G020100
1VS11	Up	GO:0009349	0.0306007	1	1	1	riboflavin synthase complex	cellular_component	XLOC_010715
1VS11	Up	GO:0004805	0.0319647	1	1	1	trehalose-phosphatase activity	molecular_function	XLOC_045925
1VS11	Up	GO:0001882	0.0320255	1	1	1	nucleoside binding	molecular_function	Glyma.01G187400
1VS11	Up	GO:0010600	0.0320484	1	1	1	regulation of auxin biosynthetic process	biological_process	XLOC_022764
1VS11	Up	GO:0004743	0.0339343	1	3	23	pyruvate kinase activity	molecular_function	Glyma.10G201100, Glyma.19G190100, Glyma.20G136200
1VS11	Up	GO:0042545	0.0441423	1	4	50	cell wall modification	biological_process	Glyma.01G138000, Glyma.03G216000, Glyma.10G017200, Glyma.19G212500
1VS11	Up	GO:0009734	0.0458375	1	2	15	auxin-activated signaling pathway	biological_process	XLOC_020484, XLOC_022764
1VS11	Up	GO:0030001	0.0473431	1	8	148	metal ion transport	biological_process	Glyma.08G017900, Glyma.09G120000, Glyma.13G208400, Glyma.13G338300, Glyma.14G189500, Glyma.15G036200, Glyma.15G104400, Glyma.17G141000
1VS12	Down	GO:0015979	2.09026e-08	3.9276e-05	11	87	photosynthesis	biological_process	Glyma.02G094900, Glyma.04G241000, Glyma.06G321900, Glyma.08G154300, Glyma.09G073900, Glyma.09G090100, Glyma.10G290700, Glyma.15G273300, Glyma.18G046700, Glyma.19G126700, Glyma.U016600
1VS12	Down	GO:0009523	2.53887e-07	0.000238527	9	66	photosystem II	cellular_component	Glyma.02G094900, Glyma.04G241000, Glyma.08G154300, Glyma.09G073900, Glyma.10G290700, Glyma.15G273300, Glyma.18G046700, Glyma.19G126700, XLOC_019823
1VS12	Down	GO:0009654	9.61488e-07	0.000602212	7	40	photosystem II oxygen evolving complex	cellular_component	Glyma.02G094900, Glyma.04G241000, Glyma.08G154300, Glyma.10G290700, Glyma.15G273300, Glyma.18G046700, Glyma.19G126700
1VS12	Down	GO:0009765	8.97037e-05	0.0421383	5	34	photosynthesis, light harvesting	biological_process	Glyma.07G047600, Glyma.08G074000, Glyma.16G016100, Glyma.18G028400, Glyma.20G212900
1VS12	Down	GO:0005509	0.000175189	0.065836	7	92	calcium ion binding	molecular_function	Glyma.02G094900, Glyma.04G241000, Glyma.08G154300, Glyma.10G290700, Glyma.15G273300, Glyma.18G046700, Glyma.19G126700
1VS12	Down	GO:0019684	0.000287273	0.0899643	3	10	photosynthesis, light reaction	biological_process	Glyma.06G217900, XLOC_026945, XLOC_042521
1VS12	Down	GO:0042132	0.000493322	0.132422	3	12	fructose 1,6-bisphosphate 1-phosphatase activity	molecular_function	Glyma.07G142700, Glyma.10G225400, Glyma.18G193600
1VS12	Down	GO:0009535	0.000614777	0.144396	4	29	chloroplast thylakoid membrane	cellular_component	XLOC_016679, XLOC_019823, XLOC_026945, XLOC_042521
1VS12	Down	GO:0008610	0.000866556	0.180918	4	35	lipid biosynthetic process	biological_process	Glyma.06G058500, Glyma.10G274400, Glyma.12G075100, Glyma.20G115500
1VS12	Down	GO:0009522	0.00102894	0.193338	4	33	photosystem I	cellular_component	Glyma.06G321900, Glyma.09G090100, Glyma.13G357300, Glyma.U016600
1VS12	Down	GO:0006633	0.00122895	0.209927	5	64	fatty acid biosynthetic process	biological_process	Glyma.06G058500, Glyma.10G274400, Glyma.12G075100, Glyma.17G069100, Glyma.20G115500
1VS12	Down	GO:0009579	0.00164829	0.258094	2	5	thylakoid	cellular_component	Glyma.09G090100, Glyma.U016600
1VS12	Down	GO:0010207	0.00181667	0.262579	2	5	photosystem II assembly	biological_process	Glyma.12G200200, Glyma.13G302100
1VS12	Down	GO:0004061	0.00268121	0.359857	2	6	arylformamidase activity	molecular_function	Glyma.10G263400, Glyma.20G126800
1VS12	Down	GO:0045261	0.00713946	0.894336	2	11	proton-transporting ATP synthase complex, catalytic core F(1)	cellular_component	Glyma.13G204800, XLOC_016679
1VS12	Down	GO:0016655	0.00787946	0.925345	2	10	oxidoreductase activity, acting on NAD(P)H, quinone or similar compound as acceptor	molecular_function	XLOC_026945, XLOC_042521
1VS12	Down	GO:0009772	0.0095607	1	2	11	photosynthetic electron transport in photosystem II	biological_process	Glyma.06G217900, XLOC_019823
1VS12	Down	GO:0000160	0.0119111	1	3	51	phosphorelay signal transduction system	biological_process	Glyma.07G015600, Glyma.08G201100, Glyma.15G019500
1VS12	Down	GO:0006090	0.0119335	1	1	2	pyruvate metabolic process	biological_process	Glyma.07G253700
1VS12	Down	GO:0050242	0.0119335	1	1	2	pyruvate, phosphate dikinase activity	molecular_function	Glyma.07G253700
1VS12	Down	GO:0046933	0.0123255	1	2	14	proton-transporting ATP synthase activity, rotational mechanism	molecular_function	Glyma.13G204800, XLOC_016679
1VS12	Down	GO:0016705	0.0124991	1	9	293	oxidoreductase activity, acting on paired donors, with incorporation or reduction of molecular oxygen	molecular_function	Glyma.02G119600, Glyma.05G042500, Glyma.06G176100, Glyma.13G262100, Glyma.14G059900, Glyma.17G209100, Glyma.19G015000, Glyma.20G007200, Glyma.20G188000
1VS12	Down	GO:0016168	0.013316	1	2	13	chlorophyll binding	molecular_function	Glyma.08G281300, XLOC_019823
1VS12	Down	GO:0005506	0.0136479	1	10	347	iron ion binding	molecular_function	Glyma.02G119600, Glyma.05G042500, Glyma.06G176100, Glyma.13G262100, Glyma.14G059900, Glyma.17G069100, Glyma.17G209100, Glyma.19G015000, Glyma.20G007200, Glyma.20G188000
1VS12	Down	GO:0045017	0.0137687	1	1	1	glycerolipid biosynthetic process	biological_process	Glyma.12G114900
1VS12	Down	GO:0016310	0.0164516	1	1	3	phosphorylation	biological_process	Glyma.07G253700
1VS12	Down	GO:0015986	0.0288633	1	2	21	ATP synthesis coupled proton transport	biological_process	Glyma.13G204800, XLOC_016679
1VS12	Down	GO:0030604	0.0352205	1	1	3	1-deoxy-D-xylulose-5-phosphate reductoisomerase activity	molecular_function	Glyma.16G089000
1VS12	Down	GO:0048544	0.0379351	1	2	30	recognition of pollen	biological_process	Glyma.06G258200, Glyma.08G061000
1VS12	Down	GO:0048038	0.0384462	1	2	26	quinone binding	molecular_function	XLOC_026945, XLOC_042521
1VS12	Down	GO:0006508	0.0404953	1	6	211	proteolysis	biological_process	Glyma.05G132000, Glyma.06G272800, Glyma.07G205400, Glyma.12G179600, Glyma.19G045800, Glyma.19G196700
1VS12	Down	GO:0034599	0.0407348	1	1	3	cellular response to oxidative stress	biological_process	Glyma.12G178800
1VS12	Down	GO:0071486	0.0407348	1	1	3	cellular response to high light intensity	biological_process	Glyma.12G178800
1VS12	Down	GO:0004451	0.0482628	1	1	4	isocitrate lyase activity	molecular_function	Glyma.12G100500
1VS12	Down	GO:0070402	0.048508	1	1	4	NADPH binding	molecular_function	Glyma.16G089000
1VS12	Up	GO:0020037	3.33324e-13	6.26315e-10	43	455	heme binding	molecular_function	Glyma.01G130500, Glyma.01G179600, Glyma.01G192500, Glyma.02G008900, Glyma.02G052700, Glyma.02G135100, Glyma.02G233800, Glyma.02G298800, Glyma.04G035000, Glyma.06G221700, Glyma.07G010700, Glyma.07G212800, Glyma.08G181500, Glyma.09G048700, Glyma.09G049200, Glyma.09G057100, Glyma.09G160900, Glyma.09G277900, Glyma.09G279100, Glyma.09G284700, Glyma.10G009400, Glyma.10G234700, Glyma.11G062500, Glyma.11…
1VS12	Up	GO:0004601	2.89648e-10	2.72124e-07	22	164	peroxidase activity	molecular_function	Glyma.01G130500, Glyma.01G192500, Glyma.02G008900, Glyma.02G052700, Glyma.02G135100, Glyma.02G233800, Glyma.06G221700, Glyma.07G130800, Glyma.08G181500, Glyma.09G057100, Glyma.09G277900, Glyma.09G284700, Glyma.10G009400, Glyma.11G162100, Glyma.12G195600, Glyma.13G307000, Glyma.14G201700, Glyma.15G050800, Glyma.16G055900, Glyma.17G052900, Glyma.17G061400, Glyma.18G055500
1VS12	Up	GO:0006979	1.13652e-09	7.11843e-07	22	178	response to oxidative stress	biological_process	Glyma.01G130500, Glyma.01G192500, Glyma.01G219400, Glyma.02G008900, Glyma.02G052700, Glyma.02G135100, Glyma.02G233800, Glyma.06G221700, Glyma.08G181500, Glyma.09G057100, Glyma.09G277900, Glyma.09G284700, Glyma.10G009400, Glyma.11G162100, Glyma.12G195600, Glyma.13G307000, Glyma.14G201700, Glyma.15G050800, Glyma.16G055900, Glyma.17G052900, Glyma.17G061400, Glyma.18G055500
1VS12	Up	GO:0003700	9.36912e-08	4.40115e-05	50	840	transcription factor activity, sequence-specific DNA binding	molecular_function	Glyma.01G232000, Glyma.02G073900, Glyma.03G111700, Glyma.03G128200, Glyma.03G135800, Glyma.03G142400, Glyma.03G157300, Glyma.03G177500, Glyma.04G057700, Glyma.04G159300, Glyma.04G173500, Glyma.04G201900, Glyma.04G217400, Glyma.05G033400, Glyma.05G105600, Glyma.06G058400, Glyma.06G125100, Glyma.06G148400, Glyma.06G163700, Glyma.06G205800, Glyma.07G017300, Glyma.07G218000, Glyma.08G254400, Glyma.08…
1VS12	Up	GO:0016491	1.46084e-05	0.00548983	39	699	oxidoreductase activity	molecular_function	Glyma.01G155400, Glyma.01G219400, Glyma.02G010100, Glyma.03G057100, Glyma.03G099000, Glyma.04G019500, Glyma.04G121700, Glyma.05G124800, Glyma.05G124900, Glyma.07G130800, Glyma.07G142600, Glyma.07G150900, Glyma.07G212800, Glyma.08G039300, Glyma.08G080900, Glyma.08G092800, Glyma.08G169700, Glyma.08G169900, Glyma.08G351800, Glyma.08G351900, Glyma.09G063900, Glyma.09G189200, Glyma.11G035300, Glyma.12…
1VS12	Up	GO:0016705	4.93471e-05	0.0154539	21	293	oxidoreductase activity, acting on paired donors, with incorporation or reduction of molecular oxygen	molecular_function	Glyma.01G179600, Glyma.02G298800, Glyma.04G035000, Glyma.07G010700, Glyma.09G048700, Glyma.09G049200, Glyma.09G160900, Glyma.09G279100, Glyma.10G234700, Glyma.11G062500, Glyma.11G062700, Glyma.15G245300, Glyma.16G210300, Glyma.18G297200, Glyma.19G003600, Glyma.19G014600, Glyma.19G090800, Glyma.20G114200, Glyma.20G147900, Glyma.20G159700, Glyma.U000100
1VS12	Up	GO:0016020	0.000147691	0.0396445	36	690	membrane	cellular_component	Glyma.01G200100, Glyma.02G090100, Glyma.03G168000, Glyma.03G168100, Glyma.03G175300, Glyma.03G222300, Glyma.03G264100, Glyma.04G055200, Glyma.04G250900, Glyma.05G001700, Glyma.05G210400, Glyma.06G111900, Glyma.06G112100, Glyma.08G290600, Glyma.09G102800, Glyma.09G146800, Glyma.10G239000, Glyma.11G042000, Glyma.12G191500, Glyma.13G081000, Glyma.13G338300, Glyma.13G355000, Glyma.14G047700, Glyma.14…
1VS12	Up	GO:0015238	0.000255953	0.0541773	9	79	drug transmembrane transporter activity	molecular_function	Glyma.02G090100, Glyma.05G001700, Glyma.09G102800, Glyma.09G146800, Glyma.10G239000, Glyma.15G274600, Glyma.17G136400, Glyma.17G136500, Glyma.20G155500
1VS12	Up	GO:0006855	0.000280592	0.0541773	9	79	drug transmembrane transport	biological_process	Glyma.02G090100, Glyma.05G001700, Glyma.09G102800, Glyma.09G146800, Glyma.10G239000, Glyma.15G274600, Glyma.17G136400, Glyma.17G136500, Glyma.20G155500
1VS12	Up	GO:0015297	0.000295951	0.0541773	9	81	antiporter activity	molecular_function	Glyma.02G090100, Glyma.05G001700, Glyma.09G102800, Glyma.09G146800, Glyma.10G239000, Glyma.15G274600, Glyma.17G136400, Glyma.17G136500, Glyma.20G155500
1VS12	Up	GO:0006810	0.000317164	0.0541773	23	380	transport	biological_process	Glyma.01G008200, Glyma.01G041400, Glyma.01G200100, Glyma.02G073700, Glyma.06G036200, Glyma.07G023600, Glyma.08G218200, Glyma.08G290600, Glyma.09G238200, Glyma.10G005400, Glyma.10G221100, Glyma.10G227400, Glyma.11G042000, Glyma.11G224100, Glyma.13G119000, Glyma.14G047700, Glyma.16G078100, Glyma.16G155100, Glyma.17G148600, Glyma.18G259500, Glyma.18G263200, Glyma.19G016400, Glyma.20G170400
1VS12	Up	GO:0005506	0.000391023	0.0612277	21	347	iron ion binding	molecular_function	Glyma.01G179600, Glyma.02G298800, Glyma.04G035000, Glyma.07G010700, Glyma.09G048700, Glyma.09G049200, Glyma.09G160900, Glyma.09G279100, Glyma.10G234700, Glyma.11G062500, Glyma.11G062700, Glyma.15G245300, Glyma.16G210300, Glyma.18G297200, Glyma.19G003600, Glyma.19G014600, Glyma.19G090800, Glyma.20G114200, Glyma.20G147900, Glyma.20G159700, Glyma.U000100
1VS12	Up	GO:0006468	0.000856014	0.123727	28	520	protein phosphorylation	biological_process	Glyma.02G206300, Glyma.03G002700, Glyma.03G003300, Glyma.04G026700, Glyma.04G053100, Glyma.05G024000, Glyma.06G117900, Glyma.06G220200, Glyma.06G256400, Glyma.07G069000, Glyma.08G235800, Glyma.09G243600, Glyma.12G007300, Glyma.12G142300, Glyma.12G142400, Glyma.13G034500, Glyma.13G106500, Glyma.13G248900, Glyma.13G300000, Glyma.14G118800, Glyma.14G157600, Glyma.15G021800, Glyma.15G021900, Glyma.15…
1VS12	Up	GO:0005215	0.000979401	0.13145	16	244	transporter activity	molecular_function	Glyma.01G041400, Glyma.01G200100, Glyma.02G073700, Glyma.06G036200, Glyma.07G023600, Glyma.08G218200, Glyma.08G290600, Glyma.09G238200, Glyma.10G005400, Glyma.10G221100, Glyma.11G042000, Glyma.11G224100, Glyma.14G047700, Glyma.16G155100, Glyma.18G259500, Glyma.20G170400
1VS12	Up	GO:0006952	0.00174306	0.218347	7	71	defense response	biological_process	Glyma.06G249800, Glyma.11G078000, Glyma.15G145900, Glyma.15G217100, Glyma.15G218900, Glyma.15G274200, XLOC_024782
1VS12	Up	GO:0005507	0.00374443	0.432569	7	75	copper ion binding	molecular_function	Glyma.02G038500, Glyma.04G019500, Glyma.07G142600, Glyma.12G097700, Glyma.17G019300, Glyma.18G193400, Glyma.20G145100
1VS12	Up	GO:0005452	0.00414382	0.432569	3	13	inorganic anion exchanger activity	molecular_function	Glyma.03G222300, Glyma.17G088800, Glyma.19G219500
1VS12	Up	GO:0006820	0.00414382	0.432569	3	13	anion transport	biological_process	Glyma.03G222300, Glyma.17G088800, Glyma.19G219500
1VS12	Up	GO:0009308	0.00491714	0.486279	3	14	amine metabolic process	biological_process	Glyma.02G038500, Glyma.17G019300, Glyma.20G145100
1VS12	Up	GO:0008131	0.00573065	0.538395	3	15	primary amine oxidase activity	molecular_function	Glyma.02G038500, Glyma.17G019300, Glyma.20G145100
1VS12	Up	GO:0008061	0.0111589	0.965046	1	1	chitin binding	molecular_function	XLOC_024782
1VS12	Up	GO:0048038	0.0112991	0.965046	3	26	quinone binding	molecular_function	Glyma.02G038500, Glyma.17G019300, Glyma.20G145100
1VS12	Up	GO:0006096	0.0120209	0.982055	4	32	glycolytic process	biological_process	Glyma.04G104500, Glyma.06G105600, Glyma.10G201100, Glyma.19G190100
1VS12	Up	GO:0008171	0.0127513	0.998324	4	33	O-methyltransferase activity	molecular_function	Glyma.04G227700, Glyma.09G094600, Glyma.10G176500, Glyma.11G256500
1VS12	Up	GO:0004619	0.014967	1	2	7	phosphoglycerate mutase activity	molecular_function	Glyma.04G104500, Glyma.06G105600
1VS12	Up	GO:0006873	0.0161872	1	2	8	cellular ion homeostasis	biological_process	Glyma.04G027300, Glyma.10G229300
1VS12	Up	GO:0008308	0.0161872	1	2	8	voltage-gated anion channel activity	molecular_function	Glyma.04G027300, Glyma.10G229300
1VS12	Up	GO:0050660	0.0165849	1	7	100	flavin adenine dinucleotide binding	molecular_function	Glyma.04G079700, Glyma.05G124800, Glyma.05G124900, Glyma.08G080900, Glyma.09G063900, Glyma.15G132600, Glyma.16G019900
1VS12	Up	GO:0009349	0.0283293	1	1	1	riboflavin synthase complex	cellular_component	XLOC_010715
1VS12	Up	GO:0004672	0.0311558	1	64	1827	protein kinase activity	molecular_function	Glyma.02G206300, Glyma.03G002700, Glyma.03G003300, Glyma.04G020100, Glyma.04G026700, Glyma.04G035100, Glyma.04G053100, Glyma.04G056900, Glyma.04G063100, Glyma.04G093200, Glyma.05G024000, Glyma.05G168800, Glyma.06G057300, Glyma.06G086800, Glyma.06G117900, Glyma.06G220200, Glyma.06G256400, Glyma.06G307600, Glyma.07G004600, Glyma.07G069000, Glyma.08G125800, Glyma.08G167300, Glyma.08G227200, Glyma.08…
1VS12	Up	GO:0006351	0.0349351	1	8	142	transcription, DNA-templated	biological_process	Glyma.03G128200, Glyma.03G142400, Glyma.10G092100, Glyma.11G183700, Glyma.13G316900, Glyma.14G167000, Glyma.19G145300, XLOC_016210
1VS12	Up	GO:0005618	0.0461522	1	7	128	cell wall	cellular_component	Glyma.02G086900, Glyma.03G216000, Glyma.10G017200, Glyma.17G059800, Glyma.17G064900, Glyma.19G106700, Glyma.19G212500
2VS3	Down	GO:0006772	0.00140472	1	1	1	thiamine metabolic process	biological_process	XLOC_015695
2VS3	Down	GO:0044715	0.00140472	1	1	1	8-oxo-dGDP phosphatase activity	molecular_function	XLOC_015695
2VS3	Down	GO:0004553	0.00870678	1	3	365	hydrolase activity, hydrolyzing O-glycosyl compounds	molecular_function	Glyma.06G157200, Glyma.10G017000, Glyma.17G252400
2VS3	Down	GO:0004097	0.00921503	1	1	9	catechol oxidase activity	molecular_function	Glyma.18G225000
2VS3	Down	GO:0008083	0.0172852	1	1	11	growth factor activity	molecular_function	Glyma.12G181700
2VS3	Down	GO:0009734	0.0199819	1	1	15	auxin-activated signaling pathway	biological_process	XLOC_029029
2VS3	Down	GO:0015116	0.025259	1	1	26	sulfate transmembrane transporter activity	molecular_function	Glyma.15G014000
2VS3	Down	GO:0008272	0.0283962	1	1	28	sulfate transport	biological_process	Glyma.15G014000
2VS3	Down	GO:0008152	0.0287257	1	3	583	metabolic process	biological_process	Glyma.02G029900, Glyma.11G120600, Glyma.18G225000
2VS3	Down	GO:0008271	0.031538	1	1	30	secondary active sulfate transmembrane transporter activity	molecular_function	Glyma.15G014000
2VS3	Down	GO:0005829	0.0459569	1	1	32	cytosol	cellular_component	XLOC_015695
2VS3	Up	GO:0006101	0.000310334	0.291559	1	1	citrate metabolic process	biological_process	XLOC_026551
2VS3	Up	GO:0048027	0.000310334	0.291559	1	1	mRNA 5'-UTR binding	molecular_function	XLOC_026551
2VS3	Up	GO:0003994	0.000630276	0.394763	1	2	aconitate hydratase activity	molecular_function	XLOC_026551
2VS3	Up	GO:0009651	0.00211981	0.8364	1	7	response to salt stress	biological_process	XLOC_026551
2VS3	Up	GO:0006102	0.00222565	0.8364	1	7	isocitrate metabolic process	biological_process	XLOC_026551
2VS3	Up	GO:0005773	0.00299605	0.938264	1	10	vacuole	cellular_component	XLOC_026551
2VS3	Up	GO:0048046	0.00420093	1	1	14	apoplast	cellular_component	XLOC_026551
2VS3	Up	GO:0051539	0.0056284	1	1	19	4 iron, 4 sulfur cluster binding	molecular_function	XLOC_026551
2VS3	Up	GO:0006099	0.00700369	1	1	23	tricarboxylic acid cycle	biological_process	XLOC_026551
2VS3	Up	GO:0009506	0.00848403	1	1	29	plasmodesma	cellular_component	XLOC_026551
2VS3	Up	GO:0005829	0.00919647	1	1	32	cytosol	cellular_component	XLOC_026551
2VS3	Up	GO:0005886	0.0225368	1	1	77	plasma membrane	cellular_component	XLOC_026551
2VS3	Up	GO:0005507	0.0229193	1	1	75	copper ion binding	molecular_function	XLOC_026551
2VS3	Up	GO:0005739	0.0308328	1	1	104	mitochondrion	cellular_component	XLOC_026551
2VS3	Up	GO:0030001	0.0441993	1	1	148	metal ion transport	biological_process	Glyma.07G267700
2VS3	Up	GO:0004722	0.0473326	1	1	153	protein serine/threonine phosphatase activity	molecular_function	XLOC_042750
2VS4	Down	GO:0004553	9.78213e-05	0.127724	6	365	hydrolase activity, hydrolyzing O-glycosyl compounds	molecular_function	Glyma.05G109600, Glyma.10G017000, Glyma.10G251700, Glyma.13G218300, Glyma.15G093700, Glyma.17G252400
2VS4	Down	GO:0005215	0.000135949	0.127724	5	244	transporter activity	molecular_function	Glyma.10G296600, Glyma.13G167700, Glyma.17G115300, Glyma.17G139400, Glyma.20G247400
2VS4	Down	GO:0006810	0.000759741	0.475851	5	380	transport	biological_process	Glyma.10G296600, Glyma.13G167700, Glyma.17G115300, Glyma.17G139400, Glyma.20G247400
2VS4	Down	GO:0010468	0.00259207	1	1	1	regulation of gene expression	biological_process	XLOC_040788
2VS4	Down	GO:0006073	0.00637573	1	2	49	cellular glucan metabolic process	biological_process	Glyma.05G109600, Glyma.10G251700
2VS4	Down	GO:0016762	0.00663497	1	2	50	xyloglucan:xyloglucosyl transferase activity	molecular_function	Glyma.05G109600, Glyma.10G251700
2VS4	Down	GO:0004652	0.00861452	1	1	8	polynucleotide adenylyltransferase activity	molecular_function	Glyma.09G107600
2VS4	Down	GO:0004066	0.0131074	1	1	8	asparagine synthase (glutamine-hydrolyzing) activity	molecular_function	Glyma.11G170300
2VS4	Down	GO:0006873	0.0186214	1	1	8	cellular ion homeostasis	biological_process	Glyma.16G173600
2VS4	Down	GO:0008308	0.0186214	1	1	8	voltage-gated anion channel activity	molecular_function	Glyma.16G173600
2VS4	Down	GO:0004523	0.028522	1	1	13	RNA-DNA hybrid ribonuclease activity	molecular_function	XLOC_004560
2VS4	Down	GO:0005618	0.0340998	1	2	128	cell wall	cellular_component	Glyma.05G109600, Glyma.10G251700
2VS4	Down	GO:0009734	0.0346781	1	1	15	auxin-activated signaling pathway	biological_process	XLOC_029029
2VS4	Down	GO:0015079	0.0415681	1	1	29	potassium ion transmembrane transporter activity	molecular_function	Glyma.08G056100
2VS4	Down	GO:0005777	0.0465466	1	1	27	peroxisome	cellular_component	XLOC_040788
2VS4	Up	GO:0048364	4.22855e-05	0.0794545	2	6	root development	biological_process	XLOC_025578, XLOC_028335
2VS4	Up	GO:0008757	0.00185491	0.74909	1	1	S-adenosylmethionine-dependent methyltransferase activity	molecular_function	XLOC_025578
2VS4	Up	GO:0010289	0.00185491	0.74909	1	1	homogalacturonan biosynthetic process	biological_process	XLOC_025578
2VS4	Up	GO:0042335	0.00187511	0.74909	1	1	cuticle development	biological_process	XLOC_028335
2VS4	Up	GO:0043565	0.00199332	0.74909	2	38	sequence-specific DNA binding	molecular_function	XLOC_002575, XLOC_028335
2VS4	Up	GO:0009626	0.00326863	1	1	2	plant-type hypersensitive response	biological_process	XLOC_037205
2VS4	Up	GO:0048765	0.00374682	1	1	2	root hair cell differentiation	biological_process	XLOC_028335
2VS4	Up	GO:0005802	0.00464284	1	1	3	trans-Golgi network	cellular_component	XLOC_025578
2VS4	Up	GO:0048367	0.00531858	1	1	3	shoot system development	biological_process	XLOC_025578
2VS4	Up	GO:0032259	0.00645983	1	1	4	methylation	biological_process	XLOC_025578
2VS4	Up	GO:0043481	0.00667344	1	1	4	anthocyanin accumulation in tissues in response to UV light	biological_process	XLOC_028335
2VS4	Up	GO:0009735	0.00865921	1	1	5	response to cytokinin	biological_process	XLOC_025578
2VS4	Up	GO:0007155	0.00929938	1	1	5	cell adhesion	biological_process	XLOC_025578
2VS4	Up	GO:0008097	0.0108446	1	1	6	5S rRNA binding	molecular_function	XLOC_042614
2VS4	Up	GO:0005768	0.0111559	1	1	7	endosome	cellular_component	XLOC_025578
2VS4	Up	GO:0004619	0.0124729	1	1	7	phosphoglycerate mutase activity	molecular_function	Glyma.05G180500
2VS4	Up	GO:0005774	0.0130978	1	1	8	vacuolar membrane	cellular_component	XLOC_025578
2VS4	Up	GO:0009678	0.0185937	1	1	10	hydrogen-translocating pyrophosphatase activity	molecular_function	Glyma.07G156900
2VS4	Up	GO:0003677	0.0204005	1	5	925	DNA binding	molecular_function	Glyma.03G117500, Glyma.06G238100, Glyma.15G076200, Glyma.18G005600, Glyma.19G146000
2VS4	Up	GO:0015035	0.0211507	1	2	137	protein disulfide oxidoreductase activity	molecular_function	Glyma.08G295600, Glyma.10G021300
2VS4	Up	GO:0005794	0.0213336	1	1	13	Golgi apparatus	cellular_component	XLOC_025578
2VS4	Up	GO:0006351	0.0245856	1	2	142	transcription, DNA-templated	biological_process	XLOC_002575, XLOC_028335
2VS4	Up	GO:0043531	0.0272503	1	2	152	ADP binding	molecular_function	Glyma.03G054100, XLOC_037205
2VS4	Up	GO:0050664	0.0305968	1	1	17	oxidoreductase activity, acting on NAD(P)H, oxygen as acceptor	molecular_function	Glyma.20G029600
2VS4	Up	GO:0000139	0.0310615	1	1	18	Golgi membrane	cellular_component	XLOC_025578
2VS4	Up	GO:0006298	0.033871	1	1	20	mismatch repair	biological_process	Glyma.20G073400
2VS4	Up	GO:0004427	0.0356197	1	1	20	inorganic diphosphatase activity	molecular_function	Glyma.07G156900
2VS4	Up	GO:0015992	0.0384456	1	1	22	proton transport	biological_process	Glyma.07G156900
2VS4	Up	GO:0016760	0.0401433	1	1	24	cellulose synthase (UDP-forming) activity	molecular_function	Glyma.12G191700
2VS4	Up	GO:0008168	0.0407774	1	1	25	methyltransferase activity	molecular_function	XLOC_025578
2VS5	Down	GO:0015979	2.83414e-08	5.32535e-05	12	87	photosynthesis	biological_process	Glyma.04G241000, Glyma.05G172300, Glyma.08G304200, Glyma.09G073900, Glyma.09G087700, Glyma.09G090100, Glyma.10G256000, Glyma.10G290700, Glyma.15G208300, Glyma.18G046700, Glyma.U016600, XLOC_009133
2VS5	Down	GO:0009523	2.06146e-07	0.000193674	10	66	photosystem II	cellular_component	Glyma.02G141700, Glyma.04G241000, Glyma.05G172300, Glyma.08G304200, Glyma.09G073900, Glyma.10G290700, Glyma.15G208300, Glyma.18G046700, XLOC_019823, XLOC_034334
2VS5	Down	GO:0009522	1.44366e-06	0.000904215	7	33	photosystem I	cellular_component	Glyma.07G019700, Glyma.09G087700, Glyma.09G090100, Glyma.10G256000, Glyma.13G129500, Glyma.U016600, XLOC_009133
2VS5	Down	GO:0009535	9.53663e-06	0.00447983	6	29	chloroplast thylakoid membrane	cellular_component	XLOC_009133, XLOC_016679, XLOC_019823, XLOC_034214, XLOC_034334, XLOC_042521
2VS5	Down	GO:0008610	1.47753e-05	0.00555255	6	35	lipid biosynthetic process	biological_process	Glyma.02G001500, Glyma.06G058500, Glyma.10G274400, Glyma.12G075100, Glyma.20G115500, Glyma.20G240900
2VS5	Down	GO:0006633	6.75532e-05	0.0211554	7	64	fatty acid biosynthetic process	biological_process	Glyma.02G001500, Glyma.06G058500, Glyma.06G118500, Glyma.10G274400, Glyma.12G075100, Glyma.20G115500, Glyma.20G240900
2VS5	Down	GO:0009765	0.000293193	0.0787014	5	34	photosynthesis, light harvesting	biological_process	Glyma.06G194900, Glyma.08G074000, Glyma.13G282000, Glyma.15G179400, Glyma.20G212900
2VS5	Down	GO:0009772	0.000825003	0.193773	3	11	photosynthetic electron transport in photosystem II	biological_process	Glyma.06G217900, XLOC_019823, XLOC_034334
2VS5	Down	GO:0042132	0.00102921	0.214876	3	12	fructose 1,6-bisphosphate 1-phosphatase activity	molecular_function	Glyma.07G142700, Glyma.10G225400, Glyma.18G193600
2VS5	Down	GO:0016168	0.00139283	0.261713	3	13	chlorophyll binding	molecular_function	XLOC_009133, XLOC_019823, XLOC_034334
2VS5	Down	GO:0018298	0.00222521	0.380106	3	18	protein-chromophore linkage	biological_process	XLOC_009133, XLOC_019823, XLOC_034334
2VS5	Down	GO:0009579	0.00267354	0.400391	2	5	thylakoid	cellular_component	Glyma.09G090100, Glyma.U016600
2VS5	Down	GO:0008152	0.00277013	0.400391	19	583	metabolic process	biological_process	Glyma.01G113200, Glyma.02G002000, Glyma.04G109400, Glyma.04G115300, Glyma.04G243000, Glyma.06G247100, Glyma.06G283600, Glyma.07G268500, Glyma.09G135700, Glyma.09G248400, Glyma.11G120600, Glyma.12G009200, Glyma.12G122700, Glyma.15G140200, Glyma.17G176200, Glyma.18G225000, Glyma.18G265700, Glyma.19G036100, Glyma.19G079000
2VS5	Down	GO:0010207	0.00300394	0.403171	2	5	photosystem II assembly	biological_process	Glyma.12G200200, Glyma.13G302100
2VS5	Down	GO:0045156	0.00450773	0.564669	2	6	electron transporter, transferring electrons within the cyclic electron transport pathway of photosynthesis activity	molecular_function	XLOC_019823, XLOC_034334
2VS5	Down	GO:0009654	0.00505052	0.59312	4	40	photosystem II oxygen evolving complex	cellular_component	Glyma.04G241000, Glyma.08G304200, Glyma.10G290700, Glyma.18G046700
2VS5	Down	GO:0016705	0.00803194	0.887765	11	293	oxidoreductase activity, acting on paired donors, with incorporation or reduction of molecular oxygen	molecular_function	Glyma.02G119600, Glyma.02G256800, Glyma.03G030900, Glyma.05G021900, Glyma.08G109900, Glyma.10G202400, Glyma.11G060100, Glyma.14G117200, Glyma.18G028300, Glyma.18G272300, Glyma.20G007200
2VS5	Down	GO:0006468	0.00892873	0.93206	13	520	protein phosphorylation	biological_process	Glyma.02G097400, Glyma.04G139100, Glyma.05G126400, Glyma.06G124200, Glyma.06G257500, Glyma.06G261900, Glyma.06G262400, Glyma.08G061000, Glyma.08G066000, Glyma.12G140200, Glyma.15G021300, Glyma.15G227000, Glyma.16G065700
2VS5	Down	GO:0006073	0.0101729	0.963297	4	49	cellular glucan metabolic process	biological_process	Glyma.05G109600, Glyma.10G251700, Glyma.17G157400, Glyma.18G165700
2VS5	Down	GO:0016762	0.0109267	0.963297	4	50	xyloglucan:xyloglucosyl transferase activity	molecular_function	Glyma.05G109600, Glyma.10G251700, Glyma.17G157400, Glyma.18G165700
2VS5	Down	GO:0008289	0.0111868	0.963297	3	38	lipid binding	molecular_function	Glyma.07G076800, Glyma.12G194400, Glyma.13G308200
2VS5	Down	GO:0005506	0.0112786	0.963297	12	347	iron ion binding	molecular_function	Glyma.02G119600, Glyma.02G256800, Glyma.03G030900, Glyma.05G021900, Glyma.08G109900, Glyma.10G202400, Glyma.11G060100, Glyma.14G117200, Glyma.18G028300, Glyma.18G272300, Glyma.20G007200, XLOC_034334
2VS5	Down	GO:0006090	0.0123152	0.964176	1	2	pyruvate metabolic process	biological_process	Glyma.07G253700
2VS5	Down	GO:0050242	0.0123152	0.964176	1	2	pyruvate, phosphate dikinase activity	molecular_function	Glyma.07G253700
2VS5	Down	GO:0019684	0.012903	0.96979	2	10	photosynthesis, light reaction	biological_process	Glyma.06G217900, XLOC_042521
2VS5	Down	GO:0005215	0.0141654	1	9	244	transporter activity	molecular_function	Glyma.01G081700, Glyma.03G227500, Glyma.10G005300, Glyma.13G167700, Glyma.17G115300, Glyma.17G139400, Glyma.19G181300, Glyma.19G224400, Glyma.20G247400
2VS5	Down	GO:0016310	0.0169283	1	1	3	phosphorylation	biological_process	Glyma.07G253700
2VS5	Down	GO:0004805	0.0170718	1	1	1	trehalose-phosphatase activity	molecular_function	XLOC_045925
2VS5	Down	GO:0030955	0.0171939	1	1	1	potassium ion binding	molecular_function	XLOC_009630
2VS5	Down	GO:0010468	0.0177793	1	1	1	regulation of gene expression	biological_process	XLOC_040788
2VS5	Down	GO:0045017	0.0177849	1	1	1	glycerolipid biosynthetic process	biological_process	Glyma.12G114900
2VS5	Down	GO:0046933	0.0194745	1	2	14	proton-transporting ATP synthase activity, rotational mechanism	molecular_function	XLOC_016679, XLOC_034214
2VS5	Down	GO:0009507	0.0195447	1	5	90	chloroplast	cellular_component	Glyma.02G141700, Glyma.12G178800, XLOC_009133, XLOC_014132, XLOC_016679
2VS5	Down	GO:0009538	0.0211411	1	2	13	photosystem I reaction center	cellular_component	Glyma.07G019700, Glyma.13G129500
2VS5	Down	GO:0071949	0.0245093	1	1	2	FAD binding	molecular_function	Glyma.17G174500
2VS5	Down	GO:0004672	0.0264296	1	34	1827	protein kinase activity	molecular_function	Glyma.01G013500, Glyma.02G097400, Glyma.04G139100, Glyma.05G002600, Glyma.05G037200, Glyma.05G100000, Glyma.05G126400, Glyma.06G124200, Glyma.06G257500, Glyma.06G261900, Glyma.06G262400, Glyma.07G082600, Glyma.07G270700, Glyma.08G061000, Glyma.08G066000, Glyma.08G083000, Glyma.09G014900, Glyma.11G204500, Glyma.11G230400, Glyma.12G140200, Glyma.13G212600, Glyma.14G011500, Glyma.14G189100, Glyma.15…
2VS5	Down	GO:0004553	0.02849	1	11	365	hydrolase activity, hydrolyzing O-glycosyl compounds	molecular_function	Glyma.05G109600, Glyma.10G017000, Glyma.10G251700, Glyma.11G130100, Glyma.12G021300, Glyma.13G218300, Glyma.13G278600, Glyma.17G157400, Glyma.17G252400, Glyma.18G165700, Glyma.19G223000
2VS5	Down	GO:0004185	0.028639	1	4	69	serine-type carboxypeptidase activity	molecular_function	Glyma.02G204700, Glyma.06G165400, Glyma.13G029200, Glyma.15G156200
2VS5	Down	GO:0005992	0.0322339	1	1	2	trehalose biosynthetic process	biological_process	XLOC_045925
2VS5	Down	GO:0009635	0.0352558	1	1	2	response to herbicide	biological_process	XLOC_034334
2VS5	Down	GO:0010242	0.0352558	1	1	2	oxygen evolving activity	molecular_function	XLOC_034334
2VS5	Down	GO:0045263	0.0352558	1	1	2	proton-transporting ATP synthase complex, coupling factor F(o)	cellular_component	XLOC_034214
2VS5	Down	GO:0046912	0.0419375	1	1	3	transferase activity, transferring acyl groups, acyl groups converted into alkyl on transfer	molecular_function	Glyma.15G140200
2VS5	Down	GO:0005975	0.0426862	1	7	212	carbohydrate metabolic process	biological_process	Glyma.05G109600, Glyma.07G142700, Glyma.10G225400, Glyma.10G251700, Glyma.17G157400, Glyma.18G165700, Glyma.18G193600
2VS5	Down	GO:0016702	0.0436142	1	3	56	oxidoreductase activity, acting on single donors with incorporation of molecular oxygen, incorporation of two atoms of oxygen	molecular_function	Glyma.11G130200, Glyma.11G130300, Glyma.20G054000
2VS5	Down	GO:0015986	0.0452276	1	2	21	ATP synthesis coupled proton transport	biological_process	XLOC_016679, XLOC_034214
2VS5	Down	GO:0046872	0.0455945	1	6	173	metal ion binding	molecular_function	Glyma.11G130200, Glyma.11G130300, Glyma.12G178800, Glyma.20G054000, XLOC_009133, XLOC_019823
2VS5	Up	GO:0020037	3.25724e-09	6.12036e-06	27	455	heme binding	molecular_function	Glyma.01G130800, Glyma.02G233800, Glyma.02G298800, Glyma.03G160300, Glyma.03G226800, Glyma.05G170400, Glyma.05G220500, Glyma.08G193900, Glyma.09G022300, Glyma.09G057100, Glyma.09G279100, Glyma.09G284400, Glyma.10G009400, Glyma.10G191700, Glyma.10G234700, Glyma.11G062700, Glyma.13G306900, Glyma.15G156100, Glyma.15G243300, Glyma.16G055900, Glyma.17G125400, Glyma.19G003600, Glyma.19G014600, Glyma.20…
2VS5	Up	GO:0016705	5.10024e-06	0.00479167	17	293	oxidoreductase activity, acting on paired donors, with incorporation or reduction of molecular oxygen	molecular_function	Glyma.02G298800, Glyma.03G160300, Glyma.03G226800, Glyma.05G170400, Glyma.05G220500, Glyma.08G193900, Glyma.09G279100, Glyma.10G234700, Glyma.11G062700, Glyma.15G156100, Glyma.15G243300, Glyma.17G125400, Glyma.19G003600, Glyma.19G014600, Glyma.20G147900, Glyma.20G159700, Glyma.U000100
2VS5	Up	GO:0005506	3.57459e-05	0.018006	17	347	iron ion binding	molecular_function	Glyma.02G298800, Glyma.03G160300, Glyma.03G226800, Glyma.05G170400, Glyma.05G220500, Glyma.08G193900, Glyma.09G279100, Glyma.10G234700, Glyma.11G062700, Glyma.15G156100, Glyma.15G243300, Glyma.17G125400, Glyma.19G003600, Glyma.19G014600, Glyma.20G147900, Glyma.20G159700, Glyma.U000100
2VS5	Up	GO:0006855	3.83311e-05	0.018006	8	79	drug transmembrane transport	biological_process	Glyma.09G102800, Glyma.09G146800, Glyma.10G239000, Glyma.15G274600, Glyma.17G136400, Glyma.17G136500, Glyma.20G123400, XLOC_038793
2VS5	Up	GO:0004601	5.19429e-05	0.0195201	11	164	peroxidase activity	molecular_function	Glyma.01G130800, Glyma.02G233800, Glyma.09G022300, Glyma.09G057100, Glyma.09G284400, Glyma.10G009400, Glyma.10G191700, Glyma.13G306900, Glyma.16G055900, Glyma.20G029600, Glyma.20G214200
2VS5	Up	GO:0015238	0.000253222	0.0724314	7	79	drug transmembrane transporter activity	molecular_function	Glyma.09G102800, Glyma.09G146800, Glyma.10G239000, Glyma.15G274600, Glyma.17G136400, Glyma.17G136500, Glyma.20G123400
2VS5	Up	GO:0015297	0.000285006	0.0724314	7	81	antiporter activity	molecular_function	Glyma.09G102800, Glyma.09G146800, Glyma.10G239000, Glyma.15G274600, Glyma.17G136400, Glyma.17G136500, Glyma.20G123400
2VS5	Up	GO:0016702	0.000308383	0.0724314	6	56	oxidoreductase activity, acting on single donors with incorporation of molecular oxygen, incorporation of two atoms of oxygen	molecular_function	Glyma.02G208600, Glyma.07G196800, Glyma.08G189200, Glyma.08G189500, Glyma.08G189600, Glyma.16G037600
2VS5	Up	GO:0006979	0.000439621	0.0917831	10	178	response to oxidative stress	biological_process	Glyma.01G130800, Glyma.02G233800, Glyma.09G022300, Glyma.09G057100, Glyma.09G284400, Glyma.10G009400, Glyma.10G191700, Glyma.13G306900, Glyma.16G055900, Glyma.20G214200
2VS5	Up	GO:0016020	0.00181625	0.341273	22	690	membrane	cellular_component	Glyma.03G168000, Glyma.06G112100, Glyma.06G149500, Glyma.06G324300, Glyma.08G180400, Glyma.09G019600, Glyma.09G102800, Glyma.09G146800, Glyma.10G239000, Glyma.12G191500, Glyma.13G004400, Glyma.13G227100, Glyma.14G148300, Glyma.15G274600, Glyma.16G077000, Glyma.16G218100, Glyma.17G136400, Glyma.17G136500, Glyma.17G148600, Glyma.18G133500, Glyma.20G123400, XLOC_038793
2VS5	Up	GO:0003700	0.00961604	1	23	840	transcription factor activity, sequence-specific DNA binding	molecular_function	Glyma.01G195900, Glyma.01G232000, Glyma.03G128200, Glyma.03G135800, Glyma.03G142400, Glyma.03G162500, Glyma.04G173500, Glyma.04G254800, Glyma.05G033400, Glyma.05G108600, Glyma.07G156200, Glyma.08G011300, Glyma.08G320200, Glyma.09G231600, Glyma.10G029600, Glyma.10G092100, Glyma.11G047700, Glyma.13G122800, Glyma.13G227100, Glyma.17G097900, Glyma.18G117100, Glyma.19G163800, XLOC_028335
2VS5	Up	GO:0015074	0.0132842	1	6	169	DNA integration	biological_process	XLOC_016623, XLOC_030628, XLOC_032015, XLOC_038535, XLOC_040846, XLOC_047545
2VS5	Up	GO:0003825	0.0177727	1	1	1	alpha,alpha-trehalose-phosphate synthase (UDP-forming) activity	molecular_function	XLOC_038060
2VS5	Up	GO:0010154	0.0177727	1	1	1	fruit development	biological_process	XLOC_028354
2VS5	Up	GO:0032441	0.0177727	1	1	1	pheophorbide a oxygenase activity	molecular_function	XLOC_028354
2VS5	Up	GO:0008559	0.0177727	1	1	1	xenobiotic-transporting ATPase activity	molecular_function	XLOC_038793
2VS5	Up	GO:0042908	0.0177727	1	1	1	xenobiotic transport	biological_process	XLOC_038793
2VS5	Up	GO:0042335	0.0177727	1	1	1	cuticle development	biological_process	XLOC_028335
2VS5	Up	GO:0009308	0.0182094	1	2	14	amine metabolic process	biological_process	Glyma.17G019300, Glyma.20G145100
2VS5	Up	GO:0022857	0.0192995	1	6	134	transmembrane transporter activity	molecular_function	Glyma.04G171800, Glyma.06G112100, Glyma.06G149500, Glyma.13G227100, Glyma.14G148300, Glyma.16G077000
2VS5	Up	GO:0008131	0.0201559	1	2	15	primary amine oxidase activity	molecular_function	Glyma.17G019300, Glyma.20G145100
2VS5	Up	GO:0015299	0.0222221	1	3	37	solute:proton antiporter activity	molecular_function	Glyma.04G212200, Glyma.06G154200, Glyma.07G251900
2VS5	Up	GO:0006812	0.0224289	1	4	66	cation transport	biological_process	Glyma.04G212200, Glyma.06G154200, Glyma.07G251900, Glyma.09G099500
2VS5	Up	GO:0055114	0.024571	1	5	99	oxidation-reduction process	biological_process	Glyma.07G196800, Glyma.08G189200, Glyma.08G189500, Glyma.08G189600, Glyma.13G372200
2VS5	Up	GO:0048767	0.0280326	1	1	2	root hair elongation	biological_process	XLOC_038793
2VS5	Up	GO:0004553	0.0299707	1	11	365	hydrolase activity, hydrolyzing O-glycosyl compounds	molecular_function	Glyma.01G165000, Glyma.07G151800, Glyma.11G073100, Glyma.12G053800, Glyma.12G053900, Glyma.12G054300, Glyma.12G240000, Glyma.14G091300, Glyma.16G039300, Glyma.18G120700, Glyma.20G061100
2VS5	Up	GO:0048038	0.0314425	1	2	26	quinone binding	molecular_function	Glyma.17G019300, Glyma.20G145100
2VS5	Up	GO:0016491	0.0324372	1	18	699	oxidoreductase activity	molecular_function	Glyma.02G010100, Glyma.04G121700, Glyma.05G124800, Glyma.08G039300, Glyma.08G169300, Glyma.08G169700, Glyma.08G169900, Glyma.08G351900, Glyma.09G161600, Glyma.10G010700, Glyma.11G035300, Glyma.13G036200, Glyma.15G223900, Glyma.16G153400, Glyma.17G049900, Glyma.17G054600, Glyma.19G008600, Glyma.19G188100
2VS5	Up	GO:0009816	0.0339454	1	1	3	defense response to bacterium, incompatible interaction	biological_process	XLOC_028354
2VS5	Up	GO:0005992	0.0351848	1	1	2	trehalose biosynthetic process	biological_process	XLOC_038060
2VS5	Up	GO:0048765	0.0352306	1	1	2	root hair cell differentiation	biological_process	XLOC_028335
2VS5	Up	GO:0016021	0.0388207	1	18	743	integral component of membrane	cellular_component	Glyma.04G027300, Glyma.04G102600, Glyma.04G102700, Glyma.04G171800, Glyma.04G212200, Glyma.06G103900, Glyma.06G154200, Glyma.07G251900, Glyma.09G099500, Glyma.09G176300, Glyma.11G195200, Glyma.12G176900, Glyma.13G118800, Glyma.13G118900, Glyma.13G227100, Glyma.13G323800, Glyma.18G141900, XLOC_038793
2VS5	Up	GO:0009630	0.0391008	1	1	3	gravitropism	biological_process	XLOC_038793
2VS5	Up	GO:0003964	0.0395822	1	3	55	RNA-directed DNA polymerase activity	molecular_function	XLOC_016623, XLOC_019789, XLOC_040846
2VS5	Up	GO:0005215	0.0425076	1	8	244	transporter activity	molecular_function	Glyma.02G073700, Glyma.05G162500, Glyma.08G203000, Glyma.10G005400, Glyma.10G221100, Glyma.11G224100, Glyma.18G133500, Glyma.20G170400
2VS5	Up	GO:0006810	0.0445614	1	11	380	transport	biological_process	Glyma.02G073700, Glyma.05G162500, Glyma.08G203000, Glyma.10G005400, Glyma.10G221100, Glyma.11G224100, Glyma.13G118800, Glyma.13G118900, Glyma.17G148600, Glyma.18G133500, Glyma.20G170400
2VS5	Up	GO:0004650	0.0455814	1	2	25	polygalacturonase activity	molecular_function	Glyma.09G224800, Glyma.15G275400
2VS5	Up	GO:0012511	0.0472414	1	1	3	monolayer-surrounded lipid storage body	cellular_component	Glyma.17G122000
2VS5	Up	GO:0010328	0.0488699	1	1	3	auxin influx transmembrane transporter activity	molecular_function	XLOC_038793
2VS5	Up	GO:0010540	0.0488699	1	1	3	basipetal auxin transport	biological_process	XLOC_038793
2VS5	Up	GO:0010541	0.0488699	1	1	3	acropetal auxin transport	biological_process	XLOC_038793
2VS5	Up	GO:0060919	0.0488699	1	1	3	auxin influx	biological_process	XLOC_038793
2VS6	Down	GO:0009522	5.63301e-08	9.07606e-05	8	33	photosystem I	cellular_component	Glyma.07G019700, Glyma.08G204800, Glyma.09G090100, Glyma.10G256000, Glyma.13G357300, Glyma.20G144700, Glyma.U016600, XLOC_009133
2VS6	Down	GO:0015979	9.66052e-08	9.07606e-05	12	87	photosynthesis	biological_process	Glyma.05G172300, Glyma.06G073600, Glyma.08G304200, Glyma.09G073900, Glyma.09G090100, Glyma.10G256000, Glyma.10G290700, Glyma.13G232500, Glyma.15G253700, Glyma.18G046700, Glyma.U016600, XLOC_009133
2VS6	Down	GO:0009535	3.29907e-05	0.0170078	5	29	chloroplast thylakoid membrane	cellular_component	XLOC_009133, XLOC_016679, XLOC_019823, XLOC_034214, XLOC_042521
2VS6	Down	GO:0009523	3.6206e-05	0.0170078	8	66	photosystem II	cellular_component	Glyma.05G172300, Glyma.06G073600, Glyma.08G304200, Glyma.09G073900, Glyma.10G290700, Glyma.15G253700, Glyma.18G046700, XLOC_019823
2VS6	Down	GO:0009765	8.43531e-05	0.0316999	6	34	photosynthesis, light harvesting	biological_process	Glyma.02G305400, Glyma.07G047600, Glyma.13G282000, Glyma.15G052400, Glyma.15G179400, Glyma.20G212900
2VS6	Down	GO:0009538	0.000106445	0.0333349	4	13	photosystem I reaction center	cellular_component	Glyma.07G019700, Glyma.08G204800, Glyma.13G357300, Glyma.20G144700
2VS6	Down	GO:0019684	0.000217597	0.0584092	3	10	photosynthesis, light reaction	biological_process	Glyma.04G095000, Glyma.06G217900, XLOC_042521
2VS6	Down	GO:0008152	0.000291475	0.0628956	27	583	metabolic process	biological_process	Glyma.01G113200, Glyma.02G096600, Glyma.04G029000, Glyma.04G109400, Glyma.04G115300, Glyma.04G243000, Glyma.06G247100, Glyma.06G283600, Glyma.07G082100, Glyma.07G268500, Glyma.08G121900, Glyma.09G135700, Glyma.10G281400, Glyma.11G120600, Glyma.12G122700, Glyma.13G183200, Glyma.15G140200, Glyma.15G157700, Glyma.16G175200, Glyma.17G176200, Glyma.18G225000, Glyma.18G265700, Glyma.18G284700, Glyma.19…
2VS6	Down	GO:0009772	0.000301256	0.0628956	3	11	photosynthetic electron transport in photosystem II	biological_process	Glyma.04G095000, Glyma.06G217900, XLOC_019823
2VS6	Down	GO:0006633	0.000404039	0.075919	7	64	fatty acid biosynthetic process	biological_process	Glyma.06G058500, Glyma.06G118500, Glyma.10G274400, Glyma.12G075100, Glyma.17G069100, Glyma.20G115500, Glyma.20G240900
2VS6	Down	GO:0016168	0.000574168	0.0980783	3	13	chlorophyll binding	molecular_function	Glyma.08G281300, XLOC_009133, XLOC_019823
2VS6	Down	GO:0008610	0.00095323	0.14926	5	35	lipid biosynthetic process	biological_process	Glyma.06G058500, Glyma.10G274400, Glyma.12G075100, Glyma.20G115500, Glyma.20G240900
2VS6	Down	GO:0009654	0.00150463	0.217477	5	40	photosystem II oxygen evolving complex	cellular_component	Glyma.06G073600, Glyma.08G304200, Glyma.10G290700, Glyma.15G253700, Glyma.18G046700
2VS6	Down	GO:0046933	0.00181173	0.24316	3	14	proton-transporting ATP synthase activity, rotational mechanism	molecular_function	Glyma.02G184000, XLOC_016679, XLOC_034214
2VS6	Down	GO:0009579	0.00194631	0.243808	2	5	thylakoid	cellular_component	Glyma.09G090100, Glyma.U016600
2VS6	Down	GO:0004332	0.00284029	0.333556	3	13	fructose-bisphosphate aldolase activity	molecular_function	Glyma.11G111100, Glyma.11G111400, Glyma.12G037400
2VS6	Down	GO:0015986	0.00649574	0.671174	3	21	ATP synthesis coupled proton transport	biological_process	Glyma.02G184000, XLOC_016679, XLOC_034214
2VS6	Down	GO:0004564	0.00661778	0.671174	2	6	beta-fructofuranosidase activity	molecular_function	Glyma.05G056300, Glyma.17G138500
2VS6	Down	GO:0004061	0.00690262	0.671174	2	6	arylformamidase activity	molecular_function	Glyma.10G263400, Glyma.20G126800
2VS6	Down	GO:0015996	0.00714395	0.671174	2	6	chlorophyll catabolic process	biological_process	Glyma.07G096900, Glyma.10G003200
2VS6	Down	GO:0008289	0.00863466	0.751946	4	38	lipid binding	molecular_function	Glyma.03G016600, Glyma.07G076800, Glyma.12G194400, Glyma.13G308200
2VS6	Down	GO:0022857	0.00880405	0.751946	8	134	transmembrane transporter activity	molecular_function	Glyma.01G033900, Glyma.04G240000, Glyma.04G240100, Glyma.04G250600, Glyma.08G098400, Glyma.09G087200, Glyma.11G066500, Glyma.20G246300
2VS6	Down	GO:0016620	0.00922861	0.753937	3	20	oxidoreductase activity, acting on the aldehyde or oxo group of donors, NAD or NADP as acceptor	molecular_function	Glyma.04G015900, Glyma.16G044900, Glyma.19G106800
2VS6	Down	GO:0016705	0.0128636	1	13	293	oxidoreductase activity, acting on paired donors, with incorporation or reduction of molecular oxygen	molecular_function	Glyma.02G119600, Glyma.02G256800, Glyma.03G030900, Glyma.08G109900, Glyma.10G202400, Glyma.11G060100, Glyma.14G117200, Glyma.18G272300, Glyma.19G015000, Glyma.19G258700, Glyma.20G007200, Glyma.20G018600, Glyma.20G188000
2VS6	Down	GO:0009507	0.0162161	1	5	90	chloroplast	cellular_component	Glyma.12G178800, XLOC_009133, XLOC_014132, XLOC_014230, XLOC_016679
2VS6	Down	GO:0004185	0.0163413	1	5	69	serine-type carboxypeptidase activity	molecular_function	Glyma.02G204700, Glyma.06G047400, Glyma.13G029200, Glyma.15G156200, Glyma.18G266700
2VS6	Down	GO:0004097	0.0172646	1	2	9	catechol oxidase activity	molecular_function	Glyma.13G183200, Glyma.18G225000
2VS6	Down	GO:0045261	0.018078	1	2	11	proton-transporting ATP synthase complex, catalytic core F(1)	cellular_component	Glyma.02G184000, XLOC_016679
2VS6	Down	GO:0016020	0.0185826	1	24	690	membrane	cellular_component	Glyma.01G033900, Glyma.01G058600, Glyma.04G240000, Glyma.04G240100, Glyma.04G250600, Glyma.06G058500, Glyma.06G106200, Glyma.06G118500, Glyma.08G050500, Glyma.08G241600, Glyma.08G281300, Glyma.08G282600, Glyma.09G160000, Glyma.10G274400, Glyma.12G020400, Glyma.12G075100, Glyma.12G133700, Glyma.12G170500, Glyma.13G275400, Glyma.15G236100, Glyma.18G019000, Glyma.19G202200, Glyma.20G115500, Glyma.20…
2VS6	Down	GO:0005215	0.0189241	1	11	244	transporter activity	molecular_function	Glyma.01G081700, Glyma.03G227500, Glyma.08G328400, Glyma.10G005300, Glyma.10G296600, Glyma.13G167700, Glyma.15G236100, Glyma.17G096400, Glyma.17G115300, Glyma.18G299200, Glyma.20G247400
2VS6	Down	GO:0005506	0.0192006	1	14	347	iron ion binding	molecular_function	Glyma.02G119600, Glyma.02G256800, Glyma.03G030900, Glyma.08G109900, Glyma.10G202400, Glyma.11G060100, Glyma.14G117200, Glyma.17G069100, Glyma.18G272300, Glyma.19G015000, Glyma.19G258700, Glyma.20G007200, Glyma.20G018600, Glyma.20G188000
2VS6	Down	GO:0045263	0.0202561	1	1	2	proton-transporting ATP synthase complex, coupling factor F(o)	cellular_component	XLOC_034214
2VS6	Down	GO:0045017	0.0215993	1	1	1	glycerolipid biosynthetic process	biological_process	Glyma.12G114900
2VS6	Down	GO:0010468	0.0220992	1	1	1	regulation of gene expression	biological_process	XLOC_040788
2VS6	Down	GO:0030955	0.0235773	1	1	1	potassium ion binding	molecular_function	XLOC_009630
2VS6	Down	GO:0004805	0.0236048	1	1	1	trehalose-phosphatase activity	molecular_function	XLOC_045925
2VS6	Down	GO:0042132	0.0283037	1	2	12	fructose 1,6-bisphosphate 1-phosphatase activity	molecular_function	Glyma.07G142700, Glyma.18G193600
2VS6	Down	GO:0016021	0.028893	1	24	743	integral component of membrane	cellular_component	Glyma.02G164400, Glyma.03G014000, Glyma.03G241000, Glyma.05G172300, Glyma.06G317100, Glyma.08G098400, Glyma.09G087200, Glyma.11G066500, Glyma.11G134700, Glyma.11G175800, Glyma.13G131200, Glyma.15G236100, Glyma.16G036000, Glyma.16G180900, Glyma.18G066000, Glyma.19G185600, Glyma.20G002000, Glyma.20G246300, XLOC_000412, XLOC_009133, XLOC_019823, XLOC_029769, XLOC_034214, XLOC_042521
2VS6	Down	GO:0018298	0.037829	1	2	18	protein-chromophore linkage	biological_process	XLOC_009133, XLOC_019823
2VS6	Down	GO:0009058	0.0406355	1	6	114	biosynthetic process	biological_process	Glyma.07G258500, Glyma.08G269600, Glyma.09G070500, Glyma.11G028200, Glyma.13G001200, Glyma.17G015600
2VS6	Down	GO:0008360	0.041416	1	1	2	regulation of cell shape	biological_process	XLOC_029769
2VS6	Down	GO:0000175	0.0445843	1	1	2	3'-5'-exoribonuclease activity	molecular_function	Glyma.19G005800
2VS6	Down	GO:0004077	0.0446049	1	1	2	biotin-[acetyl-CoA-carboxylase] ligase activity	molecular_function	Glyma.06G109600
2VS6	Down	GO:0005992	0.0466983	1	1	2	trehalose biosynthetic process	biological_process	XLOC_045925
2VS6	Down	GO:0071949	0.0467427	1	1	2	FAD binding	molecular_function	Glyma.17G174500
2VS6	Down	GO:0043231	0.048495	1	1	3	intracellular membrane-bounded organelle	cellular_component	Glyma.09G152100
2VS6	Down	GO:0006508	0.0495441	1	9	211	proteolysis	biological_process	Glyma.02G215700, Glyma.05G007200, Glyma.05G132000, Glyma.07G205400, Glyma.14G085600, Glyma.16G144700, Glyma.19G007800, Glyma.19G045800, Glyma.19G196700
2VS6	Up	GO:0004601	9.64613e-07	0.00129755	13	164	peroxidase activity	molecular_function	Glyma.02G233800, Glyma.06G221700, Glyma.07G130800, Glyma.08G181500, Glyma.09G022300, Glyma.09G057100, Glyma.09G284400, Glyma.10G009400, Glyma.10G191700, Glyma.16G055900, Glyma.18G055500, Glyma.20G029600, Glyma.20G214200
2VS6	Up	GO:0020037	1.38111e-06	0.00129755	22	455	heme binding	molecular_function	Glyma.02G233800, Glyma.02G298800, Glyma.03G226800, Glyma.05G170400, Glyma.05G220500, Glyma.06G221700, Glyma.08G181500, Glyma.08G193900, Glyma.09G022300, Glyma.09G057100, Glyma.09G284400, Glyma.10G009400, Glyma.10G191700, Glyma.10G234700, Glyma.11G062700, Glyma.16G055900, Glyma.17G125400, Glyma.18G055500, Glyma.18G297200, Glyma.19G003600, Glyma.19G014600, Glyma.20G214200
2VS6	Up	GO:0015238	2.42259e-05	0.0104739	8	79	drug transmembrane transporter activity	molecular_function	Glyma.02G090100, Glyma.05G054100, Glyma.09G102800, Glyma.09G146800, Glyma.10G239000, Glyma.15G274600, Glyma.17G136400, Glyma.17G136500
2VS6	Up	GO:0006855	2.64419e-05	0.0104739	8	79	drug transmembrane transport	biological_process	Glyma.02G090100, Glyma.05G054100, Glyma.09G102800, Glyma.09G146800, Glyma.10G239000, Glyma.15G274600, Glyma.17G136400, Glyma.17G136500
2VS6	Up	GO:0015297	2.78709e-05	0.0104739	8	81	antiporter activity	molecular_function	Glyma.02G090100, Glyma.05G054100, Glyma.09G102800, Glyma.09G146800, Glyma.10G239000, Glyma.15G274600, Glyma.17G136400, Glyma.17G136500
2VS6	Up	GO:0006979	6.22693e-05	0.0195007	11	178	response to oxidative stress	biological_process	Glyma.02G233800, Glyma.06G221700, Glyma.08G181500, Glyma.09G022300, Glyma.09G057100, Glyma.09G284400, Glyma.10G009400, Glyma.10G191700, Glyma.16G055900, Glyma.18G055500, Glyma.20G214200
2VS6	Up	GO:0016702	0.0017967	0.482285	5	56	oxidoreductase activity, acting on single donors with incorporation of molecular oxygen, incorporation of two atoms of oxygen	molecular_function	Glyma.02G208600, Glyma.07G196800, Glyma.08G189200, Glyma.08G189500, Glyma.16G037600
2VS6	Up	GO:0003700	0.00254883	0.598655	24	840	transcription factor activity, sequence-specific DNA binding	molecular_function	Glyma.01G020500, Glyma.01G195900, Glyma.01G232000, Glyma.02G006200, Glyma.03G128200, Glyma.03G135800, Glyma.03G142400, Glyma.03G162500, Glyma.04G173500, Glyma.04G254800, Glyma.05G033400, Glyma.07G156200, Glyma.08G011300, Glyma.08G320200, Glyma.09G231600, Glyma.10G029600, Glyma.10G092100, Glyma.11G047700, Glyma.17G097900, Glyma.17G158300, Glyma.18G117100, Glyma.19G163800, XLOC_002575, XLOC_028335
2VS6	Up	GO:0048364	0.00314551	0.656713	2	6	root development	biological_process	XLOC_025578, XLOC_028335
2VS6	Up	GO:0004867	0.00352071	0.661541	2	10	serine-type endopeptidase inhibitor activity	molecular_function	Glyma.18G231400, Glyma.20G205900
2VS6	Up	GO:0016020	0.00467174	0.760901	20	690	membrane	cellular_component	Glyma.02G090100, Glyma.03G168000, Glyma.03G175300, Glyma.05G054100, Glyma.06G149500, Glyma.09G019600, Glyma.09G102800, Glyma.09G146800, Glyma.10G239000, Glyma.12G191500, Glyma.13G004400, Glyma.13G238600, Glyma.14G148100, Glyma.14G148300, Glyma.15G274600, Glyma.16G218100, Glyma.17G136400, Glyma.17G136500, Glyma.17G148600, Glyma.18G133500
2VS6	Up	GO:0016491	0.00506829	0.760901	20	699	oxidoreductase activity	molecular_function	Glyma.02G010100, Glyma.02G072200, Glyma.05G124800, Glyma.07G130800, Glyma.08G039300, Glyma.08G169700, Glyma.08G169900, Glyma.08G351900, Glyma.09G161600, Glyma.09G189200, Glyma.10G010700, Glyma.11G035300, Glyma.11G050400, Glyma.13G036200, Glyma.13G222100, Glyma.16G153400, Glyma.17G049900, Glyma.17G054600, Glyma.19G008600, Glyma.19G188100
2VS6	Up	GO:0016705	0.00526435	0.760901	11	293	oxidoreductase activity, acting on paired donors, with incorporation or reduction of molecular oxygen	molecular_function	Glyma.02G298800, Glyma.03G226800, Glyma.05G170400, Glyma.05G220500, Glyma.08G193900, Glyma.10G234700, Glyma.11G062700, Glyma.17G125400, Glyma.18G297200, Glyma.19G003600, Glyma.19G014600
2VS6	Up	GO:0005506	0.0151634	1	11	347	iron ion binding	molecular_function	Glyma.02G298800, Glyma.03G226800, Glyma.05G170400, Glyma.05G220500, Glyma.08G193900, Glyma.10G234700, Glyma.11G062700, Glyma.17G125400, Glyma.18G297200, Glyma.19G003600, Glyma.19G014600
2VS6	Up	GO:0008757	0.0166124	1	1	1	S-adenosylmethionine-dependent methyltransferase activity	molecular_function	XLOC_025578
2VS6	Up	GO:0010289	0.0166124	1	1	1	homogalacturonan biosynthetic process	biological_process	XLOC_025578
2VS6	Up	GO:0042335	0.016871	1	1	1	cuticle development	biological_process	XLOC_028335
2VS6	Up	GO:0006351	0.019471	1	6	142	transcription, DNA-templated	biological_process	Glyma.03G128200, Glyma.03G142400, Glyma.04G254800, Glyma.10G092100, XLOC_002575, XLOC_028335
2VS6	Up	GO:0043565	0.0199493	1	3	38	sequence-specific DNA binding	molecular_function	Glyma.11G047700, XLOC_002575, XLOC_028335
2VS6	Up	GO:0043531	0.0241543	1	6	152	ADP binding	molecular_function	Glyma.03G054100, Glyma.12G218500, Glyma.12G239700, Glyma.14G048600, Glyma.16G118600, XLOC_037205
2VS6	Up	GO:0009626	0.0274098	1	1	2	plant-type hypersensitive response	biological_process	XLOC_037205
2VS6	Up	GO:0050664	0.0304035	1	2	17	oxidoreductase activity, acting on NAD(P)H, oxygen as acceptor	molecular_function	Glyma.07G130800, Glyma.20G029600
2VS6	Up	GO:0048765	0.0334585	1	1	2	root hair cell differentiation	biological_process	XLOC_028335
2VS6	Up	GO:0015074	0.0373603	1	5	169	DNA integration	biological_process	XLOC_030628, XLOC_032015, XLOC_038535, XLOC_038768, XLOC_047545
2VS6	Up	GO:0005802	0.0376171	1	1	3	trans-Golgi network	cellular_component	XLOC_025578
2VS6	Up	GO:0048367	0.0460763	1	1	3	shoot system development	biological_process	XLOC_025578
2VS6	Up	GO:0004659	0.0482405	1	2	22	prenyltransferase activity	molecular_function	Glyma.03G033100, Glyma.10G070300
2VS7	Down	GO:0015979	1.82094e-11	2.36678e-08	14	87	photosynthesis	biological_process	Glyma.04G112800, Glyma.05G172300, Glyma.08G304200, Glyma.09G073900, Glyma.09G087700, Glyma.09G090100, Glyma.10G256000, Glyma.10G290700, Glyma.15G174200, Glyma.15G194300, Glyma.18G046700, Glyma.18G114900, Glyma.U016600, XLOC_009133
2VS7	Down	GO:0009522	2.5192e-11	2.36678e-08	10	33	photosystem I	cellular_component	Glyma.04G112800, Glyma.07G019700, Glyma.08G204800, Glyma.09G087700, Glyma.09G090100, Glyma.10G256000, Glyma.13G129500, Glyma.15G194300, Glyma.U016600, XLOC_009133
2VS7	Down	GO:0009765	2.31014e-08	1.44691e-05	8	34	photosynthesis, light harvesting	biological_process	Glyma.02G305400, Glyma.06G194900, Glyma.08G074000, Glyma.13G282000, Glyma.14G003400, Glyma.15G179400, Glyma.16G145800, Glyma.20G212900
2VS7	Down	GO:0009523	4.47205e-07	0.000210075	9	66	photosystem II	cellular_component	Glyma.05G172300, Glyma.08G304200, Glyma.09G073900, Glyma.10G290700, Glyma.15G174200, Glyma.18G046700, Glyma.18G114900, XLOC_019823, XLOC_034334
2VS7	Down	GO:0009772	1.4044e-05	0.00527772	4	11	photosynthetic electron transport in photosystem II	biological_process	Glyma.04G095000, Glyma.06G217900, XLOC_019823, XLOC_034334
2VS7	Down	GO:0008610	7.93795e-05	0.024859	5	35	lipid biosynthetic process	biological_process	Glyma.04G057800, Glyma.06G058500, Glyma.12G075100, Glyma.20G115500, Glyma.20G240900
2VS7	Down	GO:0006633	0.000191523	0.0514102	6	64	fatty acid biosynthetic process	biological_process	Glyma.04G057800, Glyma.06G058500, Glyma.12G075100, Glyma.17G069100, Glyma.20G115500, Glyma.20G240900
2VS7	Down	GO:0042132	0.000598453	0.138951	3	12	fructose 1,6-bisphosphate 1-phosphatase activity	molecular_function	Glyma.07G142700, Glyma.10G225400, Glyma.18G193600
2VS7	Down	GO:0009538	0.00078627	0.138951	3	13	photosystem I reaction center	cellular_component	Glyma.07G019700, Glyma.08G204800, Glyma.13G129500
2VS7	Down	GO:0008152	0.000790707	0.138951	18	583	metabolic process	biological_process	Glyma.01G113200, Glyma.03G014300, Glyma.03G221100, Glyma.04G109400, Glyma.04G243000, Glyma.06G247100, Glyma.09G135700, Glyma.10G281400, Glyma.12G009200, Glyma.12G122700, Glyma.13G183200, Glyma.15G140200, Glyma.17G176200, Glyma.18G225000, Glyma.18G265700, Glyma.19G036100, Glyma.19G079000, Glyma.20G107800
2VS7	Down	GO:0016168	0.000813444	0.138951	3	13	chlorophyll binding	molecular_function	XLOC_009133, XLOC_019823, XLOC_034334
2VS7	Down	GO:0018298	0.0012939	0.202604	3	18	protein-chromophore linkage	biological_process	XLOC_009133, XLOC_019823, XLOC_034334
2VS7	Down	GO:0009579	0.00184546	0.264296	2	5	thylakoid	cellular_component	Glyma.09G090100, Glyma.U016600
2VS7	Down	GO:0010207	0.00208049	0.264296	2	5	photosystem II assembly	biological_process	Glyma.12G200200, Glyma.13G302100
2VS7	Down	GO:0016620	0.00210987	0.264296	3	20	oxidoreductase activity, acting on the aldehyde or oxo group of donors, NAD or NADP as acceptor	molecular_function	Glyma.04G015900, Glyma.06G015900, Glyma.19G106800
2VS7	Down	GO:0009654	0.00259337	0.301441	4	40	photosystem II oxygen evolving complex	cellular_component	Glyma.08G304200, Glyma.10G290700, Glyma.18G046700, Glyma.18G114900
2VS7	Down	GO:0015996	0.00272724	0.301441	2	6	chlorophyll catabolic process	biological_process	Glyma.07G096900, Glyma.10G003200
2VS7	Down	GO:0045156	0.00313019	0.326757	2	6	electron transporter, transferring electrons within the cyclic electron transport pathway of photosynthesis activity	molecular_function	XLOC_019823, XLOC_034334
2VS7	Down	GO:0005215	0.0043544	0.409209	9	244	transporter activity	molecular_function	Glyma.01G081700, Glyma.06G099400, Glyma.08G328400, Glyma.13G167700, Glyma.17G096400, Glyma.17G115300, Glyma.17G139400, Glyma.18G299200, Glyma.20G247400
2VS7	Down	GO:0004097	0.00435561	0.409209	2	9	catechol oxidase activity	molecular_function	Glyma.13G183200, Glyma.18G225000
2VS7	Down	GO:0005506	0.00734141	0.656882	11	347	iron ion binding	molecular_function	Glyma.02G119600, Glyma.05G021900, Glyma.08G109900, Glyma.10G202400, Glyma.14G117200, Glyma.17G069100, Glyma.18G028300, Glyma.20G007200, Glyma.20G018600, Glyma.20G188000, XLOC_034334
2VS7	Down	GO:0009535	0.00852273	0.727918	3	29	chloroplast thylakoid membrane	cellular_component	XLOC_009133, XLOC_019823, XLOC_034334
2VS7	Down	GO:0019684	0.00903176	0.737856	2	10	photosynthesis, light reaction	biological_process	Glyma.04G095000, Glyma.06G217900
2VS7	Down	GO:0010468	0.0147602	1	1	1	regulation of gene expression	biological_process	XLOC_040788
2VS7	Down	GO:0045017	0.014765	1	1	1	glycerolipid biosynthetic process	biological_process	Glyma.12G114900
2VS7	Down	GO:0016705	0.0169124	1	9	293	oxidoreductase activity, acting on paired donors, with incorporation or reduction of molecular oxygen	molecular_function	Glyma.02G119600, Glyma.05G021900, Glyma.08G109900, Glyma.10G202400, Glyma.14G117200, Glyma.18G028300, Glyma.20G007200, Glyma.20G018600, Glyma.20G188000
2VS7	Down	GO:0046422	0.0264542	1	1	2	violaxanthin de-epoxidase activity	molecular_function	Glyma.19G251000
2VS7	Down	GO:0008360	0.0293037	1	1	2	regulation of cell shape	biological_process	XLOC_029769
2VS7	Down	GO:0009635	0.029317	1	1	2	response to herbicide	biological_process	XLOC_034334
2VS7	Down	GO:0010242	0.029317	1	1	2	oxygen evolving activity	molecular_function	XLOC_034334
2VS7	Down	GO:0006468	0.0304908	1	10	520	protein phosphorylation	biological_process	Glyma.04G139100, Glyma.06G257500, Glyma.06G261900, Glyma.06G262400, Glyma.08G061000, Glyma.12G140200, Glyma.15G021300, Glyma.15G227000, Glyma.16G027200, Glyma.16G065700
2VS7	Down	GO:0004970	0.0325912	1	2	31	ionotropic glutamate receptor activity	molecular_function	Glyma.13G233400, Glyma.14G001100
2VS7	Down	GO:0006073	0.0333769	1	3	49	cellular glucan metabolic process	biological_process	Glyma.05G109600, Glyma.17G157400, Glyma.18G165700
2VS7	Down	GO:0046912	0.0346731	1	1	3	transferase activity, transferring acyl groups, acyl groups converted into alkyl on transfer	molecular_function	Glyma.15G140200
2VS7	Down	GO:0016762	0.035182	1	3	50	xyloglucan:xyloglucosyl transferase activity	molecular_function	Glyma.05G109600, Glyma.17G157400, Glyma.18G165700
2VS7	Down	GO:0005509	0.0358619	1	4	92	calcium ion binding	molecular_function	Glyma.08G304200, Glyma.10G290700, Glyma.18G046700, Glyma.18G114900
2VS7	Down	GO:0048544	0.0379823	1	2	30	recognition of pollen	biological_process	Glyma.04G139100, Glyma.08G061000
2VS7	Down	GO:0009507	0.0399334	1	4	90	chloroplast	cellular_component	Glyma.12G178800, Glyma.19G251000, XLOC_009133, XLOC_014132
2VS7	Down	GO:0034599	0.0436368	1	1	3	cellular response to oxidative stress	biological_process	Glyma.12G178800
2VS7	Down	GO:0071486	0.0436368	1	1	3	cellular response to high light intensity	biological_process	Glyma.12G178800
2VS7	Down	GO:0043231	0.043651	1	1	3	intracellular membrane-bounded organelle	cellular_component	Glyma.09G152100
2VS7	Up	GO:0016020	2.07516e-06	0.00389923	26	690	membrane	cellular_component	Glyma.03G168000, Glyma.03G175300, Glyma.04G082700, Glyma.05G054100, Glyma.06G112100, Glyma.06G149500, Glyma.07G101800, Glyma.09G019600, Glyma.09G102800, Glyma.09G146800, Glyma.10G239000, Glyma.12G191500, Glyma.13G004400, Glyma.13G227100, Glyma.13G238600, Glyma.14G148100, Glyma.14G148300, Glyma.15G274600, Glyma.16G218100, Glyma.17G136400, Glyma.17G136500, Glyma.17G148600, Glyma.17G207800, Glyma.18…
2VS7	Up	GO:0015238	9.66283e-06	0.00523678	8	79	drug transmembrane transporter activity	molecular_function	Glyma.05G054100, Glyma.09G102800, Glyma.09G146800, Glyma.10G239000, Glyma.15G274600, Glyma.17G136400, Glyma.17G136500, Glyma.20G123400
2VS7	Up	GO:0006855	1.05539e-05	0.00523678	8	79	drug transmembrane transport	biological_process	Glyma.05G054100, Glyma.09G102800, Glyma.09G146800, Glyma.10G239000, Glyma.15G274600, Glyma.17G136400, Glyma.17G136500, Glyma.20G123400
2VS7	Up	GO:0015297	1.1148e-05	0.00523678	8	81	antiporter activity	molecular_function	Glyma.05G054100, Glyma.09G102800, Glyma.09G146800, Glyma.10G239000, Glyma.15G274600, Glyma.17G136400, Glyma.17G136500, Glyma.20G123400
2VS7	Up	GO:0003700	6.91303e-05	0.0259792	26	840	transcription factor activity, sequence-specific DNA binding	molecular_function	Glyma.01G020500, Glyma.01G195900, Glyma.01G232000, Glyma.03G002300, Glyma.03G128200, Glyma.03G135800, Glyma.03G142400, Glyma.03G162500, Glyma.04G173500, Glyma.05G033400, Glyma.05G105600, Glyma.08G320200, Glyma.09G231600, Glyma.10G067000, Glyma.10G092100, Glyma.11G047700, Glyma.13G081600, Glyma.13G227100, Glyma.14G089200, Glyma.17G097900, Glyma.17G132700, Glyma.17G158300, Glyma.18G052500, Glyma.19…
2VS7	Up	GO:0020037	0.000113069	0.0354093	17	455	heme binding	molecular_function	Glyma.02G233800, Glyma.03G007700, Glyma.03G226800, Glyma.05G220500, Glyma.08G193900, Glyma.09G022300, Glyma.09G057100, Glyma.09G279100, Glyma.10G009400, Glyma.10G203500, Glyma.11G062700, Glyma.17G080500, Glyma.17G125400, Glyma.18G055500, Glyma.18G297200, Glyma.20G147900, Glyma.U000100
2VS7	Up	GO:0004650	0.000175767	0.0471808	4	25	polygalacturonase activity	molecular_function	Glyma.02G009300, Glyma.09G224800, Glyma.10G010000, Glyma.15G275400
2VS7	Up	GO:0016702	0.00102261	0.234672	5	56	oxidoreductase activity, acting on single donors with incorporation of molecular oxygen, incorporation of two atoms of oxygen	molecular_function	Glyma.07G196800, Glyma.08G189200, Glyma.08G189500, Glyma.08G189600, Glyma.16G037600
2VS7	Up	GO:0008356	0.00129036	0.234672	2	4	asymmetric cell division	biological_process	Glyma.05G105600, Glyma.11G047700
2VS7	Up	GO:0009956	0.00129036	0.234672	2	4	radial pattern formation	biological_process	Glyma.05G105600, Glyma.11G047700
2VS7	Up	GO:0004601	0.00137381	0.234672	8	164	peroxidase activity	molecular_function	Glyma.02G233800, Glyma.03G007700, Glyma.07G130800, Glyma.09G022300, Glyma.09G057100, Glyma.10G009400, Glyma.18G055500, Glyma.20G029600
2VS7	Up	GO:0043565	0.00163093	0.255377	4	38	sequence-specific DNA binding	molecular_function	Glyma.05G105600, Glyma.11G047700, XLOC_002575, XLOC_028335
2VS7	Up	GO:0022857	0.00197297	0.268477	7	134	transmembrane transporter activity	molecular_function	Glyma.06G112100, Glyma.06G149500, Glyma.06G192100, Glyma.13G227100, Glyma.14G148100, Glyma.14G148300, Glyma.17G207800
2VS7	Up	GO:0016705	0.00200036	0.268477	11	293	oxidoreductase activity, acting on paired donors, with incorporation or reduction of molecular oxygen	molecular_function	Glyma.03G226800, Glyma.05G220500, Glyma.08G193900, Glyma.09G279100, Glyma.10G203500, Glyma.11G062700, Glyma.17G080500, Glyma.17G125400, Glyma.18G297200, Glyma.20G147900, Glyma.U000100
2VS7	Up	GO:0003824	0.00218456	0.273652	13	379	catalytic activity	molecular_function	Glyma.01G172700, Glyma.03G221400, Glyma.05G075100, Glyma.05G151200, Glyma.06G265700, Glyma.09G269400, Glyma.11G091600, Glyma.11G172200, Glyma.12G019800, Glyma.12G215800, Glyma.12G234200, Glyma.17G064600, XLOC_037011
2VS7	Up	GO:0005506	0.00621527	0.729906	11	347	iron ion binding	molecular_function	Glyma.03G226800, Glyma.05G220500, Glyma.08G193900, Glyma.09G279100, Glyma.10G203500, Glyma.11G062700, Glyma.17G080500, Glyma.17G125400, Glyma.18G297200, Glyma.20G147900, Glyma.U000100
2VS7	Up	GO:0042335	0.0148442	1	1	1	cuticle development	biological_process	XLOC_028335
2VS7	Up	GO:0007275	0.0217562	1	3	44	multicellular organismal development	biological_process	Glyma.01G195900, Glyma.14G089200, Glyma.17G158300
2VS7	Up	GO:0050664	0.0239963	1	2	17	oxidoreductase activity, acting on NAD(P)H, oxygen as acceptor	molecular_function	Glyma.07G130800, Glyma.20G029600
2VS7	Up	GO:0006979	0.0276509	1	6	178	response to oxidative stress	biological_process	Glyma.02G233800, Glyma.03G007700, Glyma.09G022300, Glyma.09G057100, Glyma.10G009400, Glyma.18G055500
2VS7	Up	GO:0048765	0.0294689	1	1	2	root hair cell differentiation	biological_process	XLOC_028335
2VS7	Up	GO:0046983	0.0362376	1	3	61	protein dimerization activity	molecular_function	Glyma.01G020500, Glyma.09G231600, Glyma.17G132700
2VS7	Up	GO:0004659	0.0383099	1	2	22	prenyltransferase activity	molecular_function	Glyma.03G033100, Glyma.10G070300
2VS7	Up	GO:0006351	0.039012	1	5	142	transcription, DNA-templated	biological_process	Glyma.03G128200, Glyma.03G142400, Glyma.10G092100, XLOC_002575, XLOC_028335
2VS7	Up	GO:0016307	0.0475593	1	2	25	phosphatidylinositol phosphate kinase activity	molecular_function	Glyma.05G197200, Glyma.08G004600
2VS7	Up	GO:0016491	0.0488836	1	15	699	oxidoreductase activity	molecular_function	Glyma.04G121700, Glyma.05G124800, Glyma.07G130800, Glyma.08G039300, Glyma.08G169700, Glyma.08G351900, Glyma.10G010700, Glyma.11G035300, Glyma.13G036200, Glyma.13G222100, Glyma.16G153400, Glyma.17G049900, Glyma.17G054600, Glyma.19G008600, Glyma.19G188100
2VS7	Up	GO:0055114	0.0489509	1	4	99	oxidation-reduction process	biological_process	Glyma.07G196800, Glyma.08G189200, Glyma.08G189500, Glyma.08G189600
2VS7	Up	GO:0043481	0.0493613	1	1	4	anthocyanin accumulation in tissues in response to UV light	biological_process	XLOC_028335
2VS8	Down	GO:0009522	1.53341e-09	2.88128e-06	9	33	photosystem I	cellular_component	Glyma.08G204800, Glyma.09G087700, Glyma.09G090100, Glyma.10G256000, Glyma.13G129500, Glyma.13G357300, Glyma.15G003800, Glyma.15G194300, Glyma.U016600
2VS8	Down	GO:0015979	8.7142e-09	8.18699e-06	12	87	photosynthesis	biological_process	Glyma.02G061100, Glyma.08G304200, Glyma.09G073900, Glyma.09G087700, Glyma.09G090100, Glyma.10G256000, Glyma.10G290700, Glyma.15G194300, Glyma.15G253700, Glyma.18G046700, Glyma.18G114900, Glyma.U016600
2VS8	Down	GO:0009765	8.2737e-07	0.000410993	7	34	photosynthesis, light harvesting	biological_process	Glyma.02G305400, Glyma.07G047600, Glyma.08G074000, Glyma.13G282000, Glyma.15G179400, Glyma.16G145800, Glyma.20G212900
2VS8	Down	GO:0009523	8.74919e-07	0.000410993	9	66	photosystem II	cellular_component	Glyma.02G061100, Glyma.08G304200, Glyma.09G073900, Glyma.10G290700, Glyma.15G253700, Glyma.18G046700, Glyma.18G114900, XLOC_019823, XLOC_034334
2VS8	Down	GO:0006633	3.52474e-06	0.0013246	8	64	fatty acid biosynthetic process	biological_process	Glyma.04G057800, Glyma.06G058500, Glyma.06G118500, Glyma.10G274400, Glyma.12G075100, Glyma.17G069100, Glyma.20G115500, Glyma.20G240900
2VS8	Down	GO:0008610	8.34253e-06	0.0026126	6	35	lipid biosynthetic process	biological_process	Glyma.04G057800, Glyma.06G058500, Glyma.10G274400, Glyma.12G075100, Glyma.20G115500, Glyma.20G240900
2VS8	Down	GO:0009654	3.4253e-05	0.00919449	6	40	photosystem II oxygen evolving complex	cellular_component	Glyma.02G061100, Glyma.08G304200, Glyma.10G290700, Glyma.15G253700, Glyma.18G046700, Glyma.18G114900
2VS8	Down	GO:0009772	0.000603841	0.141827	3	11	photosynthetic electron transport in photosystem II	biological_process	Glyma.04G095000, XLOC_019823, XLOC_034334
2VS8	Down	GO:0009538	0.000990839	0.206865	3	13	photosystem I reaction center	cellular_component	Glyma.08G204800, Glyma.13G129500, Glyma.13G357300
2VS8	Down	GO:0004553	0.00207672	0.372018	13	365	hydrolase activity, hydrolyzing O-glycosyl compounds	molecular_function	Glyma.03G132700, Glyma.03G226000, Glyma.04G200900, Glyma.05G109600, Glyma.10G017000, Glyma.10G251700, Glyma.12G021300, Glyma.13G278600, Glyma.17G157400, Glyma.17G252400, Glyma.18G165700, Glyma.19G134800, Glyma.19G223000
2VS8	Down	GO:0009579	0.00217786	0.372018	2	5	thylakoid	cellular_component	Glyma.09G090100, Glyma.U016600
2VS8	Down	GO:0010207	0.00243322	0.381002	2	5	photosystem II assembly	biological_process	Glyma.12G200200, Glyma.13G302100
2VS8	Down	GO:0016620	0.0026866	0.388316	3	20	oxidoreductase activity, acting on the aldehyde or oxo group of donors, NAD or NADP as acceptor	molecular_function	Glyma.04G015900, Glyma.16G044900, Glyma.19G106800
2VS8	Down	GO:0045156	0.00365378	0.490389	2	6	electron transporter, transferring electrons within the cyclic electron transport pathway of photosynthesis activity	molecular_function	XLOC_019823, XLOC_034334
2VS8	Down	GO:0006468	0.00442607	0.554439	13	520	protein phosphorylation	biological_process	Glyma.04G139100, Glyma.04G239700, Glyma.06G124200, Glyma.06G257500, Glyma.06G261900, Glyma.06G262400, Glyma.08G061000, Glyma.08G066000, Glyma.12G140200, Glyma.15G021300, Glyma.15G227000, Glyma.16G065700, Glyma.17G047900
2VS8	Down	GO:0005506	0.00516568	0.584902	12	347	iron ion binding	molecular_function	Glyma.02G119600, Glyma.03G030900, Glyma.05G021900, Glyma.08G109900, Glyma.13G120500, Glyma.14G117200, Glyma.17G069100, Glyma.18G272300, Glyma.19G015000, Glyma.20G007200, Glyma.20G018600, XLOC_034334
2VS8	Down	GO:0004097	0.00529183	0.584902	2	9	catechol oxidase activity	molecular_function	Glyma.13G183200, Glyma.18G225000
2VS8	Down	GO:0006073	0.00706311	0.73731	4	49	cellular glucan metabolic process	biological_process	Glyma.05G109600, Glyma.10G251700, Glyma.17G157400, Glyma.18G165700
2VS8	Down	GO:0016762	0.00759631	0.751235	4	50	xyloglucan:xyloglucosyl transferase activity	molecular_function	Glyma.05G109600, Glyma.10G251700, Glyma.17G157400, Glyma.18G165700
2VS8	Down	GO:0016705	0.0107329	0.973663	10	293	oxidoreductase activity, acting on paired donors, with incorporation or reduction of molecular oxygen	molecular_function	Glyma.02G119600, Glyma.03G030900, Glyma.05G021900, Glyma.08G109900, Glyma.13G120500, Glyma.14G117200, Glyma.18G272300, Glyma.19G015000, Glyma.20G007200, Glyma.20G018600
2VS8	Down	GO:0005509	0.0114446	0.973663	5	92	calcium ion binding	molecular_function	Glyma.02G061100, Glyma.08G304200, Glyma.10G290700, Glyma.18G046700, Glyma.18G114900
2VS8	Down	GO:0006090	0.0119182	0.973663	1	2	pyruvate metabolic process	biological_process	Glyma.07G253700
2VS8	Down	GO:0050242	0.0119182	0.973663	1	2	pyruvate, phosphate dikinase activity	molecular_function	Glyma.07G253700
2VS8	Down	GO:0004568	0.0146552	1	2	12	chitinase activity	molecular_function	Glyma.01G160100, Glyma.16G119200
2VS8	Down	GO:0006032	0.0146552	1	2	12	chitin catabolic process	biological_process	Glyma.01G160100, Glyma.16G119200
2VS8	Down	GO:0006772	0.0159659	1	1	1	thiamine metabolic process	biological_process	XLOC_015695
2VS8	Down	GO:0044715	0.0159659	1	1	1	8-oxo-dGDP phosphatase activity	molecular_function	XLOC_015695
2VS8	Down	GO:0010468	0.0159715	1	1	1	regulation of gene expression	biological_process	XLOC_040788
2VS8	Down	GO:0045017	0.0159762	1	1	1	glycerolipid biosynthetic process	biological_process	Glyma.12G114900
2VS8	Down	GO:0016310	0.0164232	1	1	3	phosphorylation	biological_process	Glyma.07G253700
2VS8	Down	GO:0004332	0.0167822	1	2	13	fructose-bisphosphate aldolase activity	molecular_function	Glyma.04G008300, Glyma.11G111400
2VS8	Down	GO:0016168	0.0176511	1	2	13	chlorophyll binding	molecular_function	XLOC_019823, XLOC_034334
2VS8	Down	GO:0004185	0.020472	1	4	69	serine-type carboxypeptidase activity	molecular_function	Glyma.02G204700, Glyma.13G029200, Glyma.15G156200, Glyma.17G073200
2VS8	Down	GO:0005215	0.0220733	1	8	244	transporter activity	molecular_function	Glyma.01G081700, Glyma.03G227500, Glyma.10G005300, Glyma.13G167700, Glyma.17G115300, Glyma.17G139400, Glyma.19G181300, Glyma.19G224400
2VS8	Down	GO:0071949	0.0224951	1	1	2	FAD binding	molecular_function	Glyma.17G174500
2VS8	Down	GO:0008152	0.0227919	1	15	583	metabolic process	biological_process	Glyma.01G113200, Glyma.02G002000, Glyma.04G109400, Glyma.06G183900, Glyma.06G247100, Glyma.09G135700, Glyma.10G011000, Glyma.12G009200, Glyma.12G122700, Glyma.13G183200, Glyma.15G140200, Glyma.18G225000, Glyma.19G036100, Glyma.19G079000, Glyma.20G107800
2VS8	Down	GO:0018298	0.0238152	1	2	18	protein-chromophore linkage	biological_process	XLOC_019823, XLOC_034334
2VS8	Down	GO:0016020	0.0244285	1	16	690	membrane	cellular_component	Glyma.02G188300, Glyma.03G005300, Glyma.04G057800, Glyma.04G240000, Glyma.06G058500, Glyma.06G118500, Glyma.08G050500, Glyma.08G070800, Glyma.10G086800, Glyma.10G274400, Glyma.12G075100, Glyma.12G133700, Glyma.15G014000, Glyma.19G202200, Glyma.20G115500, Glyma.20G240900
2VS8	Down	GO:0006508	0.0248912	1	7	211	proteolysis	biological_process	Glyma.02G215700, Glyma.03G199100, Glyma.06G272800, Glyma.07G205400, Glyma.14G085600, Glyma.19G045800, Glyma.19G196700
2VS8	Down	GO:0009635	0.0316999	1	1	2	response to herbicide	biological_process	XLOC_034334
2VS8	Down	GO:0010242	0.0316999	1	1	2	oxygen evolving activity	molecular_function	XLOC_034334
2VS8	Down	GO:0046912	0.0381839	1	1	3	transferase activity, transferring acyl groups, acyl groups converted into alkyl on transfer	molecular_function	Glyma.15G140200
2VS8	Down	GO:0020037	0.0387187	1	12	455	heme binding	molecular_function	Glyma.02G119600, Glyma.03G030900, Glyma.05G021900, Glyma.08G109900, Glyma.08G179600, Glyma.13G120500, Glyma.14G117200, Glyma.18G211100, Glyma.18G272300, Glyma.19G015000, Glyma.20G007200, Glyma.20G018600
2VS8	Down	GO:0005618	0.0428952	1	5	128	cell wall	cellular_component	Glyma.05G109600, Glyma.09G077100, Glyma.10G251700, Glyma.17G157400, Glyma.18G165700
2VS8	Down	GO:0048544	0.0460279	1	2	30	recognition of pollen	biological_process	Glyma.04G139100, Glyma.08G061000
2VS8	Down	GO:0034599	0.0471599	1	1	3	cellular response to oxidative stress	biological_process	Glyma.12G178800
2VS8	Down	GO:0071486	0.0471599	1	1	3	cellular response to high light intensity	biological_process	Glyma.12G178800
2VS8	Down	GO:0043231	0.0471723	1	1	3	intracellular membrane-bounded organelle	cellular_component	Glyma.09G152100
2VS8	Up	GO:0020037	2.02419e-07	0.000380346	22	455	heme binding	molecular_function	Glyma.02G233800, Glyma.02G298800, Glyma.03G226800, Glyma.05G220500, Glyma.06G221700, Glyma.08G193900, Glyma.08G274500, Glyma.09G022300, Glyma.09G057100, Glyma.09G160900, Glyma.09G279100, Glyma.11G062700, Glyma.13G306900, Glyma.16G055900, Glyma.16G132800, Glyma.16G210300, Glyma.17G125400, Glyma.18G055500, Glyma.18G297200, Glyma.20G147900, Glyma.20G214200, Glyma.U000100
2VS8	Up	GO:0006855	1.51767e-06	0.00142585	9	79	drug transmembrane transport	biological_process	Glyma.05G049700, Glyma.05G054100, Glyma.09G102800, Glyma.09G146800, Glyma.10G239000, Glyma.15G274600, Glyma.17G136400, Glyma.17G136500, XLOC_012515
2VS8	Up	GO:0015238	1.28984e-05	0.00697523	8	79	drug transmembrane transporter activity	molecular_function	Glyma.05G049700, Glyma.05G054100, Glyma.09G102800, Glyma.09G146800, Glyma.10G239000, Glyma.15G274600, Glyma.17G136400, Glyma.17G136500
2VS8	Up	GO:0015297	1.48488e-05	0.00697523	8	81	antiporter activity	molecular_function	Glyma.05G049700, Glyma.05G054100, Glyma.09G102800, Glyma.09G146800, Glyma.10G239000, Glyma.15G274600, Glyma.17G136400, Glyma.17G136500
2VS8	Up	GO:0016020	3.91216e-05	0.0147019	24	690	membrane	cellular_component	Glyma.03G168000, Glyma.03G175300, Glyma.05G049700, Glyma.05G054100, Glyma.06G112100, Glyma.06G149500, Glyma.07G101800, Glyma.09G019600, Glyma.09G102800, Glyma.09G146800, Glyma.10G239000, Glyma.11G042000, Glyma.12G191500, Glyma.13G004400, Glyma.13G081100, Glyma.13G238600, Glyma.14G148100, Glyma.14G148300, Glyma.15G274600, Glyma.16G218100, Glyma.17G136400, Glyma.17G136500, Glyma.17G148600, Glyma.18…
2VS8	Up	GO:0004601	5.16749e-05	0.0161828	10	164	peroxidase activity	molecular_function	Glyma.02G233800, Glyma.06G221700, Glyma.07G130800, Glyma.09G022300, Glyma.09G057100, Glyma.13G306900, Glyma.16G055900, Glyma.16G132800, Glyma.18G055500, Glyma.20G214200
2VS8	Up	GO:0016702	0.000139436	0.0374286	6	56	oxidoreductase activity, acting on single donors with incorporation of molecular oxygen, incorporation of two atoms of oxygen	molecular_function	Glyma.02G208600, Glyma.07G196800, Glyma.08G189200, Glyma.08G189500, Glyma.08G189600, Glyma.16G037600
2VS8	Up	GO:0016705	0.000224069	0.0526283	13	293	oxidoreductase activity, acting on paired donors, with incorporation or reduction of molecular oxygen	molecular_function	Glyma.02G298800, Glyma.03G226800, Glyma.05G220500, Glyma.08G193900, Glyma.08G274500, Glyma.09G160900, Glyma.09G279100, Glyma.11G062700, Glyma.16G210300, Glyma.17G125400, Glyma.18G297200, Glyma.20G147900, Glyma.U000100
2VS8	Up	GO:0006979	0.000406831	0.0849374	9	178	response to oxidative stress	biological_process	Glyma.02G233800, Glyma.06G221700, Glyma.09G022300, Glyma.09G057100, Glyma.13G306900, Glyma.16G055900, Glyma.16G132800, Glyma.18G055500, Glyma.20G214200
2VS8	Up	GO:0005506	0.000863517	0.162255	13	347	iron ion binding	molecular_function	Glyma.02G298800, Glyma.03G226800, Glyma.05G220500, Glyma.08G193900, Glyma.08G274500, Glyma.09G160900, Glyma.09G279100, Glyma.11G062700, Glyma.16G210300, Glyma.17G125400, Glyma.18G297200, Glyma.20G147900, Glyma.U000100
2VS8	Up	GO:0008356	0.00153611	0.24053	2	4	asymmetric cell division	biological_process	Glyma.05G105600, Glyma.11G047700
2VS8	Up	GO:0009956	0.00153611	0.24053	2	4	radial pattern formation	biological_process	Glyma.05G105600, Glyma.11G047700
2VS8	Up	GO:0004650	0.00287873	0.416087	3	25	polygalacturonase activity	molecular_function	Glyma.02G009300, Glyma.09G224800, Glyma.15G275400
2VS8	Up	GO:0004659	0.00350366	0.470242	3	22	prenyltransferase activity	molecular_function	Glyma.03G033100, Glyma.10G070300, Glyma.11G210500
2VS8	Up	GO:0006873	0.00414543	0.48683	2	8	cellular ion homeostasis	biological_process	Glyma.04G027300, Glyma.10G229300
2VS8	Up	GO:0008308	0.00414543	0.48683	2	8	voltage-gated anion channel activity	molecular_function	Glyma.04G027300, Glyma.10G229300
2VS8	Up	GO:0003824	0.00785823	0.806359	12	379	catalytic activity	molecular_function	Glyma.03G221400, Glyma.09G269400, Glyma.11G083800, Glyma.11G091600, Glyma.11G239300, Glyma.12G019800, Glyma.12G215800, Glyma.12G226400, Glyma.12G234200, Glyma.13G285700, Glyma.17G064600, Glyma.18G018100
2VS8	Up	GO:0022857	0.00910459	0.806359	6	134	transmembrane transporter activity	molecular_function	Glyma.06G112100, Glyma.06G149500, Glyma.06G192100, Glyma.13G081100, Glyma.14G148100, Glyma.14G148300
2VS8	Up	GO:0015850	0.00944114	0.806359	1	1	organic hydroxy compound transport	biological_process	XLOC_012515
2VS8	Up	GO:0045048	0.00944114	0.806359	1	1	protein insertion into ER membrane	biological_process	XLOC_012515
2VS8	Up	GO:1901140	0.00944114	0.806359	1	1	p-coumaryl alcohol transport	biological_process	XLOC_012515
2VS8	Up	GO:1901141	0.00944114	0.806359	1	1	regulation of lignin biosynthetic process	biological_process	XLOC_012515
2VS8	Up	GO:0003700	0.0112724	0.920906	20	840	transcription factor activity, sequence-specific DNA binding	molecular_function	Glyma.01G232000, Glyma.03G002300, Glyma.03G128200, Glyma.03G135800, Glyma.03G142400, Glyma.04G173500, Glyma.05G033400, Glyma.05G105600, Glyma.07G017300, Glyma.08G011300, Glyma.08G320200, Glyma.09G129100, Glyma.09G231600, Glyma.10G029600, Glyma.10G092100, Glyma.11G047700, Glyma.13G081600, Glyma.13G102800, Glyma.17G097900, Glyma.17G132700
2VS8	Up	GO:0016491	0.0304249	1	16	699	oxidoreductase activity	molecular_function	Glyma.02G010100, Glyma.04G121700, Glyma.05G124800, Glyma.07G130800, Glyma.08G039300, Glyma.08G169700, Glyma.08G169900, Glyma.08G351900, Glyma.10G010700, Glyma.11G035300, Glyma.13G036200, Glyma.13G222100, Glyma.17G037300, Glyma.17G049900, Glyma.19G008600, Glyma.19G188100
2VS8	Up	GO:0003677	0.0311824	1	20	925	DNA binding	molecular_function	Glyma.02G070000, Glyma.03G007900, Glyma.04G078600, Glyma.06G080200, Glyma.06G195500, Glyma.07G092000, Glyma.08G041500, Glyma.09G149900, Glyma.09G184100, Glyma.09G231600, Glyma.10G241400, Glyma.11G140200, Glyma.11G160200, Glyma.12G003200, Glyma.13G102800, Glyma.14G217700, Glyma.17G132700, Glyma.18G260500, Glyma.19G180300, Glyma.20G175500
2VS8	Up	GO:0006810	0.0419655	1	10	380	transport	biological_process	Glyma.01G008200, Glyma.10G005400, Glyma.10G221100, Glyma.11G042000, Glyma.11G224100, Glyma.13G118900, Glyma.17G148600, Glyma.18G133500, Glyma.20G170400, XLOC_012515
2VS9	Down	GO:0015979	1.83481e-06	0.00344762	12	87	photosynthesis	biological_process	Glyma.08G154300, Glyma.08G304200, Glyma.09G073900, Glyma.09G087700, Glyma.09G090100, Glyma.10G256000, Glyma.10G290700, Glyma.15G174200, Glyma.18G046700, Glyma.18G114900, Glyma.U016600, XLOC_009133
2VS9	Down	GO:0009522	1.75938e-05	0.0165294	8	33	photosystem I	cellular_component	Glyma.08G204800, Glyma.09G087700, Glyma.09G090100, Glyma.10G256000, Glyma.13G357300, Glyma.15G126100, Glyma.U016600, XLOC_009133
2VS9	Down	GO:0009523	3.95969e-05	0.0196727	9	66	photosystem II	cellular_component	Glyma.08G154300, Glyma.08G304200, Glyma.09G073900, Glyma.10G290700, Glyma.15G174200, Glyma.18G046700, Glyma.18G114900, XLOC_019823, XLOC_034334
2VS9	Down	GO:0008610	4.35432e-05	0.0196727	5	35	lipid biosynthetic process	biological_process	Glyma.02G001500, Glyma.06G058500, Glyma.12G075100, Glyma.20G115500, Glyma.20G240900
2VS9	Down	GO:0009765	5.23489e-05	0.0196727	5	34	photosynthesis, light harvesting	biological_process	Glyma.02G305400, Glyma.07G047600, Glyma.13G282000, Glyma.15G179400, Glyma.20G212900
2VS9	Down	GO:0008152	7.49325e-05	0.0234664	17	583	metabolic process	biological_process	Glyma.01G113200, Glyma.02G002000, Glyma.03G221100, Glyma.04G109400, Glyma.04G115300, Glyma.04G243000, Glyma.06G247100, Glyma.09G135700, Glyma.10G011000, Glyma.11G120600, Glyma.12G122700, Glyma.13G183200, Glyma.15G140200, Glyma.18G225000, Glyma.18G265700, Glyma.19G036100, Glyma.19G079000
2VS9	Down	GO:0009654	0.000332576	0.0892728	5	40	photosystem II oxygen evolving complex	cellular_component	Glyma.08G154300, Glyma.08G304200, Glyma.10G290700, Glyma.18G046700, Glyma.18G114900
2VS9	Down	GO:0006633	0.000415279	0.0975387	6	64	fatty acid biosynthetic process	biological_process	Glyma.02G001500, Glyma.06G058500, Glyma.12G075100, Glyma.17G069100, Glyma.20G115500, Glyma.20G240900
2VS9	Down	GO:0010207	0.00115613	0.231325	2	5	photosystem II assembly	biological_process	Glyma.12G200200, Glyma.13G302100
2VS9	Down	GO:0004097	0.00123111	0.231325	2	9	catechol oxidase activity	molecular_function	Glyma.13G183200, Glyma.18G225000
2VS9	Down	GO:0009772	0.00235432	0.374932	4	11	photosynthetic electron transport in photosystem II	biological_process	Glyma.04G095000, Glyma.06G217900, XLOC_019823, XLOC_034334
2VS9	Down	GO:0004564	0.00252103	0.374932	2	6	beta-fructofuranosidase activity	molecular_function	Glyma.05G056300, Glyma.17G138500
2VS9	Down	GO:0006468	0.00259399	0.374932	12	520	protein phosphorylation	biological_process	Glyma.04G139100, Glyma.04G239700, Glyma.06G124200, Glyma.06G257500, Glyma.06G261900, Glyma.06G262400, Glyma.08G061000, Glyma.12G140200, Glyma.13G166900, Glyma.13G352900, Glyma.16G065700, Glyma.17G047900
2VS9	Down	GO:0042132	0.00608091	0.755409	2	12	fructose 1,6-bisphosphate 1-phosphatase activity	molecular_function	Glyma.10G225400, Glyma.18G193600
2VS9	Down	GO:0006090	0.00683446	0.755409	1	2	pyruvate metabolic process	biological_process	Glyma.07G253700
2VS9	Down	GO:0050242	0.00683446	0.755409	1	2	pyruvate, phosphate dikinase activity	molecular_function	Glyma.07G253700
2VS9	Down	GO:0071949	0.00683446	0.755409	1	2	FAD binding	molecular_function	Glyma.17G174500
2VS9	Down	GO:0016310	0.0102342	1	1	3	phosphorylation	biological_process	Glyma.07G253700
2VS9	Down	GO:0010468	0.0110894	1	1	1	regulation of gene expression	biological_process	XLOC_040788
2VS9	Down	GO:0005509	0.0134115	1	5	92	calcium ion binding	molecular_function	Glyma.08G154300, Glyma.08G304200, Glyma.10G290700, Glyma.18G046700, Glyma.18G114900
2VS9	Down	GO:0045017	0.0135429	1	1	1	glycerolipid biosynthetic process	biological_process	Glyma.12G114900
2VS9	Down	GO:0019684	0.0159526	1	3	10	photosynthesis, light reaction	biological_process	Glyma.04G095000, Glyma.06G217900, XLOC_042521
2VS9	Down	GO:0008289	0.0166888	1	3	38	lipid binding	molecular_function	Glyma.03G016600, Glyma.12G194400, Glyma.13G308200
2VS9	Down	GO:0009535	0.0183889	1	5	29	chloroplast thylakoid membrane	cellular_component	XLOC_009133, XLOC_019823, XLOC_034214, XLOC_034334, XLOC_042521
2VS9	Down	GO:0004451	0.0202673	1	1	4	isocitrate lyase activity	molecular_function	Glyma.12G100500
2VS9	Down	GO:0009579	0.0215296	1	2	5	thylakoid	cellular_component	Glyma.09G090100, Glyma.U016600
2VS9	Down	GO:0018298	0.0223038	1	3	18	protein-chromophore linkage	biological_process	XLOC_009133, XLOC_019823, XLOC_034334
2VS9	Down	GO:0009538	0.0246328	1	2	13	photosystem I reaction center	cellular_component	Glyma.08G204800, Glyma.13G357300
2VS9	Down	GO:0006414	0.0261079	1	1	7	translational elongation	biological_process	Glyma.08G036300
2VS9	Down	GO:0015696	0.0270658	1	1	8	ammonium transport	biological_process	Glyma.10G168100
2VS9	Down	GO:0072488	0.0270658	1	1	8	ammonium transmembrane transport	biological_process	Glyma.10G168100
2VS9	Down	GO:0030151	0.0271961	1	1	6	molybdenum ion binding	molecular_function	Glyma.09G050100
2VS9	Down	GO:0004478	0.0274132	1	1	8	methionine adenosyltransferase activity	molecular_function	Glyma.10G144300
2VS9	Down	GO:0005215	0.028781	1	7	244	transporter activity	molecular_function	Glyma.08G328400, Glyma.10G005300, Glyma.13G167700, Glyma.17G115300, Glyma.17G139400, Glyma.19G224400, Glyma.20G247400
2VS9	Down	GO:0016168	0.0296501	1	3	13	chlorophyll binding	molecular_function	XLOC_009133, XLOC_019823, XLOC_034334
2VS9	Down	GO:0046912	0.0297488	1	1	3	transferase activity, transferring acyl groups, acyl groups converted into alkyl on transfer	molecular_function	Glyma.15G140200
2VS9	Down	GO:0004970	0.0305525	1	2	31	ionotropic glutamate receptor activity	molecular_function	Glyma.13G233400, Glyma.14G001100
2VS9	Down	GO:0016491	0.0389969	1	14	699	oxidoreductase activity	molecular_function	Glyma.02G047600, Glyma.05G187700, Glyma.08G208300, Glyma.11G173700, Glyma.12G021500, Glyma.13G183200, Glyma.14G223600, Glyma.15G124700, Glyma.15G240600, Glyma.17G069100, Glyma.18G138300, Glyma.18G225000, XLOC_009133, XLOC_042521
2VS9	Down	GO:0009058	0.039319	1	4	114	biosynthetic process	biological_process	Glyma.07G258500, Glyma.08G269600, Glyma.09G070500, Glyma.17G015600
2VS9	Down	GO:0010309	0.0427162	1	1	4	acireductone dioxygenase [iron(II)-requiring] activity	molecular_function	Glyma.20G150100
2VS9	Down	GO:0034599	0.0429942	1	1	3	cellular response to oxidative stress	biological_process	Glyma.12G178800
2VS9	Down	GO:0071486	0.0429942	1	1	3	cellular response to high light intensity	biological_process	Glyma.12G178800
2VS9	Down	GO:0048544	0.046938	1	2	30	recognition of pollen	biological_process	Glyma.04G139100, Glyma.08G061000
2VS9	Down	GO:0004421	0.0477535	1	1	6	hydroxymethylglutaryl-CoA synthase activity	molecular_function	Glyma.10G108800
2VS9	Down	GO:0016021	0.0489927	1	17	743	integral component of membrane	cellular_component	Glyma.02G164400, Glyma.06G317100, Glyma.09G087200, Glyma.11G066500, Glyma.11G175800, Glyma.16G036000, Glyma.16G114900, Glyma.16G180900, Glyma.18G066000, Glyma.19G185600, Glyma.20G002000, Glyma.20G246300, XLOC_009133, XLOC_019823, XLOC_034214, XLOC_034334, XLOC_042521
2VS9	Down	GO:0045156	0.0492499	1	2	6	electron transporter, transferring electrons within the cyclic electron transport pathway of photosynthesis activity	molecular_function	XLOC_019823, XLOC_034334
2VS9	Up	GO:0020037	2.31571e-07	0.000435122	23	455	heme binding	molecular_function	Glyma.02G233800, Glyma.02G298800, Glyma.03G007700, Glyma.03G226800, Glyma.05G220500, Glyma.08G193900, Glyma.09G022300, Glyma.10G234700, Glyma.11G062700, Glyma.12G195600, Glyma.14G201600, Glyma.15G050800, Glyma.15G156100, Glyma.16G055900, Glyma.17G125400, Glyma.18G080400, Glyma.18G297200, Glyma.19G003600, Glyma.19G014600, Glyma.20G147900, Glyma.20G159700, Glyma.20G214200, Glyma.U000100
2VS9	Up	GO:0003824	5.25277e-06	0.00493498	19	379	catalytic activity	molecular_function	Glyma.01G118000, Glyma.01G172700, Glyma.03G221400, Glyma.05G075100, Glyma.05G151200, Glyma.06G082700, Glyma.06G126300, Glyma.06G265700, Glyma.07G083700, Glyma.09G269400, Glyma.11G091600, Glyma.11G172200, Glyma.12G019800, Glyma.12G215800, Glyma.12G234200, Glyma.13G231700, Glyma.13G285700, Glyma.17G064600, Glyma.18G018100
2VS9	Up	GO:0016705	3.22703e-05	0.020212	15	293	oxidoreductase activity, acting on paired donors, with incorporation or reduction of molecular oxygen	molecular_function	Glyma.02G298800, Glyma.03G226800, Glyma.05G220500, Glyma.08G193900, Glyma.10G234700, Glyma.11G062700, Glyma.15G156100, Glyma.17G125400, Glyma.18G080400, Glyma.18G297200, Glyma.19G003600, Glyma.19G014600, Glyma.20G147900, Glyma.20G159700, Glyma.U000100
2VS9	Up	GO:0015238	0.000157865	0.0477703	7	79	drug transmembrane transporter activity	molecular_function	Glyma.02G090000, Glyma.09G102800, Glyma.09G146800, Glyma.10G239000, Glyma.15G274600, Glyma.17G136400, Glyma.19G001600
2VS9	Up	GO:0006855	0.000170222	0.0477703	7	79	drug transmembrane transport	biological_process	Glyma.02G090000, Glyma.09G102800, Glyma.09G146800, Glyma.10G239000, Glyma.15G274600, Glyma.17G136400, Glyma.19G001600
2VS9	Up	GO:0005506	0.000174122	0.0477703	15	347	iron ion binding	molecular_function	Glyma.02G298800, Glyma.03G226800, Glyma.05G220500, Glyma.08G193900, Glyma.10G234700, Glyma.11G062700, Glyma.15G156100, Glyma.17G125400, Glyma.18G080400, Glyma.18G297200, Glyma.19G003600, Glyma.19G014600, Glyma.20G147900, Glyma.20G159700, Glyma.U000100
2VS9	Up	GO:0015297	0.000177963	0.0477703	7	81	antiporter activity	molecular_function	Glyma.02G090000, Glyma.09G102800, Glyma.09G146800, Glyma.10G239000, Glyma.15G274600, Glyma.17G136400, Glyma.19G001600
2VS9	Up	GO:0016020	0.000664887	0.156165	22	690	membrane	cellular_component	Glyma.02G090000, Glyma.03G168000, Glyma.03G175300, Glyma.04G211800, Glyma.06G112100, Glyma.06G149500, Glyma.07G101800, Glyma.09G019600, Glyma.09G102800, Glyma.09G146800, Glyma.10G239000, Glyma.12G191500, Glyma.13G004400, Glyma.13G238600, Glyma.14G148300, Glyma.15G274600, Glyma.16G218100, Glyma.17G136400, Glyma.17G148600, Glyma.18G133500, Glyma.19G001600, Glyma.20G152500
2VS9	Up	GO:0016702	0.00160963	0.336055	5	56	oxidoreductase activity, acting on single donors with incorporation of molecular oxygen, incorporation of two atoms of oxygen	molecular_function	Glyma.02G208600, Glyma.07G196800, Glyma.08G189200, Glyma.08G189500, Glyma.16G037600
2VS9	Up	GO:0004601	0.00259876	0.488308	8	164	peroxidase activity	molecular_function	Glyma.02G233800, Glyma.03G007700, Glyma.09G022300, Glyma.12G195600, Glyma.14G201600, Glyma.15G050800, Glyma.16G055900, Glyma.20G214200
2VS9	Up	GO:0004650	0.00376782	0.62994	3	25	polygalacturonase activity	molecular_function	Glyma.02G009300, Glyma.09G224800, Glyma.15G275400
2VS9	Up	GO:0006979	0.00402303	0.62994	8	178	response to oxidative stress	biological_process	Glyma.02G233800, Glyma.03G007700, Glyma.09G022300, Glyma.12G195600, Glyma.14G201600, Glyma.15G050800, Glyma.16G055900, Glyma.20G214200
2VS9	Up	GO:0030599	0.0106037	1	4	63	pectinesterase activity	molecular_function	Glyma.01G138000, Glyma.02G008400, Glyma.02G086900, Glyma.03G029000
2VS9	Up	GO:0003700	0.014949	1	21	840	transcription factor activity, sequence-specific DNA binding	molecular_function	Glyma.01G020500, Glyma.01G195900, Glyma.02G006200, Glyma.03G128200, Glyma.03G135800, Glyma.03G142400, Glyma.03G145800, Glyma.04G173500, Glyma.05G033400, Glyma.05G108600, Glyma.08G320200, Glyma.09G231600, Glyma.10G029600, Glyma.10G092100, Glyma.11G047700, Glyma.13G081600, Glyma.13G102800, Glyma.13G122700, Glyma.17G097900, Glyma.17G158300, Glyma.20G203500
2VS9	Up	GO:0004365	0.0152277	1	1	1	glyceraldehyde-3-phosphate dehydrogenase (NAD+) (phosphorylating) activity	molecular_function	XLOC_013425
2VS9	Up	GO:0006952	0.0157085	1	4	71	defense response	biological_process	Glyma.06G249800, Glyma.15G145700, Glyma.15G217100, Glyma.15G218900
2VS9	Up	GO:0004588	0.0161949	1	1	1	orotate phosphoribosyltransferase activity	molecular_function	XLOC_032363
2VS9	Up	GO:0044205	0.0161949	1	1	1	'de novo' UMP biosynthetic process	biological_process	XLOC_032363
2VS9	Up	GO:0007275	0.0283307	1	3	44	multicellular organismal development	biological_process	Glyma.01G195900, Glyma.05G108600, Glyma.17G158300
2VS9	Up	GO:0042545	0.0310426	1	3	50	cell wall modification	biological_process	Glyma.01G138000, Glyma.02G008400, Glyma.03G029000
2VS9	Up	GO:0004659	0.0461162	1	2	22	prenyltransferase activity	molecular_function	Glyma.03G033100, Glyma.10G070300
2VS9	Up	GO:0022857	0.0463025	1	5	134	transmembrane transporter activity	molecular_function	Glyma.04G171800, Glyma.06G112100, Glyma.06G149500, Glyma.06G192100, Glyma.14G148300
2VS9	Up	GO:0006207	0.0480665	1	1	3	'de novo' pyrimidine nucleobase biosynthetic process	biological_process	XLOC_032363
2VS10	Down	GO:0015979	7.65165e-08	0.000143775	11	87	photosynthesis	biological_process	Glyma.08G154300, Glyma.09G073900, Glyma.09G087700, Glyma.09G090100, Glyma.10G256000, Glyma.10G290700, Glyma.15G080200, Glyma.15G174200, Glyma.18G046700, Glyma.U016600, XLOC_009133
2VS10	Down	GO:0009522	6.27502e-07	0.000589538	7	33	photosystem I	cellular_component	Glyma.07G019700, Glyma.09G087700, Glyma.09G090100, Glyma.10G256000, Glyma.13G129500, Glyma.U016600, XLOC_009133
2VS10	Down	GO:0008610	7.16221e-06	0.00448593	6	35	lipid biosynthetic process	biological_process	Glyma.04G057800, Glyma.06G058500, Glyma.10G274400, Glyma.12G075100, Glyma.20G115500, Glyma.20G240900
2VS10	Down	GO:0006633	3.03016e-05	0.0142342	7	64	fatty acid biosynthetic process	biological_process	Glyma.04G057800, Glyma.06G058500, Glyma.06G118500, Glyma.10G274400, Glyma.12G075100, Glyma.20G115500, Glyma.20G240900
2VS10	Down	GO:0016168	3.79051e-05	0.0142447	4	13	chlorophyll binding	molecular_function	Glyma.05G074900, XLOC_009133, XLOC_019823, XLOC_034334
2VS10	Down	GO:0009523	7.00293e-05	0.0219308	7	66	photosystem II	cellular_component	Glyma.08G154300, Glyma.09G073900, Glyma.10G290700, Glyma.15G174200, Glyma.18G046700, XLOC_019823, XLOC_034334
2VS10	Down	GO:0009772	0.000574927	0.154327	3	11	photosynthetic electron transport in photosystem II	biological_process	Glyma.04G095000, XLOC_019823, XLOC_034334
2VS10	Down	GO:0006073	0.000887977	0.170755	5	49	cellular glucan metabolic process	biological_process	Glyma.05G109600, Glyma.10G251700, Glyma.12G197600, Glyma.17G157400, Glyma.18G165700
2VS10	Down	GO:0016762	0.000976473	0.170755	5	50	xyloglucan:xyloglucosyl transferase activity	molecular_function	Glyma.05G109600, Glyma.10G251700, Glyma.12G197600, Glyma.17G157400, Glyma.18G165700
2VS10	Down	GO:0016705	0.000997791	0.170755	12	293	oxidoreductase activity, acting on paired donors, with incorporation or reduction of molecular oxygen	molecular_function	Glyma.02G256800, Glyma.05G021900, Glyma.08G109900, Glyma.10G202400, Glyma.11G060100, Glyma.13G068500, Glyma.14G117200, Glyma.17G242200, Glyma.18G028300, Glyma.18G272300, Glyma.20G007200, Glyma.20G188000
2VS10	Down	GO:0009535	0.000999632	0.170755	4	29	chloroplast thylakoid membrane	cellular_component	XLOC_009133, XLOC_016679, XLOC_019823, XLOC_034334
2VS10	Down	GO:0005506	0.00149548	0.223795	13	347	iron ion binding	molecular_function	Glyma.02G256800, Glyma.05G021900, Glyma.08G109900, Glyma.10G202400, Glyma.11G060100, Glyma.13G068500, Glyma.14G117200, Glyma.17G242200, Glyma.18G028300, Glyma.18G272300, Glyma.20G007200, Glyma.20G188000, XLOC_034334
2VS10	Down	GO:0018298	0.00154834	0.223795	3	18	protein-chromophore linkage	biological_process	XLOC_009133, XLOC_019823, XLOC_034334
2VS10	Down	GO:0005215	0.00198291	0.261495	10	244	transporter activity	molecular_function	Glyma.01G081700, Glyma.03G227500, Glyma.10G005300, Glyma.10G296600, Glyma.13G167700, Glyma.17G115300, Glyma.17G139400, Glyma.18G299200, Glyma.19G181300, Glyma.20G247400
2VS10	Down	GO:0009579	0.00208751	0.261495	2	5	thylakoid	cellular_component	Glyma.09G090100, Glyma.U016600
2VS10	Down	GO:0010207	0.00235185	0.276195	2	5	photosystem II assembly	biological_process	Glyma.12G200200, Glyma.13G302100
2VS10	Down	GO:0045156	0.00353538	0.390763	2	6	electron transporter, transferring electrons within the cyclic electron transport pathway of photosynthesis activity	molecular_function	XLOC_019823, XLOC_034334
2VS10	Down	GO:0016020	0.00420549	0.439006	18	690	membrane	cellular_component	Glyma.01G058600, Glyma.02G188300, Glyma.04G057800, Glyma.04G240000, Glyma.04G250600, Glyma.05G074900, Glyma.06G058500, Glyma.06G118500, Glyma.08G070800, Glyma.08G282600, Glyma.09G160000, Glyma.10G274400, Glyma.12G075100, Glyma.15G197800, Glyma.17G108200, Glyma.19G202200, Glyma.20G115500, Glyma.20G240900
2VS10	Down	GO:0004553	0.00470643	0.463166	12	365	hydrolase activity, hydrolyzing O-glycosyl compounds	molecular_function	Glyma.05G109600, Glyma.08G150400, Glyma.10G017000, Glyma.10G251700, Glyma.12G021300, Glyma.12G197600, Glyma.13G278600, Glyma.17G157400, Glyma.17G252400, Glyma.18G165700, Glyma.19G134800, Glyma.19G223000
2VS10	Down	GO:0004097	0.00492992	0.463166	2	9	catechol oxidase activity	molecular_function	Glyma.13G183200, Glyma.18G225000
2VS10	Down	GO:0006508	0.00686353	0.614123	8	211	proteolysis	biological_process	Glyma.02G215700, Glyma.03G199100, Glyma.05G132000, Glyma.06G272800, Glyma.07G205400, Glyma.14G085600, Glyma.19G045800, Glyma.19G196700
2VS10	Down	GO:0045261	0.00884634	0.755558	2	11	proton-transporting ATP synthase complex, catalytic core F(1)	cellular_component	Glyma.13G204800, XLOC_016679
2VS10	Down	GO:0005618	0.0112396	0.91823	6	128	cell wall	cellular_component	Glyma.05G109600, Glyma.09G077100, Glyma.10G251700, Glyma.12G197600, Glyma.17G157400, Glyma.18G165700
2VS10	Down	GO:0009507	0.0119889	0.938629	5	90	chloroplast	cellular_component	XLOC_009133, XLOC_014132, XLOC_014230, XLOC_015695, XLOC_016679
2VS10	Down	GO:0046933	0.0153711	1	2	14	proton-transporting ATP synthase activity, rotational mechanism	molecular_function	Glyma.13G204800, XLOC_016679
2VS10	Down	GO:0009765	0.015425	1	3	34	photosynthesis, light harvesting	biological_process	Glyma.07G047600, Glyma.15G179400, Glyma.20G212900
2VS10	Down	GO:0006772	0.0156994	1	1	1	thiamine metabolic process	biological_process	XLOC_015695
2VS10	Down	GO:0044715	0.0156994	1	1	1	8-oxo-dGDP phosphatase activity	molecular_function	XLOC_015695
2VS10	Down	GO:0010468	0.0157053	1	1	1	regulation of gene expression	biological_process	XLOC_040788
2VS10	Down	GO:0009538	0.0167291	1	2	13	photosystem I reaction center	cellular_component	Glyma.07G019700, Glyma.13G129500
2VS10	Down	GO:0006468	0.0195052	1	11	520	protein phosphorylation	biological_process	Glyma.04G139100, Glyma.04G239700, Glyma.06G124200, Glyma.06G257500, Glyma.06G261900, Glyma.08G061000, Glyma.10G081300, Glyma.13G166900, Glyma.15G227000, Glyma.16G065700, Glyma.17G047900
2VS10	Down	GO:0071949	0.0214731	1	1	2	FAD binding	molecular_function	Glyma.17G174500
2VS10	Down	GO:0006810	0.0230953	1	10	380	transport	biological_process	Glyma.01G081700, Glyma.03G227500, Glyma.10G005300, Glyma.10G296600, Glyma.13G167700, Glyma.17G115300, Glyma.17G139400, Glyma.18G299200, Glyma.19G181300, Glyma.20G247400
2VS10	Down	GO:0009654	0.0234565	1	3	40	photosystem II oxygen evolving complex	cellular_component	Glyma.08G154300, Glyma.10G290700, Glyma.18G046700
2VS10	Down	GO:0009635	0.031177	1	1	2	response to herbicide	biological_process	XLOC_034334
2VS10	Down	GO:0010242	0.031177	1	1	2	oxygen evolving activity	molecular_function	XLOC_034334
2VS10	Down	GO:0020037	0.0335409	1	12	455	heme binding	molecular_function	Glyma.02G256800, Glyma.05G021900, Glyma.08G109900, Glyma.10G202400, Glyma.11G060100, Glyma.13G068500, Glyma.14G117200, Glyma.17G242200, Glyma.18G028300, Glyma.18G272300, Glyma.20G007200, Glyma.20G188000
2VS10	Down	GO:0015986	0.0360599	1	2	21	ATP synthesis coupled proton transport	biological_process	Glyma.13G204800, XLOC_016679
2VS10	Down	GO:0046912	0.0369149	1	1	3	transferase activity, transferring acyl groups, acyl groups converted into alkyl on transfer	molecular_function	Glyma.15G140200
2VS10	Down	GO:0008152	0.0378044	1	14	583	metabolic process	biological_process	Glyma.03G014300, Glyma.03G221100, Glyma.04G109400, Glyma.06G247100, Glyma.09G135700, Glyma.12G009200, Glyma.12G122700, Glyma.13G183200, Glyma.15G140200, Glyma.18G225000, Glyma.18G265700, Glyma.19G079000, Glyma.19G218100, Glyma.20G161200
2VS10	Down	GO:0048544	0.0426227	1	2	30	recognition of pollen	biological_process	Glyma.04G139100, Glyma.08G061000
2VS10	Down	GO:0043231	0.0464	1	1	3	intracellular membrane-bounded organelle	cellular_component	Glyma.09G152100
2VS10	Down	GO:0005875	0.0472207	1	2	23	microtubule associated complex	cellular_component	Glyma.06G270500, Glyma.07G138900
2VS10	Up	GO:0020037	2.42623e-13	4.55889e-10	31	455	heme binding	molecular_function	Glyma.01G130800, Glyma.02G233800, Glyma.02G298800, Glyma.03G160300, Glyma.03G226800, Glyma.05G220500, Glyma.06G221700, Glyma.08G193900, Glyma.08G274500, Glyma.09G022300, Glyma.09G048900, Glyma.09G057100, Glyma.09G279100, Glyma.09G284400, Glyma.10G009400, Glyma.10G191700, Glyma.10G234600, Glyma.10G234700, Glyma.11G062700, Glyma.14G201600, Glyma.15G156100, Glyma.16G055900, Glyma.17G125400, Glyma.18…
2VS10	Up	GO:0016705	4.16149e-08	3.90972e-05	19	293	oxidoreductase activity, acting on paired donors, with incorporation or reduction of molecular oxygen	molecular_function	Glyma.02G298800, Glyma.03G160300, Glyma.03G226800, Glyma.05G220500, Glyma.08G193900, Glyma.08G274500, Glyma.09G048900, Glyma.09G279100, Glyma.10G234600, Glyma.10G234700, Glyma.11G062700, Glyma.15G156100, Glyma.17G125400, Glyma.18G080400, Glyma.18G297200, Glyma.19G014600, Glyma.20G147900, Glyma.20G159700, Glyma.U000100
2VS10	Up	GO:0005506	4.36358e-07	0.000273306	19	347	iron ion binding	molecular_function	Glyma.02G298800, Glyma.03G160300, Glyma.03G226800, Glyma.05G220500, Glyma.08G193900, Glyma.08G274500, Glyma.09G048900, Glyma.09G279100, Glyma.10G234600, Glyma.10G234700, Glyma.11G062700, Glyma.15G156100, Glyma.17G125400, Glyma.18G080400, Glyma.18G297200, Glyma.19G014600, Glyma.20G147900, Glyma.20G159700, Glyma.U000100
2VS10	Up	GO:0004601	3.03231e-06	0.00142443	12	164	peroxidase activity	molecular_function	Glyma.01G130800, Glyma.02G233800, Glyma.06G221700, Glyma.09G022300, Glyma.09G057100, Glyma.09G284400, Glyma.10G009400, Glyma.10G191700, Glyma.14G201600, Glyma.16G055900, Glyma.18G055500, Glyma.20G214200
2VS10	Up	GO:0006979	6.3689e-06	0.00239343	12	178	response to oxidative stress	biological_process	Glyma.01G130800, Glyma.02G233800, Glyma.06G221700, Glyma.09G022300, Glyma.09G057100, Glyma.09G284400, Glyma.10G009400, Glyma.10G191700, Glyma.14G201600, Glyma.16G055900, Glyma.18G055500, Glyma.20G214200
2VS10	Up	GO:0015238	0.000870468	0.225982	6	79	drug transmembrane transporter activity	molecular_function	Glyma.02G090000, Glyma.09G102800, Glyma.09G146800, Glyma.10G239000, Glyma.15G274600, Glyma.17G136400
2VS10	Up	GO:0006855	0.000927568	0.225982	6	79	drug transmembrane transport	biological_process	Glyma.02G090000, Glyma.09G102800, Glyma.09G146800, Glyma.10G239000, Glyma.15G274600, Glyma.17G136400
2VS10	Up	GO:0015297	0.000962139	0.225982	6	81	antiporter activity	molecular_function	Glyma.02G090000, Glyma.09G102800, Glyma.09G146800, Glyma.10G239000, Glyma.15G274600, Glyma.17G136400
2VS10	Up	GO:0016702	0.00135707	0.283325	5	56	oxidoreductase activity, acting on single donors with incorporation of molecular oxygen, incorporation of two atoms of oxygen	molecular_function	Glyma.02G208600, Glyma.07G196800, Glyma.08G189200, Glyma.08G189500, Glyma.16G037600
2VS10	Up	GO:0005199	0.00315835	0.593453	2	7	structural constituent of cell wall	molecular_function	XLOC_027395, XLOC_028247
2VS10	Up	GO:0006873	0.0047768	0.747967	2	8	cellular ion homeostasis	biological_process	Glyma.04G027300, Glyma.10G229300
2VS10	Up	GO:0008308	0.0047768	0.747967	2	8	voltage-gated anion channel activity	molecular_function	Glyma.04G027300, Glyma.10G229300
2VS10	Up	GO:0030599	0.00929256	1	4	63	pectinesterase activity	molecular_function	Glyma.01G138000, Glyma.02G008400, Glyma.02G086900, Glyma.10G010500
2VS10	Up	GO:0003824	0.0097605	1	12	379	catalytic activity	molecular_function	Glyma.01G172700, Glyma.03G221400, Glyma.06G265700, Glyma.09G269400, Glyma.11G091600, Glyma.12G019800, Glyma.12G215800, Glyma.12G234200, Glyma.13G231700, Glyma.13G285700, Glyma.17G064600, Glyma.18G018100
2VS10	Up	GO:0016020	0.0106285	1	18	690	membrane	cellular_component	Glyma.02G090000, Glyma.03G168000, Glyma.03G175300, Glyma.06G112100, Glyma.06G149500, Glyma.09G019600, Glyma.09G102800, Glyma.09G146800, Glyma.10G239000, Glyma.12G191500, Glyma.13G004400, Glyma.13G238600, Glyma.14G148300, Glyma.15G274600, Glyma.16G218100, Glyma.17G136400, Glyma.17G148600, Glyma.18G133500
2VS10	Up	GO:0009530	0.0134006	1	1	1	primary cell wall	cellular_component	XLOC_028247
2VS10	Up	GO:0010154	0.0158283	1	1	1	fruit development	biological_process	XLOC_028354
2VS10	Up	GO:0032441	0.0158283	1	1	1	pheophorbide a oxygenase activity	molecular_function	XLOC_028354
2VS10	Up	GO:0016491	0.0226705	1	17	699	oxidoreductase activity	molecular_function	Glyma.02G010100, Glyma.04G121700, Glyma.05G124800, Glyma.08G039300, Glyma.08G169700, Glyma.08G169900, Glyma.09G046400, Glyma.10G010700, Glyma.11G035300, Glyma.13G036200, Glyma.13G222100, Glyma.15G223900, Glyma.16G153400, Glyma.17G037300, Glyma.17G049900, Glyma.19G008600, Glyma.19G188100
2VS10	Up	GO:0009664	0.0290177	1	1	2	plant-type cell wall organization	biological_process	XLOC_028247
2VS10	Up	GO:0005618	0.0301732	1	5	128	cell wall	cellular_component	Glyma.01G138000, Glyma.02G008400, Glyma.02G086900, Glyma.10G010500, XLOC_027395
2VS10	Up	GO:0009816	0.0302782	1	1	3	defense response to bacterium, incompatible interaction	biological_process	XLOC_028354
2VS10	Up	GO:0003700	0.0346884	1	19	840	transcription factor activity, sequence-specific DNA binding	molecular_function	Glyma.01G195900, Glyma.01G232000, Glyma.02G006200, Glyma.03G128200, Glyma.03G135800, Glyma.03G142400, Glyma.03G162500, Glyma.04G173500, Glyma.05G033400, Glyma.08G320200, Glyma.09G231600, Glyma.10G029600, Glyma.10G092100, Glyma.11G047700, Glyma.13G081600, Glyma.13G102800, Glyma.17G097900, Glyma.17G158300, Glyma.19G163800
2VS10	Up	GO:0004650	0.0369704	1	2	25	polygalacturonase activity	molecular_function	Glyma.09G224800, Glyma.15G275400
2VS10	Up	GO:0022857	0.040334	1	5	134	transmembrane transporter activity	molecular_function	Glyma.04G171800, Glyma.06G112100, Glyma.06G149500, Glyma.06G192100, Glyma.14G148300
2VS10	Up	GO:0012511	0.0421482	1	1	3	monolayer-surrounded lipid storage body	cellular_component	Glyma.17G122000
2VS10	Up	GO:0010181	0.0425282	1	2	23	FMN binding	molecular_function	Glyma.15G223900, Glyma.17G049900
2VS10	Up	GO:0004659	0.0430108	1	2	22	prenyltransferase activity	molecular_function	Glyma.03G033100, Glyma.10G070300
2VS10	Up	GO:0009534	0.0451688	1	1	3	chloroplast thylakoid	cellular_component	XLOC_028354
2VS10	Up	GO:0008219	0.045894	1	1	3	cell death	biological_process	XLOC_028354
2VS11	Down	GO:0009523	6.26424e-07	0.000595932	9	66	photosystem II	cellular_component	Glyma.01G050900, Glyma.02G094900, Glyma.04G241000, Glyma.09G073900, Glyma.10G290700, Glyma.18G046700, Glyma.18G114900, XLOC_019823, XLOC_034334
2VS11	Down	GO:0015979	6.34308e-07	0.000595932	10	87	photosynthesis	biological_process	Glyma.01G050900, Glyma.02G094900, Glyma.04G241000, Glyma.09G073900, Glyma.09G090100, Glyma.10G256000, Glyma.10G290700, Glyma.18G046700, Glyma.18G114900, Glyma.U016600
2VS11	Down	GO:0009772	1.6199e-05	0.00912058	4	11	photosynthetic electron transport in photosystem II	biological_process	Glyma.04G095000, Glyma.06G217900, XLOC_019823, XLOC_034334
2VS11	Down	GO:0016705	1.94158e-05	0.00912058	15	293	oxidoreductase activity, acting on paired donors, with incorporation or reduction of molecular oxygen	molecular_function	Glyma.01G179400, Glyma.02G119600, Glyma.03G030900, Glyma.08G109900, Glyma.10G202400, Glyma.11G060100, Glyma.12G191400, Glyma.13G147500, Glyma.14G117200, Glyma.17G209100, Glyma.18G272300, Glyma.19G015000, Glyma.20G007200, Glyma.20G018600, Glyma.20G188000
2VS11	Down	GO:0009654	2.75267e-05	0.0103445	6	40	photosystem II oxygen evolving complex	cellular_component	Glyma.01G050900, Glyma.02G094900, Glyma.04G241000, Glyma.10G290700, Glyma.18G046700, Glyma.18G114900
2VS11	Down	GO:0005506	3.91444e-05	0.0122587	16	347	iron ion binding	molecular_function	Glyma.01G179400, Glyma.02G119600, Glyma.03G030900, Glyma.08G109900, Glyma.10G202400, Glyma.11G060100, Glyma.12G191400, Glyma.13G147500, Glyma.14G117200, Glyma.17G209100, Glyma.18G272300, Glyma.19G015000, Glyma.20G007200, Glyma.20G018600, Glyma.20G188000, XLOC_034334
2VS11	Down	GO:0008610	0.000112087	0.0300873	5	35	lipid biosynthetic process	biological_process	Glyma.04G057800, Glyma.06G058500, Glyma.10G274400, Glyma.20G115500, Glyma.20G240900
2VS11	Down	GO:0009765	0.00014835	0.0348438	5	34	photosynthesis, light harvesting	biological_process	Glyma.07G047600, Glyma.08G074000, Glyma.09G154700, Glyma.15G179400, Glyma.16G145800
2VS11	Down	GO:0006633	0.000272297	0.0568495	6	64	fatty acid biosynthetic process	biological_process	Glyma.04G057800, Glyma.06G058500, Glyma.06G118500, Glyma.10G274400, Glyma.20G115500, Glyma.20G240900
2VS11	Down	GO:0045261	0.000350653	0.0658877	3	11	proton-transporting ATP synthase complex, catalytic core F(1)	cellular_component	Glyma.02G184000, Glyma.13G204800, XLOC_016679
2VS11	Down	GO:0019684	0.000392087	0.0669756	3	10	photosynthesis, light reaction	biological_process	Glyma.04G095000, Glyma.06G217900, XLOC_042521
2VS11	Down	GO:0042132	0.000674776	0.105659	3	12	fructose 1,6-bisphosphate 1-phosphatase activity	molecular_function	Glyma.07G142700, Glyma.10G225400, Glyma.18G193600
2VS11	Down	GO:0046933	0.000825345	0.108366	3	14	proton-transporting ATP synthase activity, rotational mechanism	molecular_function	Glyma.02G184000, Glyma.13G204800, XLOC_016679
2VS11	Down	GO:0016168	0.000903264	0.108366	3	13	chlorophyll binding	molecular_function	Glyma.08G281300, XLOC_019823, XLOC_034334
2VS11	Down	GO:0009535	0.00091593	0.108366	4	29	chloroplast thylakoid membrane	cellular_component	XLOC_016679, XLOC_019823, XLOC_034334, XLOC_042521
2VS11	Down	GO:0008289	0.00092275	0.108366	4	38	lipid binding	molecular_function	Glyma.03G016600, Glyma.07G076800, Glyma.12G194400, Glyma.13G308200
2VS11	Down	GO:0009522	0.00152366	0.168409	4	33	photosystem I	cellular_component	Glyma.08G204800, Glyma.09G090100, Glyma.10G256000, Glyma.U016600
2VS11	Down	GO:0005509	0.00204721	0.196657	6	92	calcium ion binding	molecular_function	Glyma.01G050900, Glyma.02G094900, Glyma.04G241000, Glyma.10G290700, Glyma.18G046700, Glyma.18G114900
2VS11	Down	GO:0009579	0.00205213	0.196657	2	5	thylakoid	cellular_component	Glyma.09G090100, Glyma.U016600
2VS11	Down	GO:0005215	0.00209321	0.196657	10	244	transporter activity	molecular_function	Glyma.01G081700, Glyma.05G030400, Glyma.08G328400, Glyma.10G005300, Glyma.13G167700, Glyma.14G191300, Glyma.17G096400, Glyma.17G115300, Glyma.17G139400, Glyma.18G299200
2VS11	Down	GO:0020037	0.00249283	0.212915	15	455	heme binding	molecular_function	Glyma.01G179400, Glyma.02G119600, Glyma.03G030900, Glyma.08G109900, Glyma.10G202400, Glyma.11G060100, Glyma.12G191400, Glyma.13G147500, Glyma.14G117200, Glyma.17G209100, Glyma.18G272300, Glyma.19G015000, Glyma.20G007200, Glyma.20G018600, Glyma.20G188000
2VS11	Down	GO:0016620	0.00249288	0.212915	3	20	oxidoreductase activity, acting on the aldehyde or oxo group of donors, NAD or NADP as acceptor	molecular_function	Glyma.04G015900, Glyma.16G044900, Glyma.19G106800
2VS11	Down	GO:0015986	0.00311221	0.254254	3	21	ATP synthesis coupled proton transport	biological_process	Glyma.02G184000, Glyma.13G204800, XLOC_016679
2VS11	Down	GO:0045156	0.00335953	0.263023	2	6	electron transporter, transferring electrons within the cyclic electron transport pathway of photosynthesis activity	molecular_function	XLOC_019823, XLOC_034334
2VS11	Down	GO:0015116	0.00407634	0.306377	3	26	sulfate transmembrane transporter activity	molecular_function	Glyma.06G106200, Glyma.15G014000, Glyma.20G017100
2VS11	Down	GO:0016020	0.00513946	0.36135	18	690	membrane	cellular_component	Glyma.04G057800, Glyma.04G240000, Glyma.06G058500, Glyma.06G106200, Glyma.06G118500, Glyma.08G281300, Glyma.08G282600, Glyma.10G086800, Glyma.10G274400, Glyma.12G020400, Glyma.12G133700, Glyma.14G191300, Glyma.15G014000, Glyma.19G202200, Glyma.20G017100, Glyma.20G115500, Glyma.20G187400, Glyma.20G240900
2VS11	Down	GO:0008272	0.0052673	0.36135	3	28	sulfate transport	biological_process	Glyma.06G106200, Glyma.15G014000, Glyma.20G017100
2VS11	Down	GO:0004097	0.00538468	0.36135	2	9	catechol oxidase activity	molecular_function	Glyma.13G183200, Glyma.18G225000
2VS11	Down	GO:0006468	0.00575618	0.372961	13	520	protein phosphorylation	biological_process	Glyma.04G239700, Glyma.06G257500, Glyma.06G258200, Glyma.06G261900, Glyma.06G262400, Glyma.08G061000, Glyma.08G066000, Glyma.12G007000, Glyma.12G140200, Glyma.13G166900, Glyma.13G352900, Glyma.15G021300, Glyma.15G227000
2VS11	Down	GO:0008271	0.00664831	0.416406	3	30	secondary active sulfate transmembrane transporter activity	molecular_function	Glyma.06G106200, Glyma.15G014000, Glyma.20G017100
2VS11	Down	GO:0008152	0.00880118	0.533465	16	583	metabolic process	biological_process	Glyma.01G113200, Glyma.02G002000, Glyma.03G221100, Glyma.06G183900, Glyma.07G268500, Glyma.09G135700, Glyma.11G120600, Glyma.12G009200, Glyma.12G122700, Glyma.13G183200, Glyma.15G140200, Glyma.17G176200, Glyma.18G225000, Glyma.18G265700, Glyma.19G036100, Glyma.19G218100
2VS11	Down	GO:0006090	0.0144357	0.82175	1	2	pyruvate metabolic process	biological_process	Glyma.07G253700
2VS11	Down	GO:0050242	0.0144357	0.82175	1	2	pyruvate, phosphate dikinase activity	molecular_function	Glyma.07G253700
2VS11	Down	GO:0010468	0.015303	0.82175	1	1	regulation of gene expression	biological_process	XLOC_040788
2VS11	Down	GO:0045017	0.0153067	0.82175	1	1	glycerolipid biosynthetic process	biological_process	Glyma.12G114900
2VS11	Down	GO:0016310	0.0198768	1	1	3	phosphorylation	biological_process	Glyma.07G253700
2VS11	Down	GO:0018298	0.0232186	1	2	18	protein-chromophore linkage	biological_process	XLOC_019823, XLOC_034334
2VS11	Down	GO:0009635	0.0303808	1	1	2	response to herbicide	biological_process	XLOC_034334
2VS11	Down	GO:0010242	0.0303808	1	1	2	oxygen evolving activity	molecular_function	XLOC_034334
2VS11	Down	GO:0006073	0.0371446	1	3	49	cellular glucan metabolic process	biological_process	Glyma.05G109600, Glyma.17G157400, Glyma.18G165700
2VS11	Down	GO:0046912	0.0383152	1	1	3	transferase activity, transferring acyl groups, acyl groups converted into alkyl on transfer	molecular_function	Glyma.15G140200
2VS11	Down	GO:0016762	0.0391246	1	3	50	xyloglucan:xyloglucosyl transferase activity	molecular_function	Glyma.05G109600, Glyma.17G157400, Glyma.18G165700
2VS11	Down	GO:0043231	0.0452249	1	1	3	intracellular membrane-bounded organelle	cellular_component	Glyma.09G152100
2VS11	Down	GO:0048544	0.0481223	1	2	30	recognition of pollen	biological_process	Glyma.06G258200, Glyma.08G061000
2VS11	Up	GO:0020037	5.58691e-07	0.00104978	23	455	heme binding	molecular_function	Glyma.02G233800, Glyma.02G298800, Glyma.05G220500, Glyma.06G221700, Glyma.07G089700, Glyma.08G193900, Glyma.09G022300, Glyma.09G022500, Glyma.09G048900, Glyma.10G009400, Glyma.11G062700, Glyma.12G195600, Glyma.13G306900, Glyma.15G243300, Glyma.16G055900, Glyma.16G210300, Glyma.17G080500, Glyma.17G125400, Glyma.18G055500, Glyma.18G297200, Glyma.19G003600, Glyma.19G014600, Glyma.20G214200
2VS11	Up	GO:0004601	0.000198528	0.186517	10	164	peroxidase activity	molecular_function	Glyma.02G233800, Glyma.06G221700, Glyma.09G022300, Glyma.09G022500, Glyma.10G009400, Glyma.12G195600, Glyma.13G306900, Glyma.16G055900, Glyma.18G055500, Glyma.20G214200
2VS11	Up	GO:0006979	0.000353357	0.221319	10	178	response to oxidative stress	biological_process	Glyma.02G233800, Glyma.06G221700, Glyma.09G022300, Glyma.09G022500, Glyma.10G009400, Glyma.12G195600, Glyma.13G306900, Glyma.16G055900, Glyma.18G055500, Glyma.20G214200
2VS11	Up	GO:0007275	0.000622731	0.262316	5	44	multicellular organismal development	biological_process	Glyma.01G195900, Glyma.05G108600, Glyma.14G089200, Glyma.17G158300, Glyma.18G244600
2VS11	Up	GO:0016705	0.000698021	0.262316	13	293	oxidoreductase activity, acting on paired donors, with incorporation or reduction of molecular oxygen	molecular_function	Glyma.02G298800, Glyma.05G220500, Glyma.07G089700, Glyma.08G193900, Glyma.09G048900, Glyma.11G062700, Glyma.15G243300, Glyma.16G210300, Glyma.17G080500, Glyma.17G125400, Glyma.18G297200, Glyma.19G003600, Glyma.19G014600
2VS11	Up	GO:0016020	0.001275	0.364408	22	690	membrane	cellular_component	Glyma.03G168000, Glyma.03G175300, Glyma.04G082700, Glyma.04G192500, Glyma.06G112100, Glyma.06G149500, Glyma.06G173300, Glyma.06G324300, Glyma.07G101800, Glyma.09G019600, Glyma.09G091100, Glyma.09G102800, Glyma.09G146800, Glyma.10G239000, Glyma.12G191500, Glyma.14G148100, Glyma.14G148300, Glyma.15G274600, Glyma.17G136400, Glyma.17G148600, Glyma.18G133500, Glyma.20G056900
2VS11	Up	GO:0005215	0.00154721	0.364408	11	244	transporter activity	molecular_function	Glyma.04G003200, Glyma.04G082700, Glyma.04G192500, Glyma.06G173300, Glyma.08G203000, Glyma.10G005400, Glyma.10G221100, Glyma.11G224100, Glyma.18G133500, Glyma.20G056900, Glyma.20G170400
2VS11	Up	GO:0008356	0.00174544	0.364408	2	4	asymmetric cell division	biological_process	Glyma.05G105600, Glyma.11G047700
2VS11	Up	GO:0009956	0.00174544	0.364408	2	4	radial pattern formation	biological_process	Glyma.05G105600, Glyma.11G047700
2VS11	Up	GO:0016702	0.0019988	0.375575	5	56	oxidoreductase activity, acting on single donors with incorporation of molecular oxygen, incorporation of two atoms of oxygen	molecular_function	Glyma.07G196800, Glyma.08G189200, Glyma.08G189500, Glyma.08G189600, Glyma.16G037600
2VS11	Up	GO:0005506	0.00267605	0.457119	13	347	iron ion binding	molecular_function	Glyma.02G298800, Glyma.05G220500, Glyma.07G089700, Glyma.08G193900, Glyma.09G048900, Glyma.11G062700, Glyma.15G243300, Glyma.16G210300, Glyma.17G080500, Glyma.17G125400, Glyma.18G297200, Glyma.19G003600, Glyma.19G014600
2VS11	Up	GO:0003700	0.0034933	0.546993	24	840	transcription factor activity, sequence-specific DNA binding	molecular_function	Glyma.01G195900, Glyma.03G128200, Glyma.03G135800, Glyma.03G145800, Glyma.03G162500, Glyma.04G173500, Glyma.04G254800, Glyma.05G033400, Glyma.05G105600, Glyma.05G108600, Glyma.06G024900, Glyma.06G086400, Glyma.06G107300, Glyma.07G017300, Glyma.09G231600, Glyma.10G029600, Glyma.11G047700, Glyma.14G089200, Glyma.17G097900, Glyma.17G132700, Glyma.17G158300, Glyma.18G117100, Glyma.18G244600, XLOC_022…
2VS11	Up	GO:0005345	0.00426472	0.572386	2	6	purine nucleobase transmembrane transporter activity	molecular_function	Glyma.04G192500, Glyma.06G173300
2VS11	Up	GO:0006863	0.00426472	0.572386	2	6	purine nucleobase transport	biological_process	Glyma.04G192500, Glyma.06G173300
2VS11	Up	GO:0006810	0.00712692	0.841805	13	380	transport	biological_process	Glyma.01G008200, Glyma.04G003200, Glyma.04G082700, Glyma.04G192500, Glyma.06G173300, Glyma.08G203000, Glyma.10G005400, Glyma.10G221100, Glyma.11G224100, Glyma.17G148600, Glyma.18G133500, Glyma.20G056900, Glyma.20G170400
2VS11	Up	GO:0015238	0.00745432	0.841805	5	79	drug transmembrane transporter activity	molecular_function	Glyma.09G102800, Glyma.09G146800, Glyma.10G239000, Glyma.15G274600, Glyma.17G136400
2VS11	Up	GO:0006855	0.00783982	0.841805	5	79	drug transmembrane transport	biological_process	Glyma.09G102800, Glyma.09G146800, Glyma.10G239000, Glyma.15G274600, Glyma.17G136400
2VS11	Up	GO:0015297	0.00806412	0.841805	5	81	antiporter activity	molecular_function	Glyma.09G102800, Glyma.09G146800, Glyma.10G239000, Glyma.15G274600, Glyma.17G136400
2VS11	Up	GO:0022857	0.0170822	1	6	134	transmembrane transporter activity	molecular_function	Glyma.04G171800, Glyma.06G112100, Glyma.06G149500, Glyma.06G313500, Glyma.14G148100, Glyma.14G148300
2VS11	Up	GO:0009308	0.0172815	1	2	14	amine metabolic process	biological_process	Glyma.17G019300, Glyma.20G145100
2VS11	Up	GO:0010600	0.0172872	1	1	1	regulation of auxin biosynthetic process	biological_process	XLOC_022764
2VS11	Up	GO:0008131	0.0191327	1	2	15	primary amine oxidase activity	molecular_function	Glyma.17G019300, Glyma.20G145100
2VS11	Up	GO:0005667	0.0224204	1	2	14	transcription factor complex	cellular_component	Glyma.05G033400, Glyma.06G024900
2VS11	Up	GO:0008676	0.0290395	1	1	2	3-deoxy-8-phosphooctulonate synthase activity	molecular_function	Glyma.18G248300
2VS11	Up	GO:0048038	0.0298774	1	2	26	quinone binding	molecular_function	Glyma.17G019300, Glyma.20G145100
2VS11	Up	GO:0009851	0.0304941	1	1	2	auxin biosynthetic process	biological_process	XLOC_022764
2VS11	Up	GO:0016021	0.0307735	1	18	743	integral component of membrane	cellular_component	Glyma.01G008200, Glyma.04G027300, Glyma.04G082700, Glyma.04G102600, Glyma.04G102700, Glyma.04G171800, Glyma.06G313500, Glyma.07G141600, Glyma.07G251900, Glyma.08G182800, Glyma.09G045400, Glyma.09G099500, Glyma.09G176300, Glyma.13G323800, Glyma.16G180800, Glyma.17G022500, Glyma.18G141900, Glyma.20G105900
2VS11	Up	GO:0004803	0.0342139	1	1	2	transposase activity	molecular_function	XLOC_006858
2VS11	Up	GO:0006313	0.0342139	1	1	2	transposition, DNA-mediated	biological_process	XLOC_006858
2VS11	Up	GO:0007623	0.0342767	1	1	2	circadian rhythm	biological_process	XLOC_022764
2VS11	Up	GO:0003824	0.0404008	1	11	379	catalytic activity	molecular_function	Glyma.01G172700, Glyma.03G221400, Glyma.05G075100, Glyma.05G151200, Glyma.06G265700, Glyma.09G269400, Glyma.12G019800, Glyma.12G215800, Glyma.12G234200, Glyma.13G285700, Glyma.17G064600
2VS11	Up	GO:0004650	0.0433599	1	2	25	polygalacturonase activity	molecular_function	Glyma.02G009300, Glyma.10G010000
2VS12	Down	GO:0015979	4.89955e-10	9.20625e-07	13	87	photosynthesis	biological_process	Glyma.02G094900, Glyma.04G241000, Glyma.06G014500, Glyma.06G073600, Glyma.06G321900, Glyma.08G154300, Glyma.09G073900, Glyma.09G090100, Glyma.10G256000, Glyma.10G290700, Glyma.18G046700, Glyma.18G114900, Glyma.U016600
2VS12	Down	GO:0009523	4.51148e-08	4.23854e-05	10	66	photosystem II	cellular_component	Glyma.02G094900, Glyma.04G241000, Glyma.06G014500, Glyma.06G073600, Glyma.08G154300, Glyma.09G073900, Glyma.10G290700, Glyma.18G046700, Glyma.18G114900, XLOC_019823
2VS12	Down	GO:0009654	1.28068e-07	8.0213e-05	8	40	photosystem II oxygen evolving complex	cellular_component	Glyma.02G094900, Glyma.04G241000, Glyma.06G014500, Glyma.06G073600, Glyma.08G154300, Glyma.10G290700, Glyma.18G046700, Glyma.18G114900
2VS12	Down	GO:0009765	1.12766e-05	0.0052972	6	34	photosynthesis, light harvesting	biological_process	Glyma.02G305400, Glyma.07G047600, Glyma.08G074000, Glyma.16G016100, Glyma.18G028400, Glyma.20G212900
2VS12	Down	GO:0005509	7.84758e-05	0.0294912	8	92	calcium ion binding	molecular_function	Glyma.02G094900, Glyma.04G241000, Glyma.06G014500, Glyma.06G073600, Glyma.08G154300, Glyma.10G290700, Glyma.18G046700, Glyma.18G114900
2VS12	Down	GO:0009522	0.000106193	0.0332563	5	33	photosystem I	cellular_component	Glyma.06G321900, Glyma.09G090100, Glyma.10G256000, Glyma.13G357300, Glyma.U016600
2VS12	Down	GO:0042132	0.000709599	0.190477	3	12	fructose 1,6-bisphosphate 1-phosphatase activity	molecular_function	Glyma.07G142700, Glyma.10G225400, Glyma.18G193600
2VS12	Down	GO:0008610	0.00193306	0.405149	4	35	lipid biosynthetic process	biological_process	Glyma.06G058500, Glyma.10G274400, Glyma.12G075100, Glyma.20G115500
2VS12	Down	GO:0009579	0.00194057	0.405149	2	5	thylakoid	cellular_component	Glyma.09G090100, Glyma.U016600
2VS12	Down	GO:0010207	0.00226819	0.426192	2	5	photosystem II assembly	biological_process	Glyma.12G200200, Glyma.13G302100
2VS12	Down	GO:0006633	0.00285716	0.488056	5	64	fatty acid biosynthetic process	biological_process	Glyma.06G058500, Glyma.10G274400, Glyma.12G075100, Glyma.17G069100, Glyma.20G115500
2VS12	Down	GO:0004061	0.00336708	0.527228	2	6	arylformamidase activity	molecular_function	Glyma.10G263400, Glyma.20G126800
2VS12	Down	GO:0004553	0.00409212	0.591469	13	365	hydrolase activity, hydrolyzing O-glycosyl compounds	molecular_function	Glyma.05G109600, Glyma.08G150400, Glyma.10G017000, Glyma.10G251700, Glyma.12G021300, Glyma.12G054400, Glyma.13G218300, Glyma.13G278600, Glyma.17G157400, Glyma.17G252400, Glyma.18G165700, Glyma.19G134800, Glyma.19G223000
2VS12	Down	GO:0016705	0.00556364	0.74672	11	293	oxidoreductase activity, acting on paired donors, with incorporation or reduction of molecular oxygen	molecular_function	Glyma.01G179400, Glyma.02G119600, Glyma.06G176100, Glyma.08G109900, Glyma.10G202400, Glyma.11G060100, Glyma.14G059900, Glyma.17G209100, Glyma.19G015000, Glyma.20G007200, Glyma.20G188000
2VS12	Down	GO:0006073	0.00650662	0.787886	4	49	cellular glucan metabolic process	biological_process	Glyma.05G109600, Glyma.10G251700, Glyma.17G157400, Glyma.18G165700
2VS12	Down	GO:0016762	0.00699532	0.787886	4	50	xyloglucan:xyloglucosyl transferase activity	molecular_function	Glyma.05G109600, Glyma.10G251700, Glyma.17G157400, Glyma.18G165700
2VS12	Down	GO:0005506	0.00714796	0.787886	12	347	iron ion binding	molecular_function	Glyma.01G179400, Glyma.02G119600, Glyma.06G176100, Glyma.08G109900, Glyma.10G202400, Glyma.11G060100, Glyma.14G059900, Glyma.17G069100, Glyma.17G209100, Glyma.19G015000, Glyma.20G007200, Glyma.20G188000
2VS12	Down	GO:0009535	0.00754761	0.787886	3	29	chloroplast thylakoid membrane	cellular_component	XLOC_016679, XLOC_019823, XLOC_042521
2VS12	Down	GO:0019684	0.0080596	0.797052	2	10	photosynthesis, light reaction	biological_process	Glyma.06G217900, XLOC_042521
2VS12	Down	GO:0008152	0.00874215	0.821325	17	583	metabolic process	biological_process	Glyma.01G113200, Glyma.02G002000, Glyma.04G109400, Glyma.06G183900, Glyma.06G247100, Glyma.09G135700, Glyma.09G248400, Glyma.10G281400, Glyma.11G120600, Glyma.12G150400, Glyma.15G140200, Glyma.18G036100, Glyma.18G225000, Glyma.18G265700, Glyma.19G036100, Glyma.19G079000, Glyma.20G107800
2VS12	Down	GO:0009772	0.00977437	0.874573	2	11	photosynthetic electron transport in photosystem II	biological_process	Glyma.06G217900, XLOC_019823
2VS12	Down	GO:0045261	0.0111235	0.950048	2	11	proton-transporting ATP synthase complex, catalytic core F(1)	cellular_component	Glyma.13G204800, XLOC_016679
2VS12	Down	GO:0005215	0.0129468	1	9	244	transporter activity	molecular_function	Glyma.01G081700, Glyma.03G227500, Glyma.10G005300, Glyma.10G296600, Glyma.17G115300, Glyma.17G139400, Glyma.18G299200, Glyma.19G224400, Glyma.20G247400
2VS12	Down	GO:0016168	0.0137463	1	2	13	chlorophyll binding	molecular_function	Glyma.08G281300, XLOC_019823
2VS12	Down	GO:0045017	0.0152436	1	1	1	glycerolipid biosynthetic process	biological_process	Glyma.12G114900
2VS12	Down	GO:0010468	0.015317	1	1	1	regulation of gene expression	biological_process	XLOC_040788
2VS12	Down	GO:0030955	0.0155342	1	1	1	potassium ion binding	molecular_function	XLOC_009630
2VS12	Down	GO:0004805	0.0155383	1	1	1	trehalose-phosphatase activity	molecular_function	XLOC_045925
2VS12	Down	GO:0046933	0.0174634	1	2	14	proton-transporting ATP synthase activity, rotational mechanism	molecular_function	Glyma.13G204800, XLOC_016679
2VS12	Down	GO:0005992	0.0308426	1	1	2	trehalose biosynthetic process	biological_process	XLOC_045925
2VS12	Down	GO:0006090	0.0308492	1	1	2	pyruvate metabolic process	biological_process	Glyma.07G253700
2VS12	Down	GO:0050242	0.0308492	1	1	2	pyruvate, phosphate dikinase activity	molecular_function	Glyma.07G253700
2VS12	Down	GO:0015986	0.0380153	1	2	21	ATP synthesis coupled proton transport	biological_process	Glyma.13G204800, XLOC_016679
2VS12	Down	GO:0043231	0.0428366	1	1	3	intracellular membrane-bounded organelle	cellular_component	Glyma.09G152100
2VS12	Down	GO:0005975	0.0447892	1	7	212	carbohydrate metabolic process	biological_process	Glyma.05G109600, Glyma.07G142700, Glyma.10G225400, Glyma.10G251700, Glyma.17G157400, Glyma.18G165700, Glyma.18G193600
2VS12	Down	GO:0006508	0.0448762	1	7	211	proteolysis	biological_process	Glyma.02G215700, Glyma.05G132000, Glyma.06G272800, Glyma.07G205400, Glyma.14G085600, Glyma.19G045800, Glyma.19G196700
2VS12	Down	GO:0034599	0.0449528	1	1	3	cellular response to oxidative stress	biological_process	Glyma.12G178800
2VS12	Down	GO:0071486	0.0449528	1	1	3	cellular response to high light intensity	biological_process	Glyma.12G178800
2VS12	Down	GO:0046912	0.0453462	1	1	3	transferase activity, transferring acyl groups, acyl groups converted into alkyl on transfer	molecular_function	Glyma.15G140200
2VS12	Down	GO:0005875	0.0455383	1	2	23	microtubule associated complex	cellular_component	Glyma.06G270500, Glyma.07G138900
2VS12	Down	GO:0005618	0.0456188	1	5	128	cell wall	cellular_component	Glyma.05G109600, Glyma.09G077100, Glyma.10G251700, Glyma.17G157400, Glyma.18G165700
2VS12	Down	GO:0030604	0.0459024	1	1	3	1-deoxy-D-xylulose-5-phosphate reductoisomerase activity	molecular_function	Glyma.16G089000
2VS12	Down	GO:0016310	0.0459165	1	1	3	phosphorylation	biological_process	Glyma.07G253700
2VS12	Down	GO:0046872	0.0478004	1	6	173	metal ion binding	molecular_function	Glyma.11G130300, Glyma.12G054700, Glyma.12G178800, Glyma.16G089000, Glyma.20G054000, XLOC_019823
2VS12	Up	GO:0020037	1.32676e-08	2.49298e-05	26	455	heme binding	molecular_function	Glyma.02G233800, Glyma.02G298800, Glyma.05G220500, Glyma.06G221700, Glyma.08G181500, Glyma.08G193900, Glyma.09G022300, Glyma.09G057100, Glyma.09G160900, Glyma.09G279100, Glyma.10G009400, Glyma.10G234700, Glyma.11G062700, Glyma.12G195600, Glyma.15G050800, Glyma.16G055900, Glyma.16G210300, Glyma.17G125400, Glyma.18G055500, Glyma.18G297200, Glyma.19G003600, Glyma.19G014600, Glyma.19G090800, Glyma.20…
2VS12	Up	GO:0004601	9.31604e-06	0.00875242	12	164	peroxidase activity	molecular_function	Glyma.02G233800, Glyma.06G221700, Glyma.07G130800, Glyma.08G181500, Glyma.09G022300, Glyma.09G057100, Glyma.10G009400, Glyma.12G195600, Glyma.15G050800, Glyma.16G055900, Glyma.18G055500, Glyma.20G029600
2VS12	Up	GO:0016705	1.96891e-05	0.012332	16	293	oxidoreductase activity, acting on paired donors, with incorporation or reduction of molecular oxygen	molecular_function	Glyma.02G298800, Glyma.05G220500, Glyma.08G193900, Glyma.09G160900, Glyma.09G279100, Glyma.10G234700, Glyma.11G062700, Glyma.16G210300, Glyma.17G125400, Glyma.18G297200, Glyma.19G003600, Glyma.19G014600, Glyma.19G090800, Glyma.20G147900, Glyma.20G159700, Glyma.U000100
2VS12	Up	GO:0006855	3.74775e-05	0.017605	8	79	drug transmembrane transport	biological_process	Glyma.02G090100, Glyma.09G102800, Glyma.09G146800, Glyma.10G239000, Glyma.15G274600, Glyma.17G136400, Glyma.17G136500, XLOC_038793
2VS12	Up	GO:0005506	0.000117599	0.0441936	16	347	iron ion binding	molecular_function	Glyma.02G298800, Glyma.05G220500, Glyma.08G193900, Glyma.09G160900, Glyma.09G279100, Glyma.10G234700, Glyma.11G062700, Glyma.16G210300, Glyma.17G125400, Glyma.18G297200, Glyma.19G003600, Glyma.19G014600, Glyma.19G090800, Glyma.20G147900, Glyma.20G159700, Glyma.U000100
2VS12	Up	GO:0015238	0.000248258	0.0750029	7	79	drug transmembrane transporter activity	molecular_function	Glyma.02G090100, Glyma.09G102800, Glyma.09G146800, Glyma.10G239000, Glyma.15G274600, Glyma.17G136400, Glyma.17G136500
2VS12	Up	GO:0015297	0.000279415	0.0750029	7	81	antiporter activity	molecular_function	Glyma.02G090100, Glyma.09G102800, Glyma.09G146800, Glyma.10G239000, Glyma.15G274600, Glyma.17G136400, Glyma.17G136500
2VS12	Up	GO:0006979	0.000416401	0.0978021	10	178	response to oxidative stress	biological_process	Glyma.02G233800, Glyma.06G221700, Glyma.08G181500, Glyma.09G022300, Glyma.09G057100, Glyma.10G009400, Glyma.12G195600, Glyma.15G050800, Glyma.16G055900, Glyma.18G055500
2VS12	Up	GO:0008356	0.00184208	0.346126	2	4	asymmetric cell division	biological_process	Glyma.05G105600, Glyma.11G047700
2VS12	Up	GO:0009956	0.00184208	0.346126	2	4	radial pattern formation	biological_process	Glyma.05G105600, Glyma.11G047700
2VS12	Up	GO:0016702	0.00221995	0.379071	5	56	oxidoreductase activity, acting on single donors with incorporation of molecular oxygen, incorporation of two atoms of oxygen	molecular_function	Glyma.07G196800, Glyma.08G189200, Glyma.08G189500, Glyma.08G189600, Glyma.16G037600
2VS12	Up	GO:0009735	0.00242089	0.379071	2	5	response to cytokinin	biological_process	XLOC_025578, XLOC_038793
2VS12	Up	GO:0043565	0.00307667	0.444697	4	38	sequence-specific DNA binding	molecular_function	Glyma.05G105600, Glyma.11G047700, XLOC_002575, XLOC_028335
2VS12	Up	GO:0048364	0.00344875	0.462872	2	6	root development	biological_process	XLOC_025578, XLOC_028335
2VS12	Up	GO:0006873	0.00591634	0.6948	2	8	cellular ion homeostasis	biological_process	Glyma.04G027300, Glyma.10G229300
2VS12	Up	GO:0008308	0.00591634	0.6948	2	8	voltage-gated anion channel activity	molecular_function	Glyma.04G027300, Glyma.10G229300
2VS12	Up	GO:0016020	0.00793569	0.877127	20	690	membrane	cellular_component	Glyma.02G090100, Glyma.03G168000, Glyma.03G175300, Glyma.04G082700, Glyma.06G112100, Glyma.06G149500, Glyma.09G102800, Glyma.09G146800, Glyma.10G239000, Glyma.11G042000, Glyma.12G191500, Glyma.14G148100, Glyma.15G274600, Glyma.16G218100, Glyma.17G136400, Glyma.17G136500, Glyma.17G148600, Glyma.18G133500, Glyma.19G176000, XLOC_038793
2VS12	Up	GO:0006810	0.00866306	0.900391	13	380	transport	biological_process	Glyma.01G008200, Glyma.02G073700, Glyma.04G082700, Glyma.06G036200, Glyma.10G005400, Glyma.10G221100, Glyma.11G042000, Glyma.11G224100, Glyma.13G118800, Glyma.13G118900, Glyma.17G148600, Glyma.18G133500, Glyma.20G170400
2VS12	Up	GO:0003700	0.00910454	0.900391	23	840	transcription factor activity, sequence-specific DNA binding	molecular_function	Glyma.01G232000, Glyma.03G128200, Glyma.03G135800, Glyma.03G142400, Glyma.04G173500, Glyma.04G254800, Glyma.05G033400, Glyma.05G105600, Glyma.06G205800, Glyma.07G017300, Glyma.08G011300, Glyma.08G320200, Glyma.09G231600, Glyma.10G029600, Glyma.10G067000, Glyma.10G092100, Glyma.11G047700, Glyma.13G102800, Glyma.17G097900, Glyma.17G132700, Glyma.18G052500, XLOC_002575, XLOC_028335
2VS12	Up	GO:0016021	0.0106719	1	20	743	integral component of membrane	cellular_component	Glyma.01G008200, Glyma.04G027300, Glyma.04G082700, Glyma.04G102600, Glyma.04G102700, Glyma.06G192100, Glyma.07G251900, Glyma.09G099500, Glyma.09G134900, Glyma.10G229300, Glyma.11G042000, Glyma.11G195200, Glyma.13G118800, Glyma.13G118900, Glyma.13G323800, Glyma.16G180800, Glyma.17G224000, Glyma.18G141900, XLOC_025578, XLOC_038793
2VS12	Up	GO:0005215	0.0163556	1	9	244	transporter activity	molecular_function	Glyma.02G073700, Glyma.04G082700, Glyma.06G036200, Glyma.10G005400, Glyma.10G221100, Glyma.11G042000, Glyma.11G224100, Glyma.18G133500, Glyma.20G170400
2VS12	Up	GO:0008757	0.0174076	1	1	1	S-adenosylmethionine-dependent methyltransferase activity	molecular_function	XLOC_025578
2VS12	Up	GO:0010289	0.0174076	1	1	1	homogalacturonan biosynthetic process	biological_process	XLOC_025578
2VS12	Up	GO:0003825	0.0177575	1	1	1	alpha,alpha-trehalose-phosphate synthase (UDP-forming) activity	molecular_function	XLOC_038060
2VS12	Up	GO:0008559	0.017785	1	1	1	xenobiotic-transporting ATPase activity	molecular_function	XLOC_038793
2VS12	Up	GO:0042908	0.017785	1	1	1	xenobiotic transport	biological_process	XLOC_038793
2VS12	Up	GO:0042335	0.017785	1	1	1	cuticle development	biological_process	XLOC_028335
2VS12	Up	GO:0009308	0.0181674	1	2	14	amine metabolic process	biological_process	Glyma.17G019300, Glyma.20G145100
2VS12	Up	GO:0006952	0.0198196	1	4	71	defense response	biological_process	Glyma.06G249800, Glyma.15G145900, Glyma.15G217100, Glyma.15G218900
2VS12	Up	GO:0008131	0.0200903	1	2	15	primary amine oxidase activity	molecular_function	Glyma.17G019300, Glyma.20G145100
2VS12	Up	GO:0003677	0.0231296	1	23	925	DNA binding	molecular_function	Glyma.02G070000, Glyma.03G007900, Glyma.03G130600, Glyma.04G078600, Glyma.04G182600, Glyma.06G080200, Glyma.06G195500, Glyma.06G205800, Glyma.07G092000, Glyma.07G229600, Glyma.08G041500, Glyma.09G149900, Glyma.09G184100, Glyma.09G231600, Glyma.10G241300, Glyma.10G241400, Glyma.13G102800, Glyma.13G329000, Glyma.14G217700, Glyma.17G132700, Glyma.18G260500, Glyma.19G180300, Glyma.20G175500
2VS12	Up	GO:0006351	0.0239898	1	6	142	transcription, DNA-templated	biological_process	Glyma.03G128200, Glyma.03G142400, Glyma.04G254800, Glyma.10G092100, XLOC_002575, XLOC_028335
2VS12	Up	GO:0048767	0.0279258	1	1	2	root hair elongation	biological_process	XLOC_038793
2VS12	Up	GO:0048038	0.0312214	1	2	26	quinone binding	molecular_function	Glyma.17G019300, Glyma.20G145100
2VS12	Up	GO:0016491	0.0312716	1	18	699	oxidoreductase activity	molecular_function	Glyma.02G010100, Glyma.04G121700, Glyma.05G124800, Glyma.07G130800, Glyma.08G039300, Glyma.08G169700, Glyma.08G169900, Glyma.08G351900, Glyma.09G189200, Glyma.10G010700, Glyma.11G035300, Glyma.13G036200, Glyma.13G222100, Glyma.16G153400, Glyma.17G037300, Glyma.17G049900, Glyma.19G008600, Glyma.19G188100
2VS12	Up	GO:0050664	0.0334261	1	2	17	oxidoreductase activity, acting on NAD(P)H, oxygen as acceptor	molecular_function	Glyma.07G130800, Glyma.20G029600
2VS12	Up	GO:0005992	0.0351101	1	1	2	trehalose biosynthetic process	biological_process	XLOC_038060
2VS12	Up	GO:0048765	0.0352139	1	1	2	root hair cell differentiation	biological_process	XLOC_028335
2VS12	Up	GO:0009630	0.0389067	1	1	3	gravitropism	biological_process	XLOC_038793
2VS12	Up	GO:0005802	0.0393589	1	1	3	trans-Golgi network	cellular_component	XLOC_025578
2VS12	Up	GO:0003824	0.0466779	1	11	379	catalytic activity	molecular_function	Glyma.01G172700, Glyma.03G221400, Glyma.05G075100, Glyma.12G019800, Glyma.12G215800, Glyma.12G234200, Glyma.13G285700, Glyma.17G064600, Glyma.18G018100, Glyma.18G220500, XLOC_037011
2VS12	Up	GO:0048367	0.0481368	1	1	3	shoot system development	biological_process	XLOC_025578
2VS12	Up	GO:0010328	0.048727	1	1	3	auxin influx transmembrane transporter activity	molecular_function	XLOC_038793
2VS12	Up	GO:0010540	0.048727	1	1	3	basipetal auxin transport	biological_process	XLOC_038793
2VS12	Up	GO:0010541	0.048727	1	1	3	acropetal auxin transport	biological_process	XLOC_038793
2VS12	Up	GO:0060919	0.048727	1	1	3	auxin influx	biological_process	XLOC_038793
3VS4	Down	GO:0005886	4.28378e-05	0.0804923	3	77	plasma membrane	cellular_component	XLOC_000412, XLOC_019195, XLOC_026551
3VS4	Down	GO:0044419	0.000971129	0.374579	1	1	interspecies interaction between organisms	biological_process	XLOC_019195
3VS4	Down	GO:0030665	0.000973127	0.374579	1	1	clathrin-coated vesicle membrane	cellular_component	XLOC_025546
3VS4	Down	GO:0006101	0.000996751	0.374579	1	1	citrate metabolic process	biological_process	XLOC_026551
3VS4	Down	GO:0048027	0.000996751	0.374579	1	1	mRNA 5'-UTR binding	molecular_function	XLOC_026551
3VS4	Down	GO:0010287	0.00174269	0.481753	1	2	plastoglobule	cellular_component	XLOC_020313
3VS4	Down	GO:0030131	0.00190127	0.481753	1	2	clathrin adaptor complex	cellular_component	XLOC_025546
3VS4	Down	GO:0003994	0.00205111	0.481753	1	2	aconitate hydratase activity	molecular_function	XLOC_026551
3VS4	Down	GO:0031929	0.0050424	0.966434	1	5	TOR signaling	biological_process	Glyma.09G278700
3VS4	Down	GO:0016772	0.00514334	0.966434	1	5	transferase activity, transferring phosphorus-containing groups	molecular_function	XLOC_020313
3VS4	Down	GO:0009651	0.00665097	1	1	7	response to salt stress	biological_process	XLOC_026551
3VS4	Down	GO:0006102	0.00728857	1	1	7	isocitrate metabolic process	biological_process	XLOC_026551
3VS4	Down	GO:0004652	0.00841354	1	1	8	polynucleotide adenylyltransferase activity	molecular_function	Glyma.09G107600
3VS4	Down	GO:0005773	0.00930138	1	1	10	vacuole	cellular_component	XLOC_026551
3VS4	Down	GO:0004523	0.0113886	1	1	13	RNA-DNA hybrid ribonuclease activity	molecular_function	XLOC_004560
3VS4	Down	GO:0046872	0.0114931	1	2	173	metal ion binding	molecular_function	XLOC_009033, XLOC_019195
3VS4	Down	GO:0009941	0.0116954	1	1	13	chloroplast envelope	cellular_component	XLOC_020351
3VS4	Down	GO:0016740	0.0122601	1	1	16	transferase activity	molecular_function	Glyma.09G184300
3VS4	Down	GO:0005794	0.0123488	1	1	13	Golgi apparatus	cellular_component	XLOC_025546
3VS4	Down	GO:0048046	0.0130499	1	1	14	apoplast	cellular_component	XLOC_026551
3VS4	Down	GO:0042742	0.0139769	1	1	15	defense response to bacterium	biological_process	XLOC_019195
3VS4	Down	GO:0051539	0.0172565	1	1	19	4 iron, 4 sulfur cluster binding	molecular_function	XLOC_026551
3VS4	Down	GO:0006099	0.0220084	1	1	23	tricarboxylic acid cycle	biological_process	XLOC_026551
3VS4	Down	GO:0008234	0.0221008	1	1	25	cysteine-type peptidase activity	molecular_function	Glyma.18G281700
3VS4	Down	GO:0016301	0.0234108	1	1	26	kinase activity	molecular_function	XLOC_020313
3VS4	Down	GO:0004721	0.0236482	1	1	27	phosphoprotein phosphatase activity	molecular_function	XLOC_009033
3VS4	Down	GO:0009506	0.0256526	1	1	29	plasmodesma	cellular_component	XLOC_026551
3VS4	Down	GO:0005829	0.0273092	1	1	32	cytosol	cellular_component	XLOC_026551
3VS4	Down	GO:0008565	0.0317852	1	1	32	protein transporter activity	molecular_function	XLOC_025546
3VS4	Down	GO:0016887	0.0454885	1	1	47	ATPase activity	molecular_function	XLOC_020351
3VS4	Up	GO:0043565	0.00120004	0.733622	2	38	sequence-specific DNA binding	molecular_function	XLOC_002575, XLOC_028335
3VS4	Up	GO:0006772	0.00135829	0.733622	1	1	thiamine metabolic process	biological_process	XLOC_015695
3VS4	Up	GO:0044715	0.00135829	0.733622	1	1	8-oxo-dGDP phosphatase activity	molecular_function	XLOC_015695
3VS4	Up	GO:0042335	0.00156173	0.733622	1	1	cuticle development	biological_process	XLOC_028335
3VS4	Up	GO:0009626	0.00256386	0.93103	1	2	plant-type hypersensitive response	biological_process	XLOC_037205
3VS4	Up	GO:0048765	0.00297295	0.93103	1	2	root hair cell differentiation	biological_process	XLOC_028335
3VS4	Up	GO:0043481	0.00535529	1	1	4	anthocyanin accumulation in tissues in response to UV light	biological_process	XLOC_028335
3VS4	Up	GO:0048364	0.00806287	1	1	6	root development	biological_process	XLOC_028335
3VS4	Up	GO:0008097	0.00824148	1	1	6	5S rRNA binding	molecular_function	XLOC_042614
3VS4	Up	GO:0004619	0.00955557	1	1	7	phosphoglycerate mutase activity	molecular_function	Glyma.05G180500
3VS4	Up	GO:0006351	0.0155617	1	2	142	transcription, DNA-templated	biological_process	XLOC_002575, XLOC_028335
3VS4	Up	GO:0043531	0.0185827	1	2	152	ADP binding	molecular_function	Glyma.03G054100, XLOC_037205
3VS4	Up	GO:0050664	0.0248124	1	1	17	oxidoreductase activity, acting on NAD(P)H, oxygen as acceptor	molecular_function	Glyma.20G029600
3VS4	Up	GO:0003700	0.0249074	1	4	840	transcription factor activity, sequence-specific DNA binding	molecular_function	Glyma.08G011300, Glyma.08G261500, XLOC_002575, XLOC_028335
3VS4	Up	GO:0003682	0.0348242	1	1	28	chromatin binding	molecular_function	XLOC_029250
3VS4	Up	GO:0008483	0.0349112	1	1	25	transaminase activity	molecular_function	Glyma.03G040600
3VS4	Up	GO:0015116	0.0367099	1	1	26	sulfate transmembrane transporter activity	molecular_function	Glyma.07G006500
3VS4	Up	GO:0005829	0.0370827	1	1	32	cytosol	cellular_component	XLOC_015695
3VS4	Up	GO:0008272	0.0387823	1	1	28	sulfate transport	biological_process	Glyma.07G006500
3VS4	Up	GO:0008271	0.0406615	1	1	30	secondary active sulfate transmembrane transporter activity	molecular_function	Glyma.07G006500
3VS4	Up	GO:0006096	0.0432411	1	1	32	glycolytic process	biological_process	Glyma.05G180500
3VS5	Down	GO:0015979	2.27702e-11	4.27853e-08	13	87	photosynthesis	biological_process	Glyma.04G014500, Glyma.04G241000, Glyma.05G172300, Glyma.08G304200, Glyma.09G073900, Glyma.09G087700, Glyma.09G090100, Glyma.10G256000, Glyma.10G290700, Glyma.15G208300, Glyma.15G273300, Glyma.18G046700, XLOC_009133
3VS5	Down	GO:0009523	2.56048e-10	2.40557e-07	11	66	photosystem II	cellular_component	Glyma.02G141700, Glyma.04G014500, Glyma.04G241000, Glyma.05G172300, Glyma.08G304200, Glyma.09G073900, Glyma.10G290700, Glyma.15G208300, Glyma.15G273300, Glyma.18G046700, XLOC_034334
3VS5	Down	GO:0009535	1.13848e-09	7.13066e-07	7	29	chloroplast thylakoid membrane	cellular_component	XLOC_003506, XLOC_009133, XLOC_016679, XLOC_026945, XLOC_034214, XLOC_034334, XLOC_042521
3VS5	Down	GO:0009522	7.91123e-07	0.00037163	6	33	photosystem I	cellular_component	Glyma.07G019700, Glyma.09G087700, Glyma.09G090100, Glyma.10G256000, Glyma.13G129500, XLOC_009133
3VS5	Down	GO:0009654	1.31674e-05	0.00494832	6	40	photosystem II oxygen evolving complex	cellular_component	Glyma.04G014500, Glyma.04G241000, Glyma.08G304200, Glyma.10G290700, Glyma.15G273300, Glyma.18G046700
3VS5	Down	GO:0009507	2.62444e-05	0.00821889	7	90	chloroplast	cellular_component	Glyma.02G141700, Glyma.12G178800, XLOC_003506, XLOC_009133, XLOC_014132, XLOC_016679, XLOC_020313
3VS5	Down	GO:0019684	3.51139e-05	0.00942557	3	10	photosynthesis, light reaction	biological_process	Glyma.06G217900, XLOC_026945, XLOC_042521
3VS5	Down	GO:0009765	9.26077e-05	0.0217512	5	34	photosynthesis, light harvesting	biological_process	Glyma.06G194900, Glyma.08G074000, Glyma.13G282000, Glyma.15G179400, Glyma.20G212900
3VS5	Down	GO:0008289	0.000142768	0.0298069	5	38	lipid binding	molecular_function	Glyma.07G076800, Glyma.10G238100, Glyma.12G194400, Glyma.13G308200, XLOC_033852
3VS5	Down	GO:0046872	0.000398387	0.074857	9	173	metal ion binding	molecular_function	Glyma.11G130200, Glyma.11G130300, Glyma.12G178800, XLOC_003506, XLOC_009033, XLOC_009133, XLOC_029298, XLOC_041702, XLOC_042750
3VS5	Down	GO:0042132	0.00054491	0.0930805	3	12	fructose 1,6-bisphosphate 1-phosphatase activity	molecular_function	Glyma.07G142700, Glyma.10G225400, Glyma.18G193600
3VS5	Down	GO:0018298	0.000775543	0.121437	3	18	protein-chromophore linkage	biological_process	Glyma.03G227300, XLOC_009133, XLOC_034334
3VS5	Down	GO:0005509	0.00137627	0.194141	6	92	calcium ion binding	molecular_function	Glyma.04G014500, Glyma.04G241000, Glyma.08G304200, Glyma.10G290700, Glyma.15G273300, Glyma.18G046700
3VS5	Down	GO:0051539	0.0014465	0.194141	3	19	4 iron, 4 sulfur cluster binding	molecular_function	XLOC_009133, XLOC_026551, XLOC_029298
3VS5	Down	GO:0010207	0.00186571	0.233711	2	5	photosystem II assembly	biological_process	Glyma.12G200200, Glyma.13G302100
3VS5	Down	GO:0005886	0.00220153	0.258542	5	77	plasma membrane	cellular_component	XLOC_000412, XLOC_026551, XLOC_026945, XLOC_034214, XLOC_042521
3VS5	Down	GO:0009772	0.00243043	0.268634	2	11	photosynthetic electron transport in photosystem II	biological_process	Glyma.06G217900, XLOC_034334
3VS5	Down	GO:0008152	0.00358772	0.374518	17	583	metabolic process	biological_process	Glyma.01G021900, Glyma.02G002000, Glyma.04G115300, Glyma.04G243000, Glyma.06G247100, Glyma.06G283600, Glyma.07G268500, Glyma.09G135700, Glyma.09G240200, Glyma.09G248400, Glyma.12G009200, Glyma.12G122700, Glyma.12G138800, Glyma.17G176200, Glyma.18G265700, Glyma.19G036100, Glyma.19G079000
3VS5	Down	GO:0016168	0.00378826	0.374639	2	13	chlorophyll binding	molecular_function	XLOC_009133, XLOC_034334
3VS5	Down	GO:0016655	0.00511278	0.480346	2	10	oxidoreductase activity, acting on NAD(P)H, quinone or similar compound as acceptor	molecular_function	XLOC_026945, XLOC_042521
3VS5	Down	GO:0008137	0.00703405	0.62938	2	15	NADH dehydrogenase (ubiquinone) activity	molecular_function	Glyma.13G068600, XLOC_029298
3VS5	Down	GO:0046933	0.00970882	0.663099	2	14	proton-transporting ATP synthase activity, rotational mechanism	molecular_function	XLOC_016679, XLOC_034214
3VS5	Down	GO:0005739	0.00974585	0.663099	5	104	mitochondrion	cellular_component	Glyma.09G089600, XLOC_003506, XLOC_019777, XLOC_026551, XLOC_029298
3VS5	Down	GO:0045263	0.0100451	0.663099	1	2	proton-transporting ATP synthase complex, coupling factor F(o)	cellular_component	XLOC_034214
3VS5	Down	GO:0006633	0.0101691	0.663099	4	64	fatty acid biosynthetic process	biological_process	Glyma.06G058500, Glyma.06G118500, Glyma.10G274400, Glyma.12G075100
3VS5	Down	GO:0009538	0.0113154	0.663099	2	13	photosystem I reaction center	cellular_component	Glyma.07G019700, Glyma.13G129500
3VS5	Down	GO:0008610	0.0122847	0.663099	3	35	lipid biosynthetic process	biological_process	Glyma.06G058500, Glyma.10G274400, Glyma.12G075100
3VS5	Down	GO:0009635	0.0131586	0.663099	1	2	response to herbicide	biological_process	XLOC_034334
3VS5	Down	GO:0010242	0.0131586	0.663099	1	2	oxygen evolving activity	molecular_function	XLOC_034334
3VS5	Down	GO:0030665	0.0132635	0.663099	1	1	clathrin-coated vesicle membrane	cellular_component	XLOC_025546
3VS5	Down	GO:0045017	0.0134813	0.663099	1	1	glycerolipid biosynthetic process	biological_process	Glyma.12G114900
3VS5	Down	GO:0009855	0.0136039	0.663099	1	1	determination of bilateral symmetry	biological_process	XLOC_033852
3VS5	Down	GO:0009880	0.0136039	0.663099	1	1	embryonic pattern specification	biological_process	XLOC_033852
3VS5	Down	GO:0009943	0.0136039	0.663099	1	1	adaxial/abaxial axis specification	biological_process	XLOC_033852
3VS5	Down	GO:0009944	0.0136039	0.663099	1	1	polarity specification of adaxial/abaxial axis	biological_process	XLOC_033852
3VS5	Down	GO:0010014	0.0136039	0.663099	1	1	meristem initiation	biological_process	XLOC_033852
3VS5	Down	GO:0080060	0.0136039	0.663099	1	1	integument development	biological_process	XLOC_033852
3VS5	Down	GO:0006101	0.0137631	0.663099	1	1	citrate metabolic process	biological_process	XLOC_026551
3VS5	Down	GO:0048027	0.0137631	0.663099	1	1	mRNA 5'-UTR binding	molecular_function	XLOC_026551
3VS5	Down	GO:0030955	0.014947	0.685944	1	1	potassium ion binding	molecular_function	XLOC_009630
3VS5	Down	GO:0004805	0.0149674	0.685944	1	1	trehalose-phosphatase activity	molecular_function	XLOC_045925
3VS5	Down	GO:0010287	0.0221089	0.968421	1	2	plastoglobule	cellular_component	XLOC_020313
3VS5	Down	GO:0010072	0.022673	0.968421	1	2	primary shoot apical meristem specification	biological_process	XLOC_033852
3VS5	Down	GO:0015986	0.0226772	0.968421	2	21	ATP synthesis coupled proton transport	biological_process	XLOC_016679, XLOC_034214
3VS5	Down	GO:0030131	0.0254303	1	1	2	clathrin adaptor complex	cellular_component	XLOC_025546
3VS5	Down	GO:0048038	0.0272932	1	2	26	quinone binding	molecular_function	XLOC_026945, XLOC_042521
3VS5	Down	GO:0003994	0.0285586	1	1	2	aconitate hydratase activity	molecular_function	XLOC_026551
3VS5	Down	GO:0003856	0.0286117	1	1	2	3-dehydroquinate synthase activity	molecular_function	Glyma.19G020800
3VS5	Down	GO:0006298	0.0293759	1	2	20	mismatch repair	biological_process	Glyma.10G121600, Glyma.14G188900
3VS5	Down	GO:0005992	0.0297449	1	1	2	trehalose biosynthetic process	biological_process	XLOC_045925
3VS5	Down	GO:0006090	0.0297781	1	1	2	pyruvate metabolic process	biological_process	Glyma.07G253700
3VS5	Down	GO:0050242	0.0297781	1	1	2	pyruvate, phosphate dikinase activity	molecular_function	Glyma.07G253700
3VS5	Down	GO:0071949	0.0297781	1	1	2	FAD binding	molecular_function	Glyma.17G174500
3VS5	Down	GO:0045156	0.0343064	1	1	6	electron transporter, transferring electrons within the cyclic electron transport pathway of photosynthesis activity	molecular_function	XLOC_034334
3VS5	Down	GO:0005747	0.0363848	1	1	3	mitochondrial respiratory chain complex I	cellular_component	XLOC_029298
3VS5	Down	GO:0009073	0.037489	1	1	3	aromatic amino acid family biosynthetic process	biological_process	Glyma.19G020800
3VS5	Down	GO:0016301	0.0381558	1	2	26	kinase activity	molecular_function	Glyma.07G253700, XLOC_020313
3VS5	Down	GO:0008864	0.0384559	1	1	3	formyltetrahydrofolate deformylase activity	molecular_function	Glyma.05G060500
3VS5	Down	GO:0009579	0.0392869	1	1	5	thylakoid	cellular_component	Glyma.09G090100
3VS5	Down	GO:0034599	0.0394621	1	1	3	cellular response to oxidative stress	biological_process	Glyma.12G178800
3VS5	Down	GO:0071486	0.0394621	1	1	3	cellular response to high light intensity	biological_process	Glyma.12G178800
3VS5	Down	GO:0016310	0.0443344	1	1	3	phosphorylation	biological_process	Glyma.07G253700
3VS5	Up	GO:0042545	0.00534274	1	3	50	cell wall modification	biological_process	Glyma.01G138000, Glyma.19G212500, Glyma.19G231300
3VS5	Up	GO:0003964	0.00574338	1	3	55	RNA-directed DNA polymerase activity	molecular_function	XLOC_016623, XLOC_019789, XLOC_040846
3VS5	Up	GO:0004601	0.00752327	1	5	164	peroxidase activity	molecular_function	Glyma.12G195500, Glyma.13G306900, Glyma.13G307000, Glyma.20G029600, Glyma.20G214200
3VS5	Up	GO:0006772	0.00779452	1	1	1	thiamine metabolic process	biological_process	XLOC_015695
3VS5	Up	GO:0044715	0.00779452	1	1	1	8-oxo-dGDP phosphatase activity	molecular_function	XLOC_015695
3VS5	Up	GO:0003825	0.00840152	1	1	1	alpha,alpha-trehalose-phosphate synthase (UDP-forming) activity	molecular_function	XLOC_038060
3VS5	Up	GO:0008559	0.00840152	1	1	1	xenobiotic-transporting ATPase activity	molecular_function	XLOC_038793
3VS5	Up	GO:0042335	0.00840152	1	1	1	cuticle development	biological_process	XLOC_028335
3VS5	Up	GO:0042908	0.00840152	1	1	1	xenobiotic transport	biological_process	XLOC_038793
3VS5	Up	GO:0030599	0.00993694	1	3	63	pectinesterase activity	molecular_function	Glyma.01G138000, Glyma.19G212500, Glyma.19G231300
3VS5	Up	GO:0006979	0.0101006	1	5	178	response to oxidative stress	biological_process	Glyma.01G219400, Glyma.12G195500, Glyma.13G306900, Glyma.13G307000, Glyma.20G214200
3VS5	Up	GO:0003712	0.0120982	1	2	22	transcription cofactor activity	molecular_function	Glyma.03G194700, Glyma.19G194300
3VS5	Up	GO:0055085	0.0121945	1	4	111	transmembrane transport	biological_process	Glyma.07G006500, Glyma.08G180400, Glyma.13G118900, XLOC_038793
3VS5	Up	GO:0003700	0.0125647	1	13	840	transcription factor activity, sequence-specific DNA binding	molecular_function	Glyma.03G162500, Glyma.05G108600, Glyma.07G156200, Glyma.08G011300, Glyma.08G261500, Glyma.13G096900, Glyma.13G122800, Glyma.13G227100, Glyma.14G096800, Glyma.14G147500, Glyma.15G135600, Glyma.18G277100, XLOC_028335
3VS5	Up	GO:0048767	0.0135293	1	1	2	root hair elongation	biological_process	XLOC_038793
3VS5	Up	GO:0006952	0.0136063	1	3	71	defense response	biological_process	Glyma.01G165200, Glyma.06G249800, Glyma.15G217100
3VS5	Up	GO:0015074	0.015166	1	4	169	DNA integration	biological_process	XLOC_016623, XLOC_017659, XLOC_038535, XLOC_040846
3VS5	Up	GO:0005992	0.0167125	1	1	2	trehalose biosynthetic process	biological_process	XLOC_038060
3VS5	Up	GO:0048765	0.016733	1	1	2	root hair cell differentiation	biological_process	XLOC_028335
3VS5	Up	GO:0009630	0.0190395	1	1	3	gravitropism	biological_process	XLOC_038793
3VS5	Up	GO:0015116	0.0190534	1	2	26	sulfate transmembrane transporter activity	molecular_function	Glyma.07G006500, Glyma.08G180400
3VS5	Up	GO:0008272	0.0207296	1	2	28	sulfate transport	biological_process	Glyma.07G006500, Glyma.08G180400
3VS5	Up	GO:0020037	0.0213721	1	8	455	heme binding	molecular_function	Glyma.03G160300, Glyma.04G035000, Glyma.05G170400, Glyma.05G220500, Glyma.12G195500, Glyma.13G306900, Glyma.13G307000, Glyma.20G214200
3VS5	Up	GO:0008271	0.022107	1	2	30	secondary active sulfate transmembrane transporter activity	molecular_function	Glyma.07G006500, Glyma.08G180400
3VS5	Up	GO:0006855	0.0225632	1	3	79	drug transmembrane transport	biological_process	Glyma.09G146800, Glyma.17G136500, XLOC_038793
3VS5	Up	GO:0004519	0.0225755	1	2	33	endonuclease activity	molecular_function	XLOC_016623, XLOC_040846
3VS5	Up	GO:0012511	0.0226851	1	1	3	monolayer-surrounded lipid storage body	cellular_component	Glyma.17G122000
3VS5	Up	GO:0010328	0.0234165	1	1	3	auxin influx transmembrane transporter activity	molecular_function	XLOC_038793
3VS5	Up	GO:0010540	0.0234165	1	1	3	basipetal auxin transport	biological_process	XLOC_038793
3VS5	Up	GO:0010541	0.0234165	1	1	3	acropetal auxin transport	biological_process	XLOC_038793
3VS5	Up	GO:0060919	0.0234165	1	1	3	auxin influx	biological_process	XLOC_038793
3VS5	Up	GO:0006810	0.0271793	1	7	380	transport	biological_process	Glyma.08G136700, Glyma.08G203000, Glyma.08G290600, Glyma.11G224100, Glyma.11G228000, Glyma.13G118900, Glyma.17G148600
3VS5	Up	GO:0043481	0.0284673	1	1	4	anthocyanin accumulation in tissues in response to UV light	biological_process	XLOC_028335
3VS5	Up	GO:0010315	0.0308578	1	1	4	auxin efflux	biological_process	XLOC_038793
3VS5	Up	GO:0010329	0.0308578	1	1	4	auxin efflux transmembrane transporter activity	molecular_function	XLOC_038793
3VS5	Up	GO:0000221	0.0331883	1	1	4	vacuolar proton-transporting V-type ATPase, V1 domain	cellular_component	Glyma.16G142600
3VS5	Up	GO:0009733	0.0343095	1	1	5	response to auxin	biological_process	XLOC_038793
3VS5	Up	GO:0009735	0.0373463	1	1	5	response to cytokinin	biological_process	XLOC_038793
3VS5	Up	GO:0005215	0.0386492	1	5	244	transporter activity	molecular_function	Glyma.08G136700, Glyma.08G203000, Glyma.08G290600, Glyma.11G224100, Glyma.11G228000
3VS5	Up	GO:0009926	0.0390021	1	1	5	auxin polar transport	biological_process	XLOC_038793
3VS5	Up	GO:0016020	0.0391845	1	10	690	membrane	cellular_component	Glyma.03G222300, Glyma.07G006500, Glyma.08G180400, Glyma.08G290600, Glyma.09G146800, Glyma.13G227100, Glyma.13G355000, Glyma.17G136500, Glyma.17G148600, XLOC_038793
3VS5	Up	GO:0004654	0.0402962	1	1	5	polyribonucleotide nucleotidyltransferase activity	molecular_function	Glyma.05G005200
3VS5	Up	GO:0016491	0.0409764	1	10	699	oxidoreductase activity	molecular_function	Glyma.01G219400, Glyma.03G187900, Glyma.04G019500, Glyma.04G121700, Glyma.08G039300, Glyma.08G169300, Glyma.15G132600, Glyma.16G153400, Glyma.17G054600, Glyma.20G010900
3VS5	Up	GO:0046961	0.0421271	1	1	6	proton-transporting ATPase activity, rotational mechanism	molecular_function	Glyma.16G142600
3VS5	Up	GO:0048364	0.0438118	1	1	6	root development	biological_process	XLOC_028335
3VS5	Up	GO:0007275	0.0454135	1	2	44	multicellular organismal development	biological_process	Glyma.05G108600, Glyma.13G096900
3VS5	Up	GO:0004867	0.0468354	1	1	10	serine-type endopeptidase inhibitor activity	molecular_function	Glyma.20G205900
3VS5	Up	GO:0004657	0.0493704	1	1	6	proline dehydrogenase activity	molecular_function	Glyma.19G042900
3VS5	Up	GO:0004190	0.0497922	1	4	180	aspartic-type endopeptidase activity	molecular_function	Glyma.15G234300, Glyma.18G048500, XLOC_016623, XLOC_040846
3VS6	Down	GO:0015979	2.44481e-08	4.5938e-05	12	87	photosynthesis	biological_process	Glyma.04G014500, Glyma.05G172300, Glyma.08G304200, Glyma.09G073900, Glyma.09G090100, Glyma.10G256000, Glyma.10G290700, Glyma.13G232500, Glyma.15G253700, Glyma.15G273300, Glyma.18G046700, XLOC_009133
3VS6	Down	GO:0009535	1.70775e-07	0.000160443	6	29	chloroplast thylakoid membrane	cellular_component	XLOC_003506, XLOC_009133, XLOC_016679, XLOC_026945, XLOC_034214, XLOC_042521
3VS6	Down	GO:0009522	2.78296e-07	0.000174306	7	33	photosystem I	cellular_component	Glyma.07G019700, Glyma.08G204800, Glyma.09G090100, Glyma.10G256000, Glyma.13G357300, Glyma.20G144700, XLOC_009133
3VS6	Down	GO:0019684	8.51218e-07	0.00039986	4	10	photosynthesis, light reaction	biological_process	Glyma.04G095000, Glyma.06G217900, XLOC_026945, XLOC_042521
3VS6	Down	GO:0009523	1.47636e-05	0.00554815	8	66	photosystem II	cellular_component	Glyma.04G014500, Glyma.05G172300, Glyma.08G304200, Glyma.09G073900, Glyma.10G290700, Glyma.15G253700, Glyma.15G273300, Glyma.18G046700
3VS6	Down	GO:0009765	5.8823e-05	0.0184214	6	34	photosynthesis, light harvesting	biological_process	Glyma.02G305400, Glyma.07G047600, Glyma.13G282000, Glyma.15G052400, Glyma.15G179400, Glyma.20G212900
3VS6	Down	GO:0009538	7.3959e-05	0.0198527	4	13	photosystem I reaction center	cellular_component	Glyma.07G019700, Glyma.08G204800, Glyma.13G357300, Glyma.20G144700
3VS6	Down	GO:0008289	9.62288e-05	0.0226017	6	38	lipid binding	molecular_function	Glyma.03G016600, Glyma.07G076800, Glyma.10G238100, Glyma.12G194400, Glyma.13G308200, XLOC_033852
3VS6	Down	GO:0009654	0.000120757	0.0252113	6	40	photosystem II oxygen evolving complex	cellular_component	Glyma.04G014500, Glyma.08G304200, Glyma.10G290700, Glyma.15G253700, Glyma.15G273300, Glyma.18G046700
3VS6	Down	GO:0009507	0.000194088	0.0364691	7	90	chloroplast	cellular_component	Glyma.12G178800, XLOC_003506, XLOC_009133, XLOC_014132, XLOC_014230, XLOC_016679, XLOC_020313
3VS6	Down	GO:0046933	0.00115094	0.196602	3	14	proton-transporting ATP synthase activity, rotational mechanism	molecular_function	Glyma.02G184000, XLOC_016679, XLOC_034214
3VS6	Down	GO:0004332	0.00247328	0.387274	3	13	fructose-bisphosphate aldolase activity	molecular_function	Glyma.11G111100, Glyma.11G111400, Glyma.12G037400
3VS6	Down	GO:0008152	0.00306914	0.443609	23	583	metabolic process	biological_process	Glyma.01G021900, Glyma.02G202500, Glyma.04G029000, Glyma.04G115300, Glyma.04G243000, Glyma.06G247100, Glyma.06G283600, Glyma.07G268500, Glyma.08G121900, Glyma.09G135700, Glyma.09G240200, Glyma.10G281400, Glyma.12G122700, Glyma.12G138800, Glyma.13G183200, Glyma.15G157700, Glyma.16G175200, Glyma.17G176200, Glyma.18G265700, Glyma.19G036100, Glyma.19G079000, Glyma.19G218100, Glyma.20G161200
3VS6	Down	GO:0009772	0.00349846	0.469543	2	11	photosynthetic electron transport in photosystem II	biological_process	Glyma.04G095000, Glyma.06G217900
3VS6	Down	GO:0015986	0.00435922	0.546065	3	21	ATP synthesis coupled proton transport	biological_process	Glyma.02G184000, XLOC_016679, XLOC_034214
3VS6	Down	GO:0016020	0.0048147	0.565427	25	690	membrane	cellular_component	Glyma.01G033900, Glyma.01G058600, Glyma.02G301200, Glyma.03G172900, Glyma.04G240000, Glyma.04G240100, Glyma.06G058500, Glyma.06G106200, Glyma.06G118500, Glyma.08G050500, Glyma.08G241600, Glyma.08G281300, Glyma.09G160000, Glyma.10G274400, Glyma.12G020400, Glyma.12G075100, Glyma.12G133700, Glyma.12G170500, Glyma.13G071300, Glyma.13G275400, Glyma.15G236100, Glyma.18G019000, Glyma.19G005900, Glyma.19…
3VS6	Down	GO:0016168	0.00570866	0.630975	2	13	chlorophyll binding	molecular_function	Glyma.08G281300, XLOC_009133
3VS6	Down	GO:0004061	0.00613322	0.636439	2	6	arylformamidase activity	molecular_function	Glyma.10G263400, Glyma.20G126800
3VS6	Down	GO:0015996	0.00643552	0.636439	2	6	chlorophyll catabolic process	biological_process	Glyma.07G096900, Glyma.10G003200
3VS6	Down	GO:0016620	0.00780559	0.733336	3	20	oxidoreductase activity, acting on the aldehyde or oxo group of donors, NAD or NADP as acceptor	molecular_function	Glyma.04G015900, Glyma.16G044900, Glyma.19G106800
3VS6	Down	GO:0006633	0.00842548	0.75388	5	64	fatty acid biosynthetic process	biological_process	Glyma.06G058500, Glyma.06G118500, Glyma.10G274400, Glyma.12G075100, Glyma.17G069100
3VS6	Down	GO:0045263	0.0100203	0.824152	1	2	proton-transporting ATP synthase complex, coupling factor F(o)	cellular_component	XLOC_034214
3VS6	Down	GO:0016655	0.0101722	0.824152	2	10	oxidoreductase activity, acting on NAD(P)H, quinone or similar compound as acceptor	molecular_function	XLOC_026945, XLOC_042521
3VS6	Down	GO:0005886	0.0105267	0.824152	5	77	plasma membrane	cellular_component	XLOC_000412, XLOC_026551, XLOC_026945, XLOC_034214, XLOC_042521
3VS6	Down	GO:0045261	0.0143099	1	2	11	proton-transporting ATP synthase complex, catalytic core F(1)	cellular_component	Glyma.02G184000, XLOC_016679
3VS6	Down	GO:0046872	0.0174126	1	8	173	metal ion binding	molecular_function	Glyma.10G117100, Glyma.11G130200, Glyma.12G178800, Glyma.16G089000, XLOC_003506, XLOC_009033, XLOC_009133, XLOC_041702
3VS6	Down	GO:0016705	0.0183901	1	12	293	oxidoreductase activity, acting on paired donors, with incorporation or reduction of molecular oxygen	molecular_function	Glyma.02G119600, Glyma.02G256800, Glyma.03G030900, Glyma.08G238100, Glyma.11G060100, Glyma.13G262100, Glyma.14G117200, Glyma.18G272300, Glyma.19G015000, Glyma.19G258700, Glyma.20G007200, Glyma.20G018600
3VS6	Down	GO:0030665	0.0197391	1	1	1	clathrin-coated vesicle membrane	cellular_component	XLOC_025546
3VS6	Down	GO:0045017	0.0201273	1	1	1	glycerolipid biosynthetic process	biological_process	Glyma.12G114900
3VS6	Down	GO:0009855	0.0203457	1	1	1	determination of bilateral symmetry	biological_process	XLOC_033852
3VS6	Down	GO:0009880	0.0203457	1	1	1	embryonic pattern specification	biological_process	XLOC_033852
3VS6	Down	GO:0009943	0.0203457	1	1	1	adaxial/abaxial axis specification	biological_process	XLOC_033852
3VS6	Down	GO:0009944	0.0203457	1	1	1	polarity specification of adaxial/abaxial axis	biological_process	XLOC_033852
3VS6	Down	GO:0010014	0.0203457	1	1	1	meristem initiation	biological_process	XLOC_033852
3VS6	Down	GO:0080060	0.0203457	1	1	1	integument development	biological_process	XLOC_033852
3VS6	Down	GO:0006101	0.0206294	1	1	1	citrate metabolic process	biological_process	XLOC_026551
3VS6	Down	GO:0048027	0.0206294	1	1	1	mRNA 5'-UTR binding	molecular_function	XLOC_026551
3VS6	Down	GO:0030955	0.022738	1	1	1	potassium ion binding	molecular_function	XLOC_009630
3VS6	Down	GO:0004805	0.0227743	1	1	1	trehalose-phosphatase activity	molecular_function	XLOC_045925
3VS6	Down	GO:0005506	0.0242082	1	13	347	iron ion binding	molecular_function	Glyma.02G119600, Glyma.02G256800, Glyma.03G030900, Glyma.08G238100, Glyma.11G060100, Glyma.13G262100, Glyma.14G117200, Glyma.17G069100, Glyma.18G272300, Glyma.19G015000, Glyma.19G258700, Glyma.20G007200, Glyma.20G018600
3VS6	Down	GO:0042132	0.0254553	1	2	12	fructose 1,6-bisphosphate 1-phosphatase activity	molecular_function	Glyma.07G142700, Glyma.18G193600
3VS6	Down	GO:0018298	0.0270866	1	2	18	protein-chromophore linkage	biological_process	Glyma.03G227300, XLOC_009133
3VS6	Down	GO:0009058	0.0315045	1	6	114	biosynthetic process	biological_process	Glyma.05G001000, Glyma.07G258500, Glyma.09G070500, Glyma.11G028200, Glyma.13G001200, Glyma.17G015600
3VS6	Down	GO:0010287	0.0315627	1	1	2	plastoglobule	cellular_component	XLOC_020313
3VS6	Down	GO:0010072	0.0325648	1	1	2	primary shoot apical meristem specification	biological_process	XLOC_033852
3VS6	Down	GO:0006801	0.0344143	1	2	14	superoxide metabolic process	biological_process	Glyma.10G117100, Glyma.12G178800
3VS6	Down	GO:0005509	0.0349158	1	5	92	calcium ion binding	molecular_function	Glyma.04G014500, Glyma.08G304200, Glyma.10G290700, Glyma.15G273300, Glyma.18G046700
3VS6	Down	GO:0008610	0.0353681	1	3	35	lipid biosynthetic process	biological_process	Glyma.06G058500, Glyma.10G274400, Glyma.12G075100
3VS6	Down	GO:0006508	0.0372721	1	9	211	proteolysis	biological_process	Glyma.02G215700, Glyma.05G109400, Glyma.05G132000, Glyma.07G205400, Glyma.14G085600, Glyma.16G144700, Glyma.19G007800, Glyma.19G045800, Glyma.19G196700
3VS6	Down	GO:0030131	0.0374569	1	1	2	clathrin adaptor complex	cellular_component	XLOC_025546
3VS6	Down	GO:0008360	0.0381085	1	1	2	regulation of cell shape	biological_process	XLOC_029769
3VS6	Down	GO:0000175	0.0422973	1	1	2	3'-5'-exoribonuclease activity	molecular_function	Glyma.19G005800
3VS6	Down	GO:0004077	0.0423247	1	1	2	biotin-[acetyl-CoA-carboxylase] ligase activity	molecular_function	Glyma.06G109600
3VS6	Down	GO:0004852	0.0423368	1	1	2	uroporphyrinogen-III synthase activity	molecular_function	Glyma.04G037000
3VS6	Down	GO:0005739	0.0423414	1	5	104	mitochondrion	cellular_component	Glyma.09G089600, Glyma.13G141500, XLOC_003506, XLOC_019777, XLOC_026551
3VS6	Down	GO:0003994	0.042994	1	1	2	aconitate hydratase activity	molecular_function	XLOC_026551
3VS6	Down	GO:0003856	0.0430878	1	1	2	3-dehydroquinate synthase activity	molecular_function	Glyma.19G020800
3VS6	Down	GO:0051539	0.0431649	1	2	19	4 iron, 4 sulfur cluster binding	molecular_function	XLOC_009133, XLOC_026551
3VS6	Down	GO:0043565	0.0432197	1	3	38	sequence-specific DNA binding	molecular_function	Glyma.01G044600, Glyma.08G295800, Glyma.09G241800
3VS6	Down	GO:0005992	0.04509	1	1	2	trehalose biosynthetic process	biological_process	XLOC_045925
3VS6	Down	GO:0071949	0.0451485	1	1	2	FAD binding	molecular_function	Glyma.17G174500
3VS6	Down	GO:0009521	0.0453601	1	1	4	photosystem	cellular_component	Glyma.08G281300
3VS6	Down	GO:0009767	0.0453601	1	1	4	photosynthetic electron transport chain	biological_process	Glyma.08G281300
3VS6	Down	GO:0048038	0.0495981	1	2	26	quinone binding	molecular_function	XLOC_026945, XLOC_042521
3VS6	Up	GO:0004867	0.000927221	0.886928	2	10	serine-type endopeptidase inhibitor activity	molecular_function	Glyma.18G231400, Glyma.20G205900
3VS6	Up	GO:0004601	0.000944043	0.886928	6	164	peroxidase activity	molecular_function	Glyma.07G130800, Glyma.08G181500, Glyma.13G307000, Glyma.18G055500, Glyma.20G029600, Glyma.20G214200
3VS6	Up	GO:0050664	0.00698983	1	2	17	oxidoreductase activity, acting on NAD(P)H, oxygen as acceptor	molecular_function	Glyma.07G130800, Glyma.20G029600
3VS6	Up	GO:0006772	0.00720267	1	1	1	thiamine metabolic process	biological_process	XLOC_015695
3VS6	Up	GO:0044715	0.00720267	1	1	1	8-oxo-dGDP phosphatase activity	molecular_function	XLOC_015695
3VS6	Up	GO:0006979	0.00744143	1	5	178	response to oxidative stress	biological_process	Glyma.01G219400, Glyma.08G181500, Glyma.13G307000, Glyma.18G055500, Glyma.20G214200
3VS6	Up	GO:0042335	0.00772463	1	1	1	cuticle development	biological_process	XLOC_028335
3VS6	Up	GO:0016491	0.0103886	1	11	699	oxidoreductase activity	molecular_function	Glyma.01G219400, Glyma.02G072200, Glyma.03G187900, Glyma.07G130800, Glyma.08G039300, Glyma.09G189200, Glyma.13G222100, Glyma.15G132600, Glyma.16G153400, Glyma.17G054600, Glyma.20G010900
3VS6	Up	GO:0006952	0.0112348	1	3	71	defense response	biological_process	Glyma.01G165200, Glyma.06G249800, Glyma.15G217100
3VS6	Up	GO:0009626	0.0129525	1	1	2	plant-type hypersensitive response	biological_process	XLOC_037205
3VS6	Up	GO:0048765	0.0153901	1	1	2	root hair cell differentiation	biological_process	XLOC_028335
3VS6	Up	GO:0006520	0.0193006	1	2	29	cellular amino acid metabolic process	biological_process	Glyma.02G072200, Glyma.16G153400
3VS6	Up	GO:0043481	0.0264786	1	1	4	anthocyanin accumulation in tissues in response to UV light	biological_process	XLOC_028335
3VS6	Up	GO:0043565	0.0295605	1	2	38	sequence-specific DNA binding	molecular_function	XLOC_002575, XLOC_028335
3VS6	Up	GO:0000221	0.0305455	1	1	4	vacuolar proton-transporting V-type ATPase, V1 domain	cellular_component	Glyma.16G142600
3VS6	Up	GO:0006334	0.0338294	1	1	6	nucleosome assembly	biological_process	XLOC_016517
3VS6	Up	GO:0003700	0.0367914	1	11	840	transcription factor activity, sequence-specific DNA binding	molecular_function	Glyma.01G231200, Glyma.03G162500, Glyma.07G156200, Glyma.08G011300, Glyma.08G261500, Glyma.14G147500, Glyma.15G135600, Glyma.17G158300, Glyma.18G277100, XLOC_002575, XLOC_028335
3VS6	Up	GO:0004654	0.0371592	1	1	5	polyribonucleotide nucleotidyltransferase activity	molecular_function	Glyma.05G005200
3VS6	Up	GO:0004665	0.0374673	1	1	5	prephenate dehydrogenase (NADP+) activity	molecular_function	Glyma.14G055300
3VS6	Up	GO:0006571	0.0374673	1	1	5	tyrosine biosynthetic process	biological_process	Glyma.14G055300
3VS6	Up	GO:0008977	0.0374673	1	1	5	prephenate dehydrogenase activity	molecular_function	Glyma.14G055300
3VS6	Up	GO:0046961	0.0392226	1	1	6	proton-transporting ATPase activity, rotational mechanism	molecular_function	Glyma.16G142600
3VS6	Up	GO:0020037	0.0395441	1	7	455	heme binding	molecular_function	Glyma.04G035000, Glyma.05G170400, Glyma.05G220500, Glyma.08G181500, Glyma.13G307000, Glyma.18G055500, Glyma.20G214200
3VS6	Up	GO:0048364	0.040675	1	1	6	root development	biological_process	XLOC_028335
3VS6	Up	GO:0042545	0.0430121	1	2	50	cell wall modification	biological_process	Glyma.01G138000, Glyma.19G212500
3VS6	Up	GO:0003964	0.0454602	1	2	55	RNA-directed DNA polymerase activity	molecular_function	XLOC_019789, XLOC_038768
3VS6	Up	GO:0004657	0.0454695	1	1	6	proline dehydrogenase activity	molecular_function	Glyma.19G042900
3VS7	Down	GO:0015979	2.1191e-13	3.98179e-10	14	87	photosynthesis	biological_process	Glyma.04G014500, Glyma.04G112800, Glyma.05G172300, Glyma.08G304200, Glyma.09G073900, Glyma.09G087700, Glyma.09G090100, Glyma.10G256000, Glyma.10G290700, Glyma.15G174200, Glyma.15G194300, Glyma.18G046700, Glyma.18G114900, XLOC_009133
3VS7	Down	GO:0009522	1.08948e-11	1.02357e-08	9	33	photosystem I	cellular_component	Glyma.04G112800, Glyma.07G019700, Glyma.08G204800, Glyma.09G087700, Glyma.09G090100, Glyma.10G256000, Glyma.13G129500, Glyma.15G194300, XLOC_009133
3VS7	Down	GO:0009765	3.68545e-09	2.30832e-06	8	34	photosynthesis, light harvesting	biological_process	Glyma.02G305400, Glyma.06G194900, Glyma.08G074000, Glyma.13G282000, Glyma.14G003400, Glyma.15G179400, Glyma.16G145800, Glyma.20G212900
3VS7	Down	GO:0009523	2.19238e-08	1.02987e-05	9	66	photosystem II	cellular_component	Glyma.04G014500, Glyma.05G172300, Glyma.08G304200, Glyma.09G073900, Glyma.10G290700, Glyma.15G174200, Glyma.18G046700, Glyma.18G114900, XLOC_034334
3VS7	Down	GO:0019684	4.0078e-05	0.0150613	3	10	photosynthesis, light reaction	biological_process	Glyma.04G095000, Glyma.06G217900, XLOC_026945
3VS7	Down	GO:0009772	5.55735e-05	0.0151252	3	11	photosynthetic electron transport in photosystem II	biological_process	Glyma.04G095000, Glyma.06G217900, XLOC_034334
3VS7	Down	GO:0009535	5.63473e-05	0.0151252	4	29	chloroplast thylakoid membrane	cellular_component	XLOC_003506, XLOC_009133, XLOC_026945, XLOC_034334
3VS7	Down	GO:0009654	7.97751e-05	0.0187372	5	40	photosystem II oxygen evolving complex	cellular_component	Glyma.04G014500, Glyma.08G304200, Glyma.10G290700, Glyma.18G046700, Glyma.18G114900
3VS7	Down	GO:0042132	0.000321201	0.0618577	3	12	fructose 1,6-bisphosphate 1-phosphatase activity	molecular_function	Glyma.07G142700, Glyma.10G225400, Glyma.18G193600
3VS7	Down	GO:0009538	0.000329206	0.0618577	3	13	photosystem I reaction center	cellular_component	Glyma.07G019700, Glyma.08G204800, Glyma.13G129500
3VS7	Down	GO:0005509	0.000580984	0.0992426	6	92	calcium ion binding	molecular_function	Glyma.04G014500, Glyma.08G304200, Glyma.10G290700, Glyma.17G242400, Glyma.18G046700, Glyma.18G114900
3VS7	Down	GO:0009507	0.00125629	0.187336	5	90	chloroplast	cellular_component	Glyma.12G178800, Glyma.19G251000, XLOC_003506, XLOC_009133, XLOC_014132
3VS7	Down	GO:0010207	0.00131129	0.187336	2	5	photosystem II assembly	biological_process	Glyma.12G200200, Glyma.13G302100
3VS7	Down	GO:0008152	0.0013958	0.187336	16	583	metabolic process	biological_process	Glyma.01G021900, Glyma.03G014300, Glyma.03G221100, Glyma.04G243000, Glyma.06G247100, Glyma.09G135700, Glyma.09G240200, Glyma.10G281400, Glyma.12G009200, Glyma.12G122700, Glyma.13G183200, Glyma.17G176200, Glyma.18G265700, Glyma.19G036100, Glyma.19G079000, Glyma.20G107800
3VS7	Down	GO:0016620	0.00151272	0.189493	3	20	oxidoreductase activity, acting on the aldehyde or oxo group of donors, NAD or NADP as acceptor	molecular_function	Glyma.04G015900, Glyma.06G015900, Glyma.19G106800
3VS7	Down	GO:0015996	0.00201221	0.236309	2	6	chlorophyll catabolic process	biological_process	Glyma.07G096900, Glyma.10G003200
3VS7	Down	GO:0016168	0.00395261	0.43688	2	13	chlorophyll binding	molecular_function	XLOC_009133, XLOC_034334
3VS7	Down	GO:0048544	0.00488837	0.510291	3	30	recognition of pollen	biological_process	Glyma.04G139100, Glyma.08G061000, Glyma.12G198100
3VS7	Down	GO:0006633	0.00572263	0.565938	4	64	fatty acid biosynthetic process	biological_process	Glyma.04G057800, Glyma.06G058500, Glyma.12G075100, Glyma.17G069100
3VS7	Down	GO:0008610	0.00759927	0.713951	3	35	lipid biosynthetic process	biological_process	Glyma.04G057800, Glyma.06G058500, Glyma.12G075100
3VS7	Down	GO:0030665	0.0112209	0.897275	1	1	clathrin-coated vesicle membrane	cellular_component	XLOC_025546
3VS7	Down	GO:0045017	0.0113601	0.897275	1	1	glycerolipid biosynthetic process	biological_process	Glyma.12G114900
3VS7	Down	GO:0006101	0.0115402	0.897275	1	1	citrate metabolic process	biological_process	XLOC_026551
3VS7	Down	GO:0048027	0.0115402	0.897275	1	1	mRNA 5'-UTR binding	molecular_function	XLOC_026551
3VS7	Down	GO:0018298	0.0119382	0.897275	2	18	protein-chromophore linkage	biological_process	XLOC_009133, XLOC_034334
3VS7	Down	GO:0009635	0.0138873	0.966456	1	2	response to herbicide	biological_process	XLOC_034334
3VS7	Down	GO:0010242	0.0138873	0.966456	1	2	oxygen evolving activity	molecular_function	XLOC_034334
3VS7	Down	GO:0051539	0.0164922	1	2	19	4 iron, 4 sulfur cluster binding	molecular_function	XLOC_009133, XLOC_026551
3VS7	Down	GO:0030131	0.0217263	1	1	2	clathrin adaptor complex	cellular_component	XLOC_025546
3VS7	Down	GO:0008360	0.0219618	1	1	2	regulation of cell shape	biological_process	XLOC_029769
3VS7	Down	GO:0003994	0.0237304	1	1	2	aconitate hydratase activity	molecular_function	XLOC_026551
3VS7	Down	GO:0046422	0.024236	1	1	2	violaxanthin de-epoxidase activity	molecular_function	Glyma.19G251000
3VS7	Down	GO:0034599	0.0334132	1	1	3	cellular response to oxidative stress	biological_process	Glyma.12G178800
3VS7	Down	GO:0071486	0.0334132	1	1	3	cellular response to high light intensity	biological_process	Glyma.12G178800
3VS7	Down	GO:0045156	0.0381294	1	1	6	electron transporter, transferring electrons within the cyclic electron transport pathway of photosynthesis activity	molecular_function	XLOC_034334
3VS7	Down	GO:0009579	0.0386386	1	1	5	thylakoid	cellular_component	Glyma.09G090100
3VS7	Down	GO:0046872	0.0415777	1	5	173	metal ion binding	molecular_function	Glyma.07G034800, Glyma.12G178800, XLOC_003506, XLOC_009033, XLOC_009133
3VS7	Down	GO:0006468	0.0446192	1	11	520	protein phosphorylation	biological_process	Glyma.03G166300, Glyma.04G139100, Glyma.06G262400, Glyma.08G061000, Glyma.12G140200, Glyma.12G198100, Glyma.15G021300, Glyma.15G227000, Glyma.16G027200, Glyma.16G065700, Glyma.17G066700
3VS7	Down	GO:0010309	0.0456779	1	1	4	acireductone dioxygenase [iron(II)-requiring] activity	molecular_function	Glyma.20G150100
3VS7	Down	GO:0008839	0.0462185	1	1	4	4-hydroxy-tetrahydrodipicolinate reductase	molecular_function	Glyma.10G238800
3VS7	Down	GO:0009089	0.0462185	1	1	4	lysine biosynthetic process via diaminopimelate	biological_process	Glyma.10G238800
3VS7	Up	GO:0003700	0.000132965	0.249841	15	840	transcription factor activity, sequence-specific DNA binding	molecular_function	Glyma.03G002300, Glyma.03G162500, Glyma.05G105600, Glyma.06G125100, Glyma.08G261500, Glyma.10G067000, Glyma.13G096900, Glyma.13G227100, Glyma.14G083700, Glyma.17G132700, Glyma.17G158300, Glyma.18G052500, Glyma.18G277100, XLOC_002575, XLOC_028335
3VS7	Up	GO:0004650	0.000281369	0.264346	3	25	polygalacturonase activity	molecular_function	Glyma.02G009300, Glyma.09G224800, Glyma.10G010000
3VS7	Up	GO:0043565	0.00148221	0.928357	3	38	sequence-specific DNA binding	molecular_function	Glyma.05G105600, XLOC_002575, XLOC_028335
3VS7	Up	GO:0016491	0.00282617	1	11	699	oxidoreductase activity	molecular_function	Glyma.01G219400, Glyma.03G187900, Glyma.04G019500, Glyma.04G121700, Glyma.07G130800, Glyma.07G150900, Glyma.08G039300, Glyma.13G222100, Glyma.16G153400, Glyma.17G054600, Glyma.20G010900
3VS7	Up	GO:0050664	0.00502503	1	2	17	oxidoreductase activity, acting on NAD(P)H, oxygen as acceptor	molecular_function	Glyma.07G130800, Glyma.20G029600
3VS7	Up	GO:0006772	0.00606531	1	1	1	thiamine metabolic process	biological_process	XLOC_015695
3VS7	Up	GO:0044715	0.00606531	1	1	1	8-oxo-dGDP phosphatase activity	molecular_function	XLOC_015695
3VS7	Up	GO:0042335	0.00652799	1	1	1	cuticle development	biological_process	XLOC_028335
3VS7	Up	GO:0003712	0.00748051	1	2	22	transcription cofactor activity	molecular_function	Glyma.03G194700, Glyma.19G194300
3VS7	Up	GO:0048765	0.0130138	1	1	2	root hair cell differentiation	biological_process	XLOC_028335
3VS7	Up	GO:0004601	0.0150319	1	4	164	peroxidase activity	molecular_function	Glyma.03G007700, Glyma.07G130800, Glyma.18G055500, Glyma.20G029600
3VS7	Up	GO:0016020	0.0218387	1	9	690	membrane	cellular_component	Glyma.03G222300, Glyma.07G006500, Glyma.08G290600, Glyma.09G146800, Glyma.13G227100, Glyma.14G148100, Glyma.17G136500, Glyma.17G148600, Glyma.17G207800
3VS7	Up	GO:0043481	0.0222428	1	1	4	anthocyanin accumulation in tissues in response to UV light	biological_process	XLOC_028335
3VS7	Up	GO:0008356	0.02586	1	1	4	asymmetric cell division	biological_process	Glyma.05G105600
3VS7	Up	GO:0009956	0.02586	1	1	4	radial pattern formation	biological_process	Glyma.05G105600
3VS7	Up	GO:0004375	0.02586	1	1	4	glycine dehydrogenase (decarboxylating) activity	molecular_function	Glyma.06G052100
3VS7	Up	GO:0007275	0.0287674	1	2	44	multicellular organismal development	biological_process	Glyma.13G096900, Glyma.17G158300
3VS7	Up	GO:0004654	0.0314399	1	1	5	polyribonucleotide nucleotidyltransferase activity	molecular_function	Glyma.05G005200
3VS7	Up	GO:0006546	0.0322209	1	1	5	glycine catabolic process	biological_process	Glyma.06G052100
3VS7	Up	GO:0048364	0.0342662	1	1	6	root development	biological_process	XLOC_028335
3VS7	Up	GO:0004657	0.0385407	1	1	6	proline dehydrogenase activity	molecular_function	Glyma.19G042900
3VS7	Up	GO:0022857	0.043716	1	3	134	transmembrane transporter activity	molecular_function	Glyma.13G227100, Glyma.14G148100, Glyma.17G207800
3VS7	Up	GO:0006873	0.0441477	1	1	8	cellular ion homeostasis	biological_process	Glyma.04G027300
3VS7	Up	GO:0008308	0.0441477	1	1	8	voltage-gated anion channel activity	molecular_function	Glyma.04G027300
3VS7	Up	GO:0006402	0.0457141	1	1	8	mRNA catabolic process	biological_process	Glyma.05G005200
3VS7	Up	GO:0008083	0.0481653	1	1	11	growth factor activity	molecular_function	Glyma.12G181700
3VS8	Down	GO:0015979	1.58974e-10	2.98711e-07	12	87	photosynthesis	biological_process	Glyma.02G061100, Glyma.04G014500, Glyma.08G304200, Glyma.09G073900, Glyma.09G087700, Glyma.09G090100, Glyma.10G256000, Glyma.10G290700, Glyma.15G194300, Glyma.15G253700, Glyma.18G046700, Glyma.18G114900
3VS8	Down	GO:0009522	8.22823e-10	7.73042e-07	8	33	photosystem I	cellular_component	Glyma.08G204800, Glyma.09G087700, Glyma.09G090100, Glyma.10G256000, Glyma.13G129500, Glyma.13G357300, Glyma.15G003800, Glyma.15G194300
3VS8	Down	GO:0009765	5.33478e-09	3.34135e-06	8	34	photosynthesis, light harvesting	biological_process	Glyma.02G305400, Glyma.06G039700, Glyma.07G047600, Glyma.08G074000, Glyma.13G282000, Glyma.15G179400, Glyma.16G145800, Glyma.20G212900
3VS8	Down	GO:0009523	3.68762e-08	1.73226e-05	9	66	photosystem II	cellular_component	Glyma.02G061100, Glyma.04G014500, Glyma.08G304200, Glyma.09G073900, Glyma.10G290700, Glyma.15G253700, Glyma.18G046700, Glyma.18G114900, XLOC_034334
3VS8	Down	GO:0009654	3.76106e-07	0.000141341	7	40	photosystem II oxygen evolving complex	cellular_component	Glyma.02G061100, Glyma.04G014500, Glyma.08G304200, Glyma.10G290700, Glyma.15G253700, Glyma.18G046700, Glyma.18G114900
3VS8	Down	GO:0006633	0.000104312	0.0326669	6	64	fatty acid biosynthetic process	biological_process	Glyma.04G057800, Glyma.06G058500, Glyma.06G118500, Glyma.10G274400, Glyma.12G075100, Glyma.17G069100
3VS8	Down	GO:0009538	0.00038507	0.103364	3	13	photosystem I reaction center	cellular_component	Glyma.08G204800, Glyma.13G129500, Glyma.13G357300
3VS8	Down	GO:0005509	0.000754329	0.170331	6	92	calcium ion binding	molecular_function	Glyma.02G061100, Glyma.04G014500, Glyma.08G304200, Glyma.10G290700, Glyma.18G046700, Glyma.18G114900
3VS8	Down	GO:0008610	0.00081585	0.170331	4	35	lipid biosynthetic process	biological_process	Glyma.04G057800, Glyma.06G058500, Glyma.10G274400, Glyma.12G075100
3VS8	Down	GO:0010207	0.00143603	0.26983	2	5	photosystem II assembly	biological_process	Glyma.12G200200, Glyma.13G302100
3VS8	Down	GO:0016620	0.00172592	0.294818	3	20	oxidoreductase activity, acting on the aldehyde or oxo group of donors, NAD or NADP as acceptor	molecular_function	Glyma.04G015900, Glyma.16G044900, Glyma.19G106800
3VS8	Down	GO:0019684	0.00267368	0.418654	2	10	photosynthesis, light reaction	biological_process	Glyma.04G095000, XLOC_026945
3VS8	Down	GO:0009772	0.00327556	0.473445	2	11	photosynthetic electron transport in photosystem II	biological_process	Glyma.04G095000, XLOC_034334
3VS8	Down	GO:0048544	0.00556227	0.746536	3	30	recognition of pollen	biological_process	Glyma.04G139100, Glyma.08G061000, Glyma.12G198100
3VS8	Down	GO:0005506	0.00893046	1	10	347	iron ion binding	molecular_function	Glyma.02G119600, Glyma.03G030900, Glyma.13G120500, Glyma.14G117200, Glyma.17G069100, Glyma.18G272300, Glyma.19G015000, Glyma.20G007200, Glyma.20G018600, XLOC_034334
3VS8	Down	GO:0004568	0.00909818	1	2	12	chitinase activity	molecular_function	Glyma.01G160100, Glyma.16G119200
3VS8	Down	GO:0006032	0.00909818	1	2	12	chitin catabolic process	biological_process	Glyma.01G160100, Glyma.16G119200
3VS8	Down	GO:0004332	0.0110074	1	2	13	fructose-bisphosphate aldolase activity	molecular_function	Glyma.04G008300, Glyma.11G111400
3VS8	Down	GO:0030665	0.0117905	1	1	1	clathrin-coated vesicle membrane	cellular_component	XLOC_025546
3VS8	Down	GO:0045017	0.011921	1	1	1	glycerolipid biosynthetic process	biological_process	Glyma.12G114900
3VS8	Down	GO:0006101	0.0120899	1	1	1	citrate metabolic process	biological_process	XLOC_026551
3VS8	Down	GO:0048027	0.0120899	1	1	1	mRNA 5'-UTR binding	molecular_function	XLOC_026551
3VS8	Down	GO:0008152	0.0126987	1	14	583	metabolic process	biological_process	Glyma.01G021900, Glyma.02G002000, Glyma.06G183900, Glyma.06G247100, Glyma.09G135700, Glyma.09G240200, Glyma.12G009200, Glyma.12G122700, Glyma.12G138800, Glyma.13G183200, Glyma.18G003100, Glyma.19G036100, Glyma.19G079000, Glyma.20G107800
3VS8	Down	GO:0009635	0.0155456	1	1	2	response to herbicide	biological_process	XLOC_034334
3VS8	Down	GO:0010242	0.0155456	1	1	2	oxygen evolving activity	molecular_function	XLOC_034334
3VS8	Down	GO:0030131	0.0228896	1	1	2	clathrin adaptor complex	cellular_component	XLOC_025546
3VS8	Down	GO:0009535	0.0229943	1	2	29	chloroplast thylakoid membrane	cellular_component	XLOC_026945, XLOC_034334
3VS8	Down	GO:0003994	0.0247676	1	1	2	aconitate hydratase activity	molecular_function	XLOC_026551
3VS8	Down	GO:0071949	0.0255004	1	1	2	FAD binding	molecular_function	Glyma.17G174500
3VS8	Down	GO:0006090	0.0255004	1	1	2	pyruvate metabolic process	biological_process	Glyma.07G253700
3VS8	Down	GO:0050242	0.0255004	1	1	2	pyruvate, phosphate dikinase activity	molecular_function	Glyma.07G253700
3VS8	Down	GO:0016705	0.0260122	1	8	293	oxidoreductase activity, acting on paired donors, with incorporation or reduction of molecular oxygen	molecular_function	Glyma.02G119600, Glyma.03G030900, Glyma.13G120500, Glyma.14G117200, Glyma.18G272300, Glyma.19G015000, Glyma.20G007200, Glyma.20G018600
3VS8	Down	GO:0034599	0.0350751	1	1	3	cellular response to oxidative stress	biological_process	Glyma.12G178800
3VS8	Down	GO:0071486	0.0350751	1	1	3	cellular response to high light intensity	biological_process	Glyma.12G178800
3VS8	Down	GO:0016310	0.0380069	1	1	3	phosphorylation	biological_process	Glyma.07G253700
3VS8	Down	GO:0016020	0.0412406	1	14	690	membrane	cellular_component	Glyma.02G188300, Glyma.02G301200, Glyma.03G005300, Glyma.04G057800, Glyma.04G240000, Glyma.06G058500, Glyma.06G118500, Glyma.08G050500, Glyma.08G070800, Glyma.10G086800, Glyma.10G274400, Glyma.12G075100, Glyma.12G133700, Glyma.19G202200
3VS8	Down	GO:0009579	0.0424128	1	1	5	thylakoid	cellular_component	Glyma.09G090100
3VS8	Down	GO:0045156	0.0431566	1	1	6	electron transporter, transferring electrons within the cyclic electron transport pathway of photosynthesis activity	molecular_function	XLOC_034334
3VS8	Down	GO:0006508	0.0467131	1	6	211	proteolysis	biological_process	Glyma.02G215700, Glyma.03G199100, Glyma.07G205400, Glyma.14G085600, Glyma.19G045800, Glyma.19G196700
3VS8	Down	GO:0020037	0.0471764	1	10	455	heme binding	molecular_function	Glyma.02G119600, Glyma.03G030900, Glyma.08G179600, Glyma.13G120500, Glyma.14G117200, Glyma.18G211100, Glyma.18G272300, Glyma.19G015000, Glyma.20G007200, Glyma.20G018600
3VS8	Down	GO:0019898	0.049039	1	1	4	extrinsic component of membrane	cellular_component	Glyma.02G061100
3VS8	Up	GO:0006873	0.000807645	0.758782	2	8	cellular ion homeostasis	biological_process	Glyma.04G027300, Glyma.10G229300
3VS8	Up	GO:0008308	0.000807645	0.758782	2	8	voltage-gated anion channel activity	molecular_function	Glyma.04G027300, Glyma.10G229300
3VS8	Up	GO:0004601	0.00224306	1	5	164	peroxidase activity	molecular_function	Glyma.07G130800, Glyma.13G306900, Glyma.13G307000, Glyma.18G055500, Glyma.20G214200
3VS8	Up	GO:0006979	0.00277106	1	5	178	response to oxidative stress	biological_process	Glyma.01G219400, Glyma.13G306900, Glyma.13G307000, Glyma.18G055500, Glyma.20G214200
3VS8	Up	GO:0020037	0.00524097	1	8	455	heme binding	molecular_function	Glyma.04G035000, Glyma.05G220500, Glyma.09G160900, Glyma.13G306900, Glyma.13G307000, Glyma.16G210300, Glyma.18G055500, Glyma.20G214200
3VS8	Up	GO:0009299	0.00682661	1	1	1	mRNA transcription	biological_process	XLOC_005467
3VS8	Up	GO:0009886	0.00682661	1	1	1	post-embryonic morphogenesis	biological_process	XLOC_005467
3VS8	Up	GO:0010199	0.00682661	1	1	1	organ boundary specification between lateral organs and the meristem	biological_process	XLOC_005467
3VS8	Up	GO:0010492	0.00682661	1	1	1	maintenance of shoot apical meristem identity	biological_process	XLOC_005467
3VS8	Up	GO:0048441	0.00682661	1	1	1	petal development	biological_process	XLOC_005467
3VS8	Up	GO:0048834	0.00682661	1	1	1	specification of petal number	biological_process	XLOC_005467
3VS8	Up	GO:0004650	0.00721047	1	2	25	polygalacturonase activity	molecular_function	Glyma.02G009300, Glyma.09G224800
3VS8	Up	GO:0016491	0.00904312	1	10	699	oxidoreductase activity	molecular_function	Glyma.01G219400, Glyma.03G187900, Glyma.04G121700, Glyma.07G130800, Glyma.07G150900, Glyma.08G039300, Glyma.13G222100, Glyma.15G132600, Glyma.17G037300, Glyma.20G010900
3VS8	Up	GO:0003700	0.0113741	1	11	840	transcription factor activity, sequence-specific DNA binding	molecular_function	Glyma.03G002300, Glyma.05G105600, Glyma.06G125100, Glyma.08G011300, Glyma.09G129100, Glyma.13G096900, Glyma.13G102800, Glyma.14G096800, Glyma.15G135600, Glyma.17G132700, Glyma.18G277100
3VS8	Up	GO:0016020	0.0273988	1	9	690	membrane	cellular_component	Glyma.03G168100, Glyma.03G222300, Glyma.08G290600, Glyma.09G146800, Glyma.11G042000, Glyma.13G081100, Glyma.14G148100, Glyma.17G136500, Glyma.17G148600
3VS8	Up	GO:0008356	0.0286475	1	1	4	asymmetric cell division	biological_process	Glyma.05G105600
3VS8	Up	GO:0009956	0.0286475	1	1	4	radial pattern formation	biological_process	Glyma.05G105600
3VS8	Up	GO:0006810	0.030685	1	6	380	transport	biological_process	Glyma.08G136700, Glyma.08G290600, Glyma.11G042000, Glyma.11G224100, Glyma.13G118900, Glyma.17G148600
3VS8	Up	GO:0004654	0.0317321	1	1	5	polyribonucleotide nucleotidyltransferase activity	molecular_function	Glyma.05G005200
3VS8	Up	GO:0009058	0.0330126	1	3	114	biosynthetic process	biological_process	Glyma.08G030100, Glyma.09G255000, Glyma.16G032200
3VS8	Up	GO:0008083	0.0410201	1	1	11	growth factor activity	molecular_function	Glyma.12G181700
3VS8	Up	GO:0004657	0.0431057	1	1	6	proline dehydrogenase activity	molecular_function	Glyma.19G042900
3VS8	Up	GO:0006402	0.0447663	1	1	8	mRNA catabolic process	biological_process	Glyma.05G005200
3VS9	Down	GO:0015979	8.16081e-10	1.53342e-06	11	87	photosynthesis	biological_process	Glyma.08G154300, Glyma.08G304200, Glyma.09G073900, Glyma.09G087700, Glyma.09G090100, Glyma.10G256000, Glyma.10G290700, Glyma.15G174200, Glyma.18G046700, Glyma.18G114900, XLOC_009133
3VS9	Down	GO:0009522	1.14317e-08	1.07401e-05	7	33	photosystem I	cellular_component	Glyma.08G204800, Glyma.09G087700, Glyma.09G090100, Glyma.10G256000, Glyma.13G357300, Glyma.15G126100, XLOC_009133
3VS9	Down	GO:0009535	3.98451e-08	2.49563e-05	6	29	chloroplast thylakoid membrane	cellular_component	XLOC_003506, XLOC_009133, XLOC_026945, XLOC_034214, XLOC_034334, XLOC_042521
3VS9	Down	GO:0009523	2.49251e-07	0.000117086	8	66	photosystem II	cellular_component	Glyma.08G154300, Glyma.08G304200, Glyma.09G073900, Glyma.10G290700, Glyma.15G174200, Glyma.18G046700, Glyma.18G114900, XLOC_034334
3VS9	Down	GO:0019684	3.79787e-07	0.000142724	4	10	photosynthesis, light reaction	biological_process	Glyma.04G095000, Glyma.06G217900, XLOC_026945, XLOC_042521
3VS9	Down	GO:0009765	3.36048e-05	0.0105239	5	34	photosynthesis, light harvesting	biological_process	Glyma.02G305400, Glyma.07G047600, Glyma.13G282000, Glyma.15G179400, Glyma.20G212900
3VS9	Down	GO:0009772	4.60921e-05	0.0123724	3	11	photosynthetic electron transport in photosystem II	biological_process	Glyma.04G095000, Glyma.06G217900, XLOC_034334
3VS9	Down	GO:0009654	6.61945e-05	0.0155474	5	40	photosystem II oxygen evolving complex	cellular_component	Glyma.08G154300, Glyma.08G304200, Glyma.10G290700, Glyma.18G046700, Glyma.18G114900
3VS9	Down	GO:0008289	0.000742189	0.154953	4	38	lipid binding	molecular_function	Glyma.03G016600, Glyma.10G238100, Glyma.12G194400, Glyma.13G308200
3VS9	Down	GO:0010207	0.00121622	0.228529	2	5	photosystem II assembly	biological_process	Glyma.12G200200, Glyma.13G302100
3VS9	Down	GO:0005509	0.00314534	0.537213	5	92	calcium ion binding	molecular_function	Glyma.08G154300, Glyma.08G304200, Glyma.10G290700, Glyma.18G046700, Glyma.18G114900
3VS9	Down	GO:0016168	0.00350964	0.537213	2	13	chlorophyll binding	molecular_function	XLOC_009133, XLOC_034334
3VS9	Down	GO:0016655	0.00371675	0.537213	2	10	oxidoreductase activity, acting on NAD(P)H, quinone or similar compound as acceptor	molecular_function	XLOC_026945, XLOC_042521
3VS9	Down	GO:0005739	0.00438965	0.550481	5	104	mitochondrion	cellular_component	Glyma.09G089600, Glyma.15G000800, XLOC_003506, XLOC_019777, XLOC_026551
3VS9	Down	GO:0048544	0.00439447	0.550481	3	30	recognition of pollen	biological_process	Glyma.04G139100, Glyma.08G061000, Glyma.12G198100
3VS9	Down	GO:0008152	0.00636461	0.729443	14	583	metabolic process	biological_process	Glyma.01G021900, Glyma.02G002000, Glyma.03G221100, Glyma.04G115300, Glyma.04G243000, Glyma.06G247100, Glyma.09G135700, Glyma.09G240200, Glyma.12G122700, Glyma.12G138800, Glyma.13G183200, Glyma.18G265700, Glyma.19G036100, Glyma.19G079000
3VS9	Down	GO:0005886	0.00711875	0.729443	4	77	plasma membrane	cellular_component	XLOC_026551, XLOC_026945, XLOC_034214, XLOC_042521
3VS9	Down	GO:0009507	0.00718871	0.729443	4	90	chloroplast	cellular_component	Glyma.12G178800, XLOC_003506, XLOC_009133, XLOC_014230
3VS9	Down	GO:0042132	0.00774351	0.729443	2	12	fructose 1,6-bisphosphate 1-phosphatase activity	molecular_function	Glyma.10G225400, Glyma.18G193600
3VS9	Down	GO:0009538	0.00776416	0.729443	2	13	photosystem I reaction center	cellular_component	Glyma.08G204800, Glyma.13G357300
3VS9	Down	GO:0018298	0.0109004	0.834843	2	18	protein-chromophore linkage	biological_process	XLOC_009133, XLOC_034334
3VS9	Down	GO:0045017	0.0109274	0.834843	1	1	glycerolipid biosynthetic process	biological_process	Glyma.12G114900
3VS9	Down	GO:0045263	0.0110425	0.834843	1	2	proton-transporting ATP synthase complex, coupling factor F(o)	cellular_component	XLOC_034214
3VS9	Down	GO:0006101	0.0111075	0.834843	1	1	citrate metabolic process	biological_process	XLOC_026551
3VS9	Down	GO:0048027	0.0111075	0.834843	1	1	mRNA 5'-UTR binding	molecular_function	XLOC_026551
3VS9	Down	GO:0009635	0.0130269	0.906573	1	2	response to herbicide	biological_process	XLOC_034334
3VS9	Down	GO:0010242	0.0130269	0.906573	1	2	oxygen evolving activity	molecular_function	XLOC_034334
3VS9	Down	GO:0051539	0.0152237	1	2	19	4 iron, 4 sulfur cluster binding	molecular_function	XLOC_009133, XLOC_026551
3VS9	Down	GO:0048038	0.0211503	1	2	26	quinone binding	molecular_function	XLOC_026945, XLOC_042521
3VS9	Down	GO:0003994	0.0228753	1	1	2	aconitate hydratase activity	molecular_function	XLOC_026551
3VS9	Down	GO:0071949	0.0236575	1	1	2	FAD binding	molecular_function	Glyma.17G174500
3VS9	Down	GO:0006090	0.0236575	1	1	2	pyruvate metabolic process	biological_process	Glyma.07G253700
3VS9	Down	GO:0050242	0.0236575	1	1	2	pyruvate, phosphate dikinase activity	molecular_function	Glyma.07G253700
3VS9	Down	GO:0016021	0.030807	1	14	743	integral component of membrane	cellular_component	Glyma.02G164400, Glyma.06G317100, Glyma.08G194700, Glyma.11G175800, Glyma.16G036000, Glyma.16G114900, Glyma.16G180900, Glyma.18G066000, Glyma.20G002000, XLOC_009133, XLOC_026945, XLOC_034214, XLOC_034334, XLOC_042521
3VS9	Down	GO:0006633	0.0316239	1	3	64	fatty acid biosynthetic process	biological_process	Glyma.06G058500, Glyma.12G075100, Glyma.17G069100
3VS9	Down	GO:0034599	0.0321436	1	1	3	cellular response to oxidative stress	biological_process	Glyma.12G178800
3VS9	Down	GO:0071486	0.0321436	1	1	3	cellular response to high light intensity	biological_process	Glyma.12G178800
3VS9	Down	GO:0016310	0.0352767	1	1	3	phosphorylation	biological_process	Glyma.07G253700
3VS9	Down	GO:0045156	0.03561	1	1	6	electron transporter, transferring electrons within the cyclic electron transport pathway of photosynthesis activity	molecular_function	XLOC_034334
3VS9	Down	GO:0009579	0.0365385	1	1	5	thylakoid	cellular_component	Glyma.09G090100
3VS9	Down	GO:0009058	0.0387534	1	4	114	biosynthetic process	biological_process	Glyma.07G258500, Glyma.08G269600, Glyma.09G070500, Glyma.17G015600
3VS9	Down	GO:0010309	0.0440057	1	1	4	acireductone dioxygenase [iron(II)-requiring] activity	molecular_function	Glyma.20G150100
3VS9	Down	GO:0016491	0.0475965	1	13	699	oxidoreductase activity	molecular_function	Glyma.02G047600, Glyma.05G187700, Glyma.11G003200, Glyma.11G173700, Glyma.12G021500, Glyma.13G183200, Glyma.14G223600, Glyma.15G124700, Glyma.15G240600, Glyma.17G069100, Glyma.18G138300, XLOC_009133, XLOC_042521
3VS9	Up	GO:0006979	0.000285083	0.535672	6	178	response to oxidative stress	biological_process	Glyma.01G219400, Glyma.03G007700, Glyma.12G195500, Glyma.12G195600, Glyma.13G307000, Glyma.20G214200
3VS9	Up	GO:0004601	0.00152083	1	5	164	peroxidase activity	molecular_function	Glyma.03G007700, Glyma.12G195500, Glyma.12G195600, Glyma.13G307000, Glyma.20G214200
3VS9	Up	GO:0007275	0.00163932	1	3	44	multicellular organismal development	biological_process	Glyma.05G108600, Glyma.13G096900, Glyma.17G158300
3VS9	Up	GO:0006952	0.00495991	1	3	71	defense response	biological_process	Glyma.01G165200, Glyma.06G249800, Glyma.15G217100
3VS9	Up	GO:0004650	0.00581456	1	2	25	polygalacturonase activity	molecular_function	Glyma.02G009300, Glyma.09G224800
3VS9	Up	GO:0003700	0.0130213	1	10	840	transcription factor activity, sequence-specific DNA binding	molecular_function	Glyma.03G145800, Glyma.05G108600, Glyma.13G096900, Glyma.13G102800, Glyma.13G122700, Glyma.14G096800, Glyma.14G147500, Glyma.17G158300, Glyma.18G277100, Glyma.20G203500
3VS9	Up	GO:0042545	0.0249479	1	2	50	cell wall modification	biological_process	Glyma.01G138000, Glyma.19G212500
3VS9	Up	GO:0004618	0.0276566	1	1	5	phosphoglycerate kinase activity	molecular_function	Glyma.15G262100
3VS9	Up	GO:0004654	0.0277611	1	1	5	polyribonucleotide nucleotidyltransferase activity	molecular_function	Glyma.05G005200
3VS9	Up	GO:0016020	0.0287868	1	8	690	membrane	cellular_component	Glyma.04G211800, Glyma.08G017000, Glyma.08G290600, Glyma.09G146800, Glyma.13G355000, Glyma.17G148600, Glyma.19G001600, Glyma.20G152500
3VS9	Up	GO:0020037	0.0303444	1	6	455	heme binding	molecular_function	Glyma.03G007700, Glyma.05G220500, Glyma.12G195500, Glyma.12G195600, Glyma.13G307000, Glyma.20G214200
3VS9	Up	GO:0004657	0.0340173	1	1	6	proline dehydrogenase activity	molecular_function	Glyma.19G042900
3VS9	Up	GO:0030599	0.0377308	1	2	63	pectinesterase activity	molecular_function	Glyma.01G138000, Glyma.19G212500
3VS9	Up	GO:0006873	0.0391868	1	1	8	cellular ion homeostasis	biological_process	Glyma.04G027300
3VS9	Up	GO:0008308	0.0391868	1	1	8	voltage-gated anion channel activity	molecular_function	Glyma.04G027300
3VS9	Up	GO:0006402	0.0405267	1	1	8	mRNA catabolic process	biological_process	Glyma.05G005200
3VS9	Up	GO:0004066	0.0450938	1	1	8	asparagine synthase (glutamine-hydrolyzing) activity	molecular_function	Glyma.14G195000
3VS9	Up	GO:0004185	0.0486671	1	2	69	serine-type carboxypeptidase activity	molecular_function	Glyma.03G125600, Glyma.08G257800
3VS10	Down	GO:0015979	2.47588e-10	4.65218e-07	12	87	photosynthesis	biological_process	Glyma.04G014500, Glyma.08G154300, Glyma.09G073900, Glyma.09G087700, Glyma.09G090100, Glyma.10G256000, Glyma.10G290700, Glyma.15G080200, Glyma.15G174200, Glyma.15G273300, Glyma.18G046700, XLOC_009133
3VS10	Down	GO:0009523	8.52326e-07	0.00080076	8	66	photosystem II	cellular_component	Glyma.04G014500, Glyma.08G154300, Glyma.09G073900, Glyma.10G290700, Glyma.15G174200, Glyma.15G273300, Glyma.18G046700, XLOC_034334
3VS10	Down	GO:0009522	1.8957e-06	0.00118734	6	33	photosystem I	cellular_component	Glyma.07G019700, Glyma.09G087700, Glyma.09G090100, Glyma.10G256000, Glyma.13G129500, XLOC_009133
3VS10	Down	GO:0009535	1.83958e-05	0.00864142	5	29	chloroplast thylakoid membrane	cellular_component	XLOC_003506, XLOC_009133, XLOC_016679, XLOC_026945, XLOC_034334
3VS10	Down	GO:0009654	8.87451e-05	0.0333504	5	40	photosystem II oxygen evolving complex	cellular_component	Glyma.04G014500, Glyma.08G154300, Glyma.10G290700, Glyma.15G273300, Glyma.18G046700
3VS10	Down	GO:0016168	0.000405906	0.127116	3	13	chlorophyll binding	molecular_function	Glyma.05G074900, XLOC_009133, XLOC_034334
3VS10	Down	GO:0008610	0.000478669	0.128489	4	35	lipid biosynthetic process	biological_process	Glyma.04G057800, Glyma.06G058500, Glyma.10G274400, Glyma.12G075100
3VS10	Down	GO:0006633	0.000598363	0.14054	5	64	fatty acid biosynthetic process	biological_process	Glyma.04G057800, Glyma.06G058500, Glyma.06G118500, Glyma.10G274400, Glyma.12G075100
3VS10	Down	GO:0010207	0.00130254	0.270919	2	5	photosystem II assembly	biological_process	Glyma.12G200200, Glyma.13G302100
3VS10	Down	GO:0006508	0.00144183	0.270919	8	211	proteolysis	biological_process	Glyma.02G215700, Glyma.03G199100, Glyma.05G109400, Glyma.05G132000, Glyma.07G205400, Glyma.14G085600, Glyma.19G045800, Glyma.19G196700
3VS10	Down	GO:0005509	0.00328062	0.560009	5	92	calcium ion binding	molecular_function	Glyma.04G014500, Glyma.08G154300, Glyma.10G290700, Glyma.15G273300, Glyma.18G046700
3VS10	Down	GO:0009507	0.00357643	0.560009	5	90	chloroplast	cellular_component	XLOC_003506, XLOC_009133, XLOC_014132, XLOC_014230, XLOC_016679
3VS10	Down	GO:0016020	0.00442573	0.639688	15	690	membrane	cellular_component	Glyma.01G058600, Glyma.02G188300, Glyma.04G057800, Glyma.04G240000, Glyma.05G074900, Glyma.06G058500, Glyma.06G118500, Glyma.08G070800, Glyma.09G160000, Glyma.10G274400, Glyma.12G075100, Glyma.16G209400, Glyma.17G108200, Glyma.19G005900, Glyma.19G202200
3VS10	Down	GO:0045261	0.00524395	0.703813	2	11	proton-transporting ATP synthase complex, catalytic core F(1)	cellular_component	Glyma.13G204800, XLOC_016679
3VS10	Down	GO:0019684	0.005694	0.713269	2	10	photosynthesis, light reaction	biological_process	Glyma.04G095000, XLOC_026945
3VS10	Down	GO:0009772	0.0069064	0.763434	2	11	photosynthetic electron transport in photosystem II	biological_process	Glyma.04G095000, XLOC_034334
3VS10	Down	GO:0009765	0.00690707	0.763434	3	34	photosynthesis, light harvesting	biological_process	Glyma.07G047600, Glyma.15G179400, Glyma.20G212900
3VS10	Down	GO:0046933	0.00904899	0.938351	2	14	proton-transporting ATP synthase activity, rotational mechanism	molecular_function	Glyma.13G204800, XLOC_016679
3VS10	Down	GO:0009538	0.00948838	0.938351	2	13	photosystem I reaction center	cellular_component	Glyma.07G019700, Glyma.13G129500
3VS10	Down	GO:0006101	0.011632	1	1	1	citrate metabolic process	biological_process	XLOC_026551
3VS10	Down	GO:0048027	0.011632	1	1	1	mRNA 5'-UTR binding	molecular_function	XLOC_026551
3VS10	Down	GO:0018298	0.0138707	1	2	18	protein-chromophore linkage	biological_process	XLOC_009133, XLOC_034334
3VS10	Down	GO:0071949	0.0177253	1	1	2	FAD binding	molecular_function	Glyma.17G174500
3VS10	Down	GO:0051539	0.0183046	1	2	19	4 iron, 4 sulfur cluster binding	molecular_function	XLOC_009133, XLOC_026551
3VS10	Down	GO:0003994	0.0200366	1	1	2	aconitate hydratase activity	molecular_function	XLOC_026551
3VS10	Down	GO:0015986	0.0212929	1	2	21	ATP synthesis coupled proton transport	biological_process	Glyma.13G204800, XLOC_016679
3VS10	Down	GO:0009635	0.0231333	1	1	2	response to herbicide	biological_process	XLOC_034334
3VS10	Down	GO:0010242	0.0231333	1	1	2	oxygen evolving activity	molecular_function	XLOC_034334
3VS10	Down	GO:0008152	0.0236006	1	12	583	metabolic process	biological_process	Glyma.01G021900, Glyma.03G014300, Glyma.03G221100, Glyma.06G247100, Glyma.09G135700, Glyma.09G240200, Glyma.12G009200, Glyma.12G122700, Glyma.13G183200, Glyma.18G265700, Glyma.19G079000, Glyma.19G218100
3VS10	Down	GO:0048038	0.0288668	1	2	26	quinone binding	molecular_function	Glyma.18G262700, XLOC_026945
3VS10	Down	GO:0048544	0.0292675	1	2	30	recognition of pollen	biological_process	Glyma.04G139100, Glyma.08G061000
3VS10	Down	GO:0004222	0.0297781	1	3	71	metalloendopeptidase activity	molecular_function	Glyma.02G215700, Glyma.05G132000, XLOC_003506
3VS10	Down	GO:0009058	0.0340418	1	4	114	biosynthetic process	biological_process	Glyma.07G258500, Glyma.08G269600, Glyma.09G070500, Glyma.17G015600
3VS10	Down	GO:0008289	0.0435437	1	2	38	lipid binding	molecular_function	Glyma.12G194400, Glyma.13G308200
3VS10	Down	GO:0010309	0.0455348	1	1	4	acireductone dioxygenase [iron(II)-requiring] activity	molecular_function	Glyma.20G150100
3VS10	Down	GO:0051920	0.0455751	1	1	4	peroxiredoxin activity	molecular_function	Glyma.03G200600
3VS10	Down	GO:0032259	0.0456085	1	1	4	methylation	biological_process	Glyma.07G124200
3VS10	Down	GO:0008839	0.0456323	1	1	4	4-hydroxy-tetrahydrodipicolinate reductase	molecular_function	Glyma.10G238800
3VS10	Down	GO:0009089	0.0456323	1	1	4	lysine biosynthetic process via diaminopimelate	biological_process	Glyma.10G238800
3VS10	Down	GO:0009521	0.0457346	1	1	4	photosystem	cellular_component	Glyma.05G074900
3VS10	Down	GO:0009767	0.0457346	1	1	4	photosynthetic electron transport chain	biological_process	Glyma.05G074900
3VS10	Up	GO:0006873	0.000525046	0.493281	2	8	cellular ion homeostasis	biological_process	Glyma.04G027300, Glyma.10G229300
3VS10	Up	GO:0008308	0.000525046	0.493281	2	8	voltage-gated anion channel activity	molecular_function	Glyma.04G027300, Glyma.10G229300
3VS10	Up	GO:0006979	0.00119572	0.748919	5	178	response to oxidative stress	biological_process	Glyma.01G219400, Glyma.12G195500, Glyma.13G307000, Glyma.18G055500, Glyma.20G214200
3VS10	Up	GO:0020037	0.00461472	0.861421	7	455	heme binding	molecular_function	Glyma.03G160300, Glyma.04G035000, Glyma.05G220500, Glyma.12G195500, Glyma.13G307000, Glyma.18G055500, Glyma.20G214200
3VS10	Up	GO:0016491	0.00476863	0.861421	9	699	oxidoreductase activity	molecular_function	Glyma.01G219400, Glyma.04G121700, Glyma.08G039300, Glyma.09G046400, Glyma.13G147600, Glyma.13G222100, Glyma.16G153400, Glyma.17G037300, Glyma.20G010900
3VS10	Up	GO:0009299	0.00504291	0.861421	1	1	mRNA transcription	biological_process	XLOC_005467
3VS10	Up	GO:0009886	0.00504291	0.861421	1	1	post-embryonic morphogenesis	biological_process	XLOC_005467
3VS10	Up	GO:0010199	0.00504291	0.861421	1	1	organ boundary specification between lateral organs and the meristem	biological_process	XLOC_005467
3VS10	Up	GO:0010492	0.00504291	0.861421	1	1	maintenance of shoot apical meristem identity	biological_process	XLOC_005467
3VS10	Up	GO:0048441	0.00504291	0.861421	1	1	petal development	biological_process	XLOC_005467
3VS10	Up	GO:0048834	0.00504291	0.861421	1	1	specification of petal number	biological_process	XLOC_005467
3VS10	Up	GO:0004601	0.00640384	1	4	164	peroxidase activity	molecular_function	Glyma.12G195500, Glyma.13G307000, Glyma.18G055500, Glyma.20G214200
3VS10	Up	GO:0012511	0.0137879	1	1	3	monolayer-surrounded lipid storage body	cellular_component	Glyma.17G122000
3VS10	Up	GO:0009058	0.0160789	1	3	114	biosynthetic process	biological_process	Glyma.08G030100, Glyma.09G255000, Glyma.16G032200
3VS10	Up	GO:0007275	0.0179928	1	2	44	multicellular organismal development	biological_process	Glyma.13G096900, Glyma.17G158300
[truncated: 1,490 more rows]
